# Supplementary material for: Maize Zmcyp710a8 Mutant as a Tool to Decipher the Function of Stigmasterol in Plant Metabolism
Source: Front Plant Sci. 2021 Nov 3;12:732216. doi: 10.3389/fpls.2021.732216 (PMC8597121; doi:10.3389/fpls.2021.732216)
Supplement: Supplementary file 1 [file Table_1.XLSX]

## Sheet: Col-0 | ZmCYP710A8
Supplementary Data 1. Segregation analysis of bar gene in T3 families from single T2 plants transformed with ZmCYP710A8 in Col-0 background
Molecular construct	Line-plant number	Number of seeds grown in glufosinate (10 mg/L)				c2 b	p value
		Total	Resistant (R)	Susceptible (S)	R or S? a
35S::ZmCYP710A8	Parental Line L4 c	46	33	13	-	0.26087	0.609523
	L4-P1	48	48	0	-	16	6.33425e-05
	L4-P4	48	47	0	1	15.36	0.000245733
	L4-P2*	45	45	0	-	15	0.000107511
	L4-P17	47	27	20	-	7.7234	0.00545095
	L4-P12	49	45	4	-	7.40816	0.00649286
	L4-P14	46	27	19	-	6.52174	0.0106564
	L4-P18	47	30	17	-	3.12766	0.0769742
	L4-P16	45	31	14	-	0.896296	0.343777
	L4-P8	45	36	9	-	0.6	0.438578
	L4-P19	45	32	13	-	0.362963	0.546865
	L4-P15	47	37	10	-	0.347518	0.555522
	L4-P7	47	37	10	-	0.347518	0.555522
	L4-P14	48	37	11	-	0.111111	0.738883
	L4-P11	46	35	11	-	0.0289855	0.864813
35S::ZmCYP710A8	Parental Line L8 c	48	32	16	-	1.77778	0.182422
	L8-P1*	48	48	0	-	16	6.33425e-05
	L8-P8	48	48	0	-	16	6.33425e-05
	L8-P2	48	46	0	2	14.7778	0.000120952
	L8-P7	48	45	3	-	14.25	0.000160061
	L8-P5	48	42	6	-	4	0.0455003
	L8-P4	49	41	8	-	1.96599	0.160875
	L8-P3	47	35	12	-	0.0070922	0.932885
	L8-P6	49	37	12	-	0.00680272	0.934266
35S::ZmCYP710A8	Parental Line L11 c	50	38	12	-	0.0266667	0.870283
	L11-P6	49	21	28	-	27	2.03455e-07
	L11-P12	47	21	26	-	23.0426	1.58455e-06
	L11-P16	46	21	25	-	21.1304	4.29059e-06
	L11-P16	47	23	24	-	17.0284	3.68255e-05
	L11-P11*	50	48	0	2	15.44	8.51664e-05
	L11-P1	47	27	20	-	7.7234	0.00545095
	L11-P18	47	27	20	-	7.7234	0.00545095
	L11-P18	45	41	4	-	6.22963	0.012563
	L11-P10	47	30	17	-	3.12766	0.0769742
	L11-P15	48	41	7	-	2.77778	0.0955807
	L11-P10	49	32	17	-	2.45578	0.117093
	L11-P4	44	29	15	-	1.93939	0.163734
	L11-P12	49	35	14	-	0.333333	0.563703
	L11-P5	49	36	13	-	0.0612245	0.804571
	L11-P9	46	34	12	-	0.0289855	0.864813
	L11-P13	50	37	13	-	0.0266667	0.870283
35S::ZmCYP710A8	Parental Line L15 c	51	36	15	-	0.529412	0.466854
	L15-P7*	48	48	0	-	16	6.33425e-05
	L15-P17	47	47	0	-	15.6667	7.55439e-05
	L15-P16	49	46	0	3	14.5782	0.000134459
	L15-P11	49	40	9	-	1.14966	0.28362
	L15-P12	49	39	10	-	0.55102	0.457901
	L15-P4	50	39	11	-	0.24	0.624206
	L15-P13	49	38	11	-	0.170068	0.680051
	L15-P8	50	37	13	-	0.0266667	0.870283
35S::ZmCYP710A8	Parental Line L22 c	48	37	11	-	0.111111	0.738883
	L22-P7*	50	50	0	-	16.6667	4.45571e-05
	L22-P2	48	47	0	1	15.3611	8.87972e-05
	L22-P3	43	42	0	1	13.6977	0.00021472
	L22-P16	46	46	0	-	3.92029	9.01124e-05
	L22-P4	46	39	7	-	2.34783	0.125458
	L22-P5	49	39	10	-	0.55102	0.457901
	L22-P1	50	39	11	-	0.24	0.624206
	L22-P8	50	39	11	-	0.24	0.624206
	L22-P6	49	38	11	-	0.170068	0.680051
Empty vector	Parental Line L10 c	49	38	11	-	0.170068	0.680051
	L10-P8*	47	47	0	-	16	6.33425e-05
	L10-P7	46	34	12	-	15.6667	7.55439e-05
	L10-P5	47	38	9	-	14.6667	0.000128295
	L10-P4	48	48	0	-	0.858156	0.354255
	L10-P3	45	35	10	-	0.185185	0.666955
	L10-P1	44	44	0	-	0.0289855	0.864813
	L10-P2	46	35	11	-	0.0289855	0.864813
a Seedlings that were indistinguishable between resistant and susceptible
b Ratio tested was 3:1
c Segregation analysis of Parental T2 families, the progenitor of the analyzed T3 families
* Homozygous plants that were used in sterol and RT-qPCR analysis

## Sheet: Atcyp710a1 | ZmCYP710A8
Table S3. Segregation analysis of bar gene in T3 families from single T2 plants transformed with ZmCYP710A8 in Atcyp710a1 background
Molecular construct	Line-plant number	Number of seeds grown in glufosinate (10 mg/L)				c2 b	p value
		Total	Resistant (R)	Susceptible (S)	R or S? a
35S::ZmCYP710A8	Parental Line L12 c	48	37	11	-	0.111111	0.738883
	L12-P3	47	47	0	-	16.1143	5.96325e-05
	L12-P2	48	48	0	-	16	6.33425e-05
	L12-P6*	48	48	0	-	16	6.33425e-05
	L12-P7	44	44	0	-	14.6667	0.000128295
	L12-P1	44	43	0	1	14.0303	0.000179888
	L12-P8	19	19	0	-	6.78571	0.00918903
	L12-P4	48	40	8	-	1.77778	0.182422
	L12-P5	39	26	13	-	1.21034	0.271264
35S::ZmCYP710A8	Parental Line L13 c	50	39	11	-	0.4158	0.51904
	L13-P8*	49	49	0	-	15.8919	6.70654e-05
	L13-P5	46	28	18	-	5.85455	0.0155369
	L13-P4	35	31	4	-	3.73932	0.0531462
	L13-P6	50	34	16	-	1.75439	0.185326
	L13-P2	50	40	10	-	0.438596	0.507801
	L13-P1	48	37	11	-	0.111111	0.738883
	L13-P3	48	36	12	-	0	1
	L13-P7	48	36	12	-	0	1
a Seedlings that were indistinguishable between resistant and susceptible
b Ratio tested was 3:1
c Segregation analysis of Parental T2 families, the progenitor of the analyzed T3 families
* Homozygous plants were bulked and the T4 offsprings were used in sterol, total metabolite, RT-qPCR analysis and flowering time emergence analysis
