# Supplementary material for: Maize Zmcyp710a8 Mutant as a Tool to Decipher the Function of Stigmasterol in Plant Metabolism
Source: Front Plant Sci. 2021 Nov 3;12:732216. doi: 10.3389/fpls.2021.732216 (PMC8597121; doi:10.3389/fpls.2021.732216)
Supplement: Supplementary file 2 [file Table_2.XLSX]

## Sheet: Maize-Root
Table S5. Mean fold change of metabolites in maize
		Mean fold change of metabolites in maize root (Relative to W22)			ANOVA analysis
Common Name	Library Name	Zmcyp710a8-1	Zmcyp710a8-2	W22	F statistic	p value	FDR
Sitosterol	Beta-Sitosterol, TMS derivative	2.51	2.34	1.00017	4396.1	3.4968e-14	1.1365e-11
RI2922.9, 17.6207 min, WR-2_P	RI2922.9, 17.6207 min, WR-2_P	0.852333	6.91	0.999167	2851.9	2.4449e-13	3.973e-11
RI1753.1, 9.5892 min, WR-2_P	RI1753.1, 9.5892 min, WR-2_P	0.946667	10.2	1.00033	1276.8	9.0163e-12	9.7676e-10
Stigmasterol	Stigmasterol, TMS derivative	0.00427333	0.301667	1.00133	901.22	4.2952e-11	3.4898e-09
Vanillic Acid	Vanillic Acid, 2TMS derivative	0.706333	7.78	1	684.01	1.4753e-10	9.5892e-09
L-Isoleucine	L-Isoleucine, N-trimethylsilyl-, trimethylsilyl ester	2.31667	2.71333	0.999833	325.5	4.0379e-09	2.1872e-07
RI1286.4, 5.0604 min, WR-2_NP	RI1286.4, 5.0604 min, WR-2_NP	76.3667	1.68333	0.999167	242.27	1.4934e-08	6.9334e-07
RI1178.2, 3.9220 min, WR-2_P	RI1178.2, 3.9220 min, WR-2_P	3.4	2.59	1.00083	146.28	1.3704e-07	5.5672e-06
Myo-inositol	Myo-inositol	1.42333	1.50333	0.999833	131.33	2.1925e-07	7.9175e-06
Sitosteryl glucoside	Sitosteryl glucoside	5.78	2.46333	0.999667	128.16	2.4387e-07	7.9257e-06
.beta.-D-Glucopyranose	.beta.-D-Glucopyranose, 5TMS derivative	1.158	2.34333	0.999	114.18	4.0248e-07	1.1239e-05
RI2076.5, 12.2049 min, WR-2_P	RI2076.5, 12.2049 min, WR-2_P	0.747333	1.97667	1.00017	113.38	4.1499e-07	1.1239e-05
RI1466.0, 6.9040 min, ZSR-2_P	RI1466.0, 6.9040 min, ZSR-2_P	1.77333	4.46	0.998833	98.11	7.7464e-07	1.9366e-05
L-Threonine	L-Threonine, 3TMS derivative	1.50667	1.33	0.999833	90.802	1.0802e-06	2.3404e-05
Serine	Serine	1.38	1.35	0.999667	91.468	1.0468e-06	2.3404e-05
L-Valine	L-Valine, 2TMS derivative	1.48333	1.60667	1.001	87.349	1.2754e-06	2.5906e-05
Phosphate	Silanol, trimethyl-, phosphate 31	1.34	1.06667	0.999	78.952	1.9633e-06	3.7535e-05
RI2062.7, 12.1022 min, WR-2_NP	RI2062.7, 12.1022 min, WR-2_NP	0.475	0.865	0.9995	70.225	3.2275e-06	5.8275e-05
Campesterol	Campesterol, TMS derivative	1.24333	1.06	1.00017	63.208	5.0301e-06	8.6041e-05
RI1696.3, 9.0812 min, WR-2_P	RI1696.3, 9.0812 min, WR-2_P	0.878667	1.15333	1	54.884	9.0772e-06	0.0001475
RI2248.0, 13.4529 min, WR-2_NP	RI2248.0, 13.4529 min, WR-2_NP	1.19	1.54667	0.9995	53.311	1.0243e-05	0.00015852
RI2011.0, 11.7182 min, WR-2_NP	RI2011.0, 11.7182 min, WR-2_NP	0.645	0.775667	1.00067	52.039	1.1321e-05	0.00016724
Adenosine	Adenosine, 4TMS derivative	1.38667	2.82	1.00083	51.103	1.2205e-05	0.00017246
RI2097.6, 12.3621 min, WR-2_P	RI2097.6, 12.3621 min, WR-2_P	1.44	0.947	0.999	42.338	2.6409e-05	0.00035762
HC-Like3	HC-Like3	0.874667	1.34	1.00083	41.731	2.8005e-05	0.00036407
.alpha.-Tocopherol	.alpha.-Tocopherol, TMS derivative	2.13	0.500667	0.999333	41.046	2.9953e-05	0.00037442
RI1213.9, 4.2975 min, WR-2_P	RI1213.9, 4.2975 min, WR-2_P	0.947333	2.78667	0.999833	37.192	4.4586e-05	0.00053669
RI1998.4, 11.6230 min, WR-2_P	RI1998.4, 11.6230 min, WR-2_P	0.639333	0.672667	1.00117	35.792	5.1994e-05	0.0006035
RI2717.0, 16.4535 min, WR-2_NP	RI2717.0, 16.4535 min, WR-2_NP	0.936	1.40667	1	35.285	5.5043e-05	0.00061686
RI1899.7, 10.8193 min, WR-2_P	RI1899.7, 10.8193 min, WR-2_P	0.795667	0.1852	0.999333	34.118	6.2937e-05	0.00065982
RI2100.2, 12.3817 min, WR-2_NP	RI2100.2, 12.3817 min, WR-2_NP	0.694667	2.23333	1.00017	34.379	6.1058e-05	0.00065982
RI1796.8, 9.9791 min, WR-2_P	RI1796.8, 9.9791 min, WR-2_P	1.88333	0.909667	0.999	31.26	8.8952e-05	0.00090342
RI1990.6, 11.5593 min, WR-2_P	RI1990.6, 11.5593 min, WR-2_P	0.918333	0.79	1	28.078	0.0001353	0.0013325
RI1430.1, 6.5505 min, WR-2_NP	RI1430.1, 6.5505 min, WR-2_NP	0.993667	1.45333	0.999667	27.721	0.00014218	0.0013591
2-Amino-4-nitrophenol	2-Amino-4-nitrophenol, 2TMS derivative	0.644333	0.683333	0.9995	27.273	0.00015143	0.0014061
Asparagine	Asparagine	1.4	1.24667	1.0005	25.521	0.00019544	0.0017167
L-Methionine	L-Methionine, 2TMS derivative	1.093	2.07333	1.002	25.654	0.00019161	0.0017167
RI2990.8, 17.9954 min, WR-2_NP	RI2990.8, 17.9954 min, WR-2_NP	1.29	0.562667	0.999167	24.894	0.00021492	0.0018381
RI3033.5, 18.2187 min, WR-2_P	RI3033.5, 18.2187 min, WR-2_P	0.999	2.76667	1.00017	23.892	0.00025122	0.0020935
RI3829.8, 21.9678 min, WR-2_NP	RI3829.8, 21.9678 min, WR-2_NP	0.848667	2.02667	0.998833	22.898	0.00029492	0.0023962
RI3627.1, 21.0894 min, WR-2_NP	RI3627.1, 21.0894 min, WR-2_NP	0.944333	2.17	1.00017	22.094	0.00033725	0.0026733
L-Phenylalanine	L-Phenylalanine, 2TMS derivative	1.35333	0.675333	1.00133	21.502	0.00037319	0.0028206
RI3239.5, 19.2705 min, WR-2_NP	RI3239.5, 19.2705 min, WR-2_NP	1.25667	0.419	1	21.54	0.00037074	0.0028206
RI1600.6, 8.2266 min, WR-2_P	RI1600.6, 8.2266 min, WR-2_P	4.56	1.84667	0.999833	20.958	0.00041044	0.0029643
RI1721.8, 9.3089 min, WR-2_P	RI1721.8, 9.3089 min, WR-2_P	0.418	0.195	1.0005	20.983	0.0004086	0.0029643
RI1591.9, 8.1417 min, WR-2_NP	RI1591.9, 8.1417 min, WR-2_NP	0.579333	0.580667	1.0005	20.743	0.00042637	0.0030124
L-5-Oxoproline	L-5-Oxoproline, , 2TMS derivative	1.53667	1.21667	1.0005	20.117	0.00047742	0.0032325
RI2295.1, 13.7757 min, WR-2_P	RI2295.1, 13.7757 min, WR-2_P	0.853	2.99333	0.999	20.213	0.00046913	0.0032325
Malic acid	Malic acid, 3TMS derivative	1.39	0.726	1.00167	19.758	0.00051002	0.0033828
RI2958.3, 17.8161 min, WR-2_P	RI2958.3, 17.8161 min, WR-2_P	0.844333	0.498333	0.9995	19.538	0.00053138	0.003454
RI1655.7, 8.7184 min, WR-2_P	RI1655.7, 8.7184 min, WR-2_P	1.203	2.05333	1.001	19.428	0.00054249	0.003457
RI1998.2, 11.6214 min, WR-2_NP	RI1998.2, 11.6214 min, WR-2_NP	0.992333	2.16	0.9995	17.984	0.00071785	0.0044866
RI2932.0, 17.6708 min, WR-2_P	RI2932.0, 17.6708 min, WR-2_P	0.778	0.659	1.00017	17.409	0.0008066	0.0049461
RI1681.4, 8.9487 min, WR-2_P	RI1681.4, 8.9487 min, WR-2_P	2.08667	0.891	0.998833	16.929	0.00089121	0.0053637
Citric acid	Citric acid, 4TMS	1.21667	0.609333	0.9995	16.674	0.00094048	0.0055574
L-Glutamine	L-Glutamine, 3TMS derivative	1.64333	1.09133	0.9995	16.45	0.00098655	0.0057255
RI2321.1, 13.9541 min, WR-2_P	RI2321.1, 13.9541 min, WR-2_P	1.60333	1.61667	1.00083	15.826	0.0011304	0.0063341
RI3533.9, 20.6671 min, WR-2_NP	RI3533.9, 20.6671 min, WR-2_NP	0.714333	1.69	0.999167	15.856	0.0011229	0.0063341
RI1787.6, 9.8968 min, WR-2_NP	RI1787.6, 9.8968 min, WR-2_NP	0.867	0.741333	1.00017	15.631	0.0011804	0.0065023
n/a	Phosphoric acid, 1-trimethylsilyloxymethyl-1,2-ethanediyl tetrakistrimethylsilyl ester	0.913667	1.81333	1.00067	15.102	0.0013308	0.0072082
RI1621.8, 8.4161 min, WR-2_NP	RI1621.8, 8.4161 min, WR-2_NP	0.627333	0.813	0.999667	14.603	0.0014946	0.0078348
RI2169.0, 12.8931 min, WR-2_NP	RI2169.0, 12.8931 min, WR-2_NP	0.623333	1.13533	1.00033	14.63	0.0014852	0.0078348
RI2019.5, 11.7811 min, WR-2_NP	RI2019.5, 11.7811 min, WR-2_NP	0.631667	1.45	1.00017	14.512	0.0015268	0.0078764
RI1336.2, 5.5837 min, WR-2_P	RI1336.2, 5.5837 min, WR-2_P	1.23667	0.19	1.00067	13.977	0.0017362	0.0088167
RI2031.1, 11.8677 min, WR-2_NP	RI2031.1, 11.8677 min, WR-2_NP	0.644333	0.714	1	13.702	0.0018577	0.0091476
RI3103.9, 18.5823 min, WR-2_P	RI3103.9, 18.5823 min, WR-2_P	0.416667	1.57	1.00083	13.745	0.0018377	0.0091476
RI2759.9, 16.7066 min, WR-2_P	RI2759.9, 16.7066 min, WR-2_P	2.02333	0.842667	1.00017	13.466	0.0019696	0.0095542
RI1521.3, 7.4476 min, WR-2_NP	RI1521.3, 7.4476 min, WR-2_NP	0.826333	0.428667	1.00183	12.993	0.0022211	0.010616
Stigmasteryl glucoside	Stigmasteryl glucoside	0	0.18	1.00033	12.935	0.0022547	0.01062
2-Palmitoylglycerol	2-Palmitoylglycerol, 2TMS derivative	1.00933	0.539667	0.999	12.766	0.0023555	0.010936
Heptadecanoic acid	Heptadecanoic acid, TMS Like	0.975	1.34667	1.00033	12.71	0.0023905	0.010943
RI1346.5, 5.6924 min, WR-2_P	RI1346.5, 5.6924 min, WR-2_P	1.23	0.563667	1.0005	12.327	0.0026447	0.011938
RI2546.4, 15.4232 min, ZR-2_NP	RI2546.4, 15.4232 min, ZR-2_NP	0.887667	0.493	0.998667	12.266	0.0026885	0.011969
RI1207.5, 4.2297 min, ZR-2_NP	RI1207.5, 4.2297 min, ZR-2_NP	1.01867	1.48667	1	11.91	0.0029609	0.013004
Lignoceric acid	Lignoceric acid, TMS derivative	0.989	1.58667	1.00033	11.689	0.0031477	0.01364
n/a	2-8Z,11Z-Heptadeca-8,11-dien-1-yl-4,5-dihydrooxazole	1.04667	1.49	0.998667	11.554	0.0032688	0.013978
RI4032.1, 22.8071 min, WR-2_NP	RI4032.1, 22.8071 min, WR-2_NP	0.91	1.86	1.00117	11.452	0.0033631	0.014195
RI1661.6, 8.7711 min, WR-2_P	RI1661.6, 8.7711 min, WR-2_P	1.57667	0.456	0.999833	11.231	0.0035816	0.014923
RI3022.4, 18.1618 min, WR-2_P	RI3022.4, 18.1618 min, WR-2_P	1.34667	1.75667	1.002	11.168	0.0036466	0.015002
RI2061.9, 12.0962 min, WR-2_P	RI2061.9, 12.0962 min, WR-2_P	1.21333	0.883	1	11.083	0.0037367	0.01518
Glucose	Glucose	0.945	0.786667	0.9995	10.814	0.0040415	0.016216
RI1966.5, 11.3631 min, WR-2_NP	RI1966.5, 11.3631 min, WR-2_NP	0.537667	2.19667	0.999167	10.504	0.0044307	0.017419
RI3250.3, 19.3231 min, WR-2_P	RI3250.3, 19.3231 min, WR-2_P	1.014	1.39	0.999167	10.491	0.0044486	0.017419
2-linoleoylglycerol	2-linoleoylglycerol, 2TMS derivative	1.25	0.665333	1.00067	10.433	0.0045268	0.017514
RI2962.0, 17.8365 min, WR-2_NP	RI2962.0, 17.8365 min, WR-2_NP	0.726333	2.09	0.999833	10.32	0.0046844	0.017911
RI1755.4, 9.6096 min, WR-2_P	RI1755.4, 9.6096 min, WR-2_P	1.28667	1.00267	0.9995	10.11	0.0049947	0.018658
Sucrose	Sucrose, 8TMS derivative	1.01633	0.697667	0.9995	10.129	0.0049662	0.018658
Tyrosine	Tyrosine, 3TMS derivative	2.55	4.92333	0.999833	9.8104	0.005483	0.02025
RI1460.9, 6.8538 min, WR-2_NP	RI1460.9, 6.8538 min, WR-2_NP	0.733333	1.49667	1.00117	9.6282	0.0058084	0.021211
1-Oleoyl Lysophosphaditic Acid	1-Oleoyl Lysophosphaditic Acid, 3O-TMS - Like	1.063	2.05	1.00067	9.4104	0.0062292	0.022264
Butanedioic acid	Butanedioic acid, 2TMS derivative	1.101	0.719	0.999	9.3803	0.0062902	0.022264
Glycerol monostearate	Glycerol monostearate, 2TMS derivative	1.10167	1.94	1	9.341	0.0063709	0.022264
Stearic acid	Stearic acid, TMS derivative	0.915	1.13667	0.998667	9.3547	0.0063427	0.022264
1-Eicosanol	1-Eicosanol, TMS derivative	0.978333	1.42	1.00067	9.0471	0.0070169	0.024261
L-Proline	L-Proline, 2TMS derivative	0.594333	0.494667	1.00033	8.9605	0.0072225	0.024709
RI1199.3, 4.1438 min, WR-2_NP	RI1199.3, 4.1438 min, WR-2_NP	0.953	1.21333	1	8.7727	0.0076937	0.025778
RI2377.9, 14.3432 min, WR-2_P	RI2377.9, 14.3432 min, WR-2_P	1.28333	0.938	0.998833	8.7749	0.0076881	0.025778
RI2537.3, 15.3652 min, WR-2_NP	RI2537.3, 15.3652 min, WR-2_NP	1.07133	1.72333	1	8.7162	0.0078428	0.026009
RI1195.8, 4.1073 min, WR-2_NP	RI1195.8, 4.1073 min, WR-2_NP	0.921333	1.23	1.001	8.2757	0.0091353	0.02999
RI4082.6, 23.0170 min, WR-2_NP	RI4082.6, 23.0170 min, WR-2_NP	1.65	1.7	1.001	8.207	0.0093599	0.03042
RI1755.4, 9.6097 min, WR-2_NP	RI1755.4, 9.6097 min, WR-2_NP	1.10067	0.376	1.0005	8.0845	0.0097768	0.03146
RI2430.2, 14.6864 min, WR-2_P	RI2430.2, 14.6864 min, WR-2_P	0.904333	0.702	1.001	7.9016	0.010443	0.033273
Hexacosanoic acid	Hexacosanoic acid, TMS derivative	1.11667	1.78667	0.999333	7.7636	0.010982	0.033992
RI1710.1, 9.2044 min, WR-2_NP	RI1710.1, 9.2044 min, WR-2_NP	0.698333	1.42667	0.999	7.7934	0.010863	0.033992
RI2426.2, 14.6609 min, WR-2_P	RI2426.2, 14.6609 min, WR-2_P	1.59	0.0443333	0.999167	7.786	0.010892	0.033992
RI2057.7, 12.0656 min, WR-2_NP	RI2057.7, 12.0656 min, WR-2_NP	0.603333	1.65	1	7.7376	0.011087	0.033994
RI1335.6, 5.5778 min, WR-2_NP	RI1335.6, 5.5778 min, WR-2_NP	0.539	2	0.999333	7.6805	0.011323	0.034074
RI1800.3, 10.0106 min, WR-2_NP	RI1800.3, 10.0106 min, WR-2_NP	0.653333	3.17333	0.99915	7.6862	0.011299	0.034074
RI2703.6, 16.3745 min, WR-2_NP	RI2703.6, 16.3745 min, WR-2_NP	1.09	1.22333	0.998833	7.6464	0.011467	0.03419
RI1720.0, 9.2928 min, WR-2_NP	RI1720.0, 9.2928 min, WR-2_NP	0.776	0.907	1.00133	7.3307	0.012909	0.038141
RI1502.7, 7.2650 min, ZSR-2_NP	RI1502.7, 7.2650 min, ZSR-2_NP	1.21667	1.29	1.0015	7.0937	0.01414	0.041402
RI1581.4, 8.0380 min, WR-2_NP	RI1581.4, 8.0380 min, WR-2_NP	0.882	0.488667	1.00133	7.0075	0.014623	0.042434
RI1969.8, 11.3902 min, WR-2_P	RI1969.8, 11.3902 min, WR-2_P	0.596	0.755	0.998333	6.8138	0.015784	0.045397
1-Tetradecene	1-Tetradecene	0.919	1.22333	0.999833	6.7318	0.016309	0.046496
RI2167.7, 12.8837 min, WR-2_NP	RI2167.7, 12.8837 min, WR-2_NP	0.981667	1.44	0.999333	6.7009	0.016513	0.046666
9,12-Octadecadienoic acid, methyl ester	9,12-Octadecadienoic acid, methyl ester	0.592667	0.379	1.00017	6.6684	0.01673	0.046873
RI1823.8, 10.2018 min, WR-2_NP	RI1823.8, 10.2018 min, WR-2_NP	0.541	0.505	1.00017	6.6308	0.016986	0.047182
Pentacosanoic acid	Pentacosanoic acid, trimethylsilyl ester	1.38333	1.74	0.999167	6.5874	0.017287	0.047613
RI1826.8, 10.2265 min, ZR-2_P	RI1826.8, 10.2265 min, ZR-2_P	1.99667	0.583867	0.999167	6.5066	0.017866	0.048793
RI1475.7, 6.9990 min, WR-2_P	RI1475.7, 6.9990 min, WR-2_P	1.78	1.32667	0.999667	6.4341	0.018405	0.049846
4-aminobutyric acid	4-bistrimethylsilylamino-4-keto-2-trimethylsilylaminobutyric acid trimethylsilyl ester	1.42	0.699333	0.998833	6.2673	0.019723	0.052321
Glycine	Glycine, 3TMS derivative	1.6	1.63333	1.00083	6.2421	0.019932	0.052321
RI1235.5, 4.5245 min, ZR-2_NP	RI1235.5, 4.5245 min, ZR-2_NP	0.569667	1.09	1.00033	6.2018	0.020272	0.052321
RI1261.6, 4.7988 min, WR-2_NP	RI1261.6, 4.7988 min, WR-2_NP	1.07	1.62333	1.00017	6.2003	0.020285	0.052321
RI1427.2, 6.5224 min, WR-2_P	RI1427.2, 6.5224 min, WR-2_P	0.821	1.03533	1	6.2495	0.019871	0.052321
RI2568.3, 15.5623 min, ZSS-2_P	RI2568.3, 15.5623 min, ZSS-2_P	0.587	0.422667	1.00083	6.2011	0.020278	0.052321
RI2017.0, 11.7623 min, WR-2_P	RI2017.0, 11.7623 min, WR-2_P	0.883	0.827	0.999333	6.0925	0.021231	0.054331
D-Mannose-6-phosphate	D-Mannose, 2,3,4,5-tetrakis-O-trimethylsilyl-, O-methyloxime, 6-bistrimethylsilyl phosphate	1.23	0.737667	1	6.0442	0.021671	0.054923
RI2339.3, 14.0790 min, WS-2_P	RI2339.3, 14.0790 min, WS-2_P	1.52667	1.81	1.00017	6.0303	0.0218	0.054923
RI1541.8, 7.6489 min, WR-2_NP	RI1541.8, 7.6489 min, WR-2_NP	0.934667	1.16	1	6.0049	0.022039	0.055098
RI4101.5, 23.0951 min, WR-2_NP	RI4101.5, 23.0951 min, WR-2_NP	1.17767	2.93333	0.998667	5.9691	0.02238	0.055523
n/a	1-Trimethylsilylmethyldimethylsilyloxyhexane	0.601667	1.36	0.999667	5.9366	0.022696	0.055583
RI2514.7, 15.2225 min, WR-2_NP	RI2514.7, 15.2225 min, WR-2_NP	0.845667	1.12167	0.998333	5.9314	0.022746	0.055583
RI1626.6, 8.4586 min, WR-2_NP	RI1626.6, 8.4586 min, WR-2_NP	0.645	0.622	1.0015	5.8876	0.023181	0.056222
RI3712.0, 21.4597 min, WR-2_P	RI3712.0, 21.4597 min, WR-2_P	1.64	2.22	1.00083	5.7983	0.0241	0.058018
n/a	UK Sterol	1.01667	0.540333	1.00183	5.7374	0.024752	0.059149
Docosanoic acid	Docosanoic acid, TMS ester	1.03067	1.28667	1.00033	5.7194	0.024948	0.059184
RI1880.2, 10.6605 min, WR-2_NP	RI1880.2, 10.6605 min, WR-2_NP	1.34	0.258467	1.00083	5.6837	0.025345	0.059631
RI2119.8, 12.5270 min, WR-2_NP	RI2119.8, 12.5270 min, WR-2_NP	0.501333	0.801667	0.999333	5.6695	0.025504	0.059631
RI1571.6, 7.9420 min, WR-2_NP	RI1571.6, 7.9420 min, WR-2_NP	0.540333	1.04333	0.9995	5.5025	0.027477	0.063787
Decanedioic acid, dibutyl ester	Decanedioic acid, dibutyl ester	1.09	1.15	1.0015	5.4839	0.027708	0.063865
Alpha-ketoglutaric acid	Alpha-ketoglutaric acid meox2 2TMS	1.26633	0.803333	1.00017	5.4664	0.027928	0.063919
RI4001.2, 22.6788 min, WR-2_NP	RI4001.2, 22.6788 min, WR-2_NP	0.992667	2.95667	0.999667	5.3268	0.029758	0.067632
RI1481.0, 7.0517 min, WR-2_NP	RI1481.0, 7.0517 min, WR-2_NP	0.671	0.964333	0.999	5.2709	0.030531	0.068907
RI2753.8, 16.6703 min, ZR-2_NP	RI2753.8, 16.6703 min, ZR-2_NP	0.501	1.52333	1.00033	5.1477	0.032326	0.072454
RI2687.4, 16.2785 min, WR-2_NP	RI2687.4, 16.2785 min, WR-2_NP	1.1	0.853	1.00033	5.044	0.033936	0.075543
RI2656.3, 16.0950 min, WR-2_NP	RI2656.3, 16.0950 min, WR-2_NP	1.14333	0.809667	1.00167	5.0249	0.034244	0.075709
L-Histidine	L-Histidine, N,1-bistrimethylsilyl-, trimethylsilyl ester	0.9	1.55667	1.00133	4.989	0.034831	0.076488
RI1483.0, 7.0704 min, WR-2_NP	RI1483.0, 7.0704 min, WR-2_NP	1.37333	0.312667	1.00017	4.9548	0.035402	0.077218
RI2587.5, 15.6837 min, WR-2_P	RI2587.5, 15.6837 min, WR-2_P	1.80133	0.711	1.00033	4.8913	0.036491	0.079064
Niacin	Niacin, TMS derivative	1.00567	0.712	0.999667	4.8301	0.037581	0.07983
RI1469.1, 6.9344 min, WR-2_P	RI1469.1, 6.9344 min, WR-2_P	0.539667	0.623667	1.0005	4.8563	0.03711	0.07983
RI1511.0, 7.3457 min, WR-2_NP	RI1511.0, 7.3457 min, WR-2_NP	1.09333	1.63667	1.00017	4.8384	0.03743	0.07983
Cycloartenol	Cycloartenol, TMS	1.02367	0.749667	1.002	4.7799	0.038505	0.081261
9,12-Octadecadienoic acid	9,12-Octadecadienoic acid Z,Z-, TMS - like 2	0.887667	0.865	0.998833	4.7367	0.039322	0.081448
L-Aspartic acid	L-Aspartic acid, N-trimethylsilyl-, 1-methyl ester, 4-trimethylsilyl ester isomer 2	1.16667	1.04	1.00033	4.7382	0.039293	0.081448
RI1519.6, 7.4306 min, WR-2_P	RI1519.6, 7.4306 min, WR-2_P	0.843333	0.585	0.999	4.7266	0.039515	0.081448
RI2716.7, 16.4517 min, WR-2_P	RI2716.7, 16.4517 min, WR-2_P	1.015	0.585667	1.00083	4.7224	0.039596	0.081448
RI1372.9, 5.9702 min, WR-2_P	RI1372.9, 5.9702 min, WR-2_P	1.15767	1.7	0.999667	4.6469	0.041088	0.083461
RI1909.7, 10.9009 min, WR-2_P	RI1909.7, 10.9009 min, WR-2_P	1.53233	0.591667	1	4.6476	0.041074	0.083461
1-Monolinolein	1-Monolinolein, 2TMS derivative	0.996667	0.829	1.00067	4.5938	0.042179	0.085143
Benzoic Acid	Benzoic Acid, TMS derivative	0.713333	1.37	1	4.5189	0.043779	0.087829
4-Coumaric acid	4-Coumaric acid, 2TMS derivative	1.00333	1.74	0.999	4.4794	0.044653	0.087953
RI1397.2, 6.2260 min, WR-2_NP	RI1397.2, 6.2260 min, WR-2_NP	0.984333	1.20667	0.999833	4.5027	0.044135	0.087953
RI2126.7, 12.5788 min, ZSR-2_NP	RI2126.7, 12.5788 min, ZSR-2_NP	2.10333	0.488	0.999333	4.4838	0.044555	0.087953
RI1191.3, 4.0596 min, WR-2_P	RI1191.3, 4.0596 min, WR-2_P	1.54	0.850667	0.999333	4.422	0.045961	0.089813
RI1905.4, 10.8661 min, WR-2_NP	RI1905.4, 10.8661 min, WR-2_NP	0.828	0.445	0.999333	4.412	0.046191	0.089813
RI2049.4, 12.0036 min, WR-2_P	RI2049.4, 12.0036 min, WR-2_P	1.99667	0.884333	0.999667	4.402	0.046426	0.089813
RI2038.0, 11.9187 min, WR-2_NP	RI2038.0, 11.9187 min, WR-2_NP	0.366	0.196333	1.00017	4.3649	0.047306	0.090972
Glycerol	Glycerol, 3TMS derivative	0.867333	0.898667	1	4.3351	0.048028	0.091818
n/a	Decanedioic acid, bis2-ethylhexyl ester - like	0.895667	1.14667	1.0005	4.1327	0.05331	0.10073
Isofucosterol	Isofucosterol, TMS	0.89	0.800667	1.0005	4.1345	0.053258	0.10073
RI3018.5, 18.1415 min, WR-2_NP	RI3018.5, 18.1415 min, WR-2_NP	0.974333	1.29667	1.0015	4.0866	0.054608	0.10259
1-Palmitoyllysophosphatidic acid	1-Palmitoyllysophosphatidic acid, 3O-TMS	1.07033	1.78	0.999167	3.9147	0.05981	0.11171
L-Glutamic acid	L-Glutamic acid, 3TMS derivative	0.948667	0.869333	1.00067	3.7853	0.06413	0.11788
RI1479.8, 7.0398 min, WR-2_NP	RI1479.8, 7.0398 min, WR-2_NP	1.01567	1.23667	0.998667	3.7834	0.064197	0.11788
RI2109.6, 12.4513 min, WR-2_NP	RI2109.6, 12.4513 min, WR-2_NP	0.535333	1.14567	1	3.7887	0.064014	0.11788
n/a	2,3,4-Trihydroxybutyric acid tetrakistrimethylsilyl deriv., , R,R-	1.45633	0.556667	0.9995	3.7477	0.065457	0.11906
Hexadecanoic acid	Hexadecanoic acid, methyl ester	0.685	0.910667	0.999333	3.7444	0.065576	0.11906
RI2841.4, 17.1713 min, WR-2_P	RI2841.4, 17.1713 min, WR-2_P	1.06	1.08333	0.999667	3.6848	0.067752	0.12233
RI2106.8, 12.4309 min, WR-2_NP	RI2106.8, 12.4309 min, WR-2_NP	1.64667	1.22333	1.00033	3.6545	0.068891	0.1237
Raffinose	Raffinose TMS	1.34333	1.16667	1.00117	3.5786	0.071852	0.12831
RI2101.7, 12.3927 min, ZS-2_NP	RI2101.7, 12.3927 min, ZS-2_NP	0.697	0.787333	1.00033	3.465	0.076581	0.13527
RI1321.5, 5.4291 min, WR-2_NP	RI1321.5, 5.4291 min, WR-2_NP	0.805333	0.193	1.0005	3.3428	0.082097	0.14422
RI1242.6, 4.5991 min, WR-2_NP	RI1242.6, 4.5991 min, WR-2_NP	0.891333	1.42	1.00017	3.2905	0.084608	0.14784
Docosanol	Docosanol, TMS derivative	0.934	1.15333	0.999833	3.1763	0.090422	0.15549
RI1496.4, 7.2029 min, WR-2_P	RI1496.4, 7.2029 min, WR-2_P	1.153	1.56333	0.999167	3.1903	0.089683	0.15549
RI3894.9, 22.2379 min, WR-2_NP	RI3894.9, 22.2379 min, WR-2_NP	1.53	0.611	0.999667	3.1771	0.09038	0.15549
RI2262.1, 13.5498 min, WR-2_NP	RI2262.1, 13.5498 min, WR-2_NP	0.932333	1.14	1.00083	3.1536	0.091633	0.15559
RI2290.5, 13.7444 min, ZSR-2_NP	RI2290.5, 13.7444 min, ZSR-2_NP	1.07133	1.482	1.00067	3.1484	0.091918	0.15559
RI2343.3, 14.1062 min, WR-2_P	RI2343.3, 14.1062 min, WR-2_P	1.09433	0.742	1.00017	3.1598	0.0913	0.15559
RI2576.0, 15.6107 min, WR-2_NP	RI2576.0, 15.6107 min, WR-2_NP	1.17167	0.644667	1.00017	3.1346	0.092667	0.15605
RI1307.6, 5.2830 min, WR-2_NP	RI1307.6, 5.2830 min, WR-2_NP	1.00467	1.34667	0.9995	3.0886	0.095218	0.15951
RI3059.8, 18.3548 min, ZSR-2_P	RI3059.8, 18.3548 min, ZSR-2_P	1.36333	0.619333	1.00033	2.858	0.10941	0.18234
n/a	2,2,8,8-Tetramethyl-3,7-dioxa-2,8-disilanonan-5-yl tetracosanoate	0.843	0.770333	0.9995	2.6353	0.12564	0.20832
1,2-Dipalmitin	1,2-Dipalmitin, TMS derivative - Like	1.16	1.42333	1.00017	2.6237	0.12656	0.20878
RI1161.6, 3.7470 min, WR-2_NP	RI1161.6, 3.7470 min, WR-2_NP	0.976333	1.23667	1.00033	2.6077	0.12784	0.20879
RI1686.5, 8.9937 min, WR-2_NP	RI1686.5, 8.9937 min, WR-2_NP	0.73	1.35667	0.9995	2.6142	0.12732	0.20879
Nonanoic acid	Nonanoic acid, TMS derivative	0.833667	1.16667	1.00083	2.5389	0.13356	0.21596
11-Eicosenoic acid	11-Eicosenoic acid, Z-, TMS derivative	1.05867	1.61333	0.999167	2.5224	0.13498	0.217
RI2306.0, 13.8504 min, WR-2_P	RI2306.0, 13.8504 min, WR-2_P	1.10333	1.31633	0.9995	2.5159	0.13554	0.217
4-Aminobutanoic acid	4-Aminobutanoic acid, 3TMS derivative	1.22667	1.17667	1.00017	2.4812	0.1386	0.22081
RI1515.9, 7.3941 min, WR-2_NP	RI1515.9, 7.3941 min, WR-2_NP	0.963333	1.12767	0.999333	2.4611	0.14041	0.22203
RI1945.9, 11.1958 min, ZSR-2_NP	RI1945.9, 11.1958 min, ZSR-2_NP	0.392333	0.225333	1	2.4576	0.14073	0.22203
RI2894.5, 17.4643 min, WR-2_P	RI2894.5, 17.4643 min, WR-2_P	1.35667	0.498667	0.999167	2.4282	0.14344	0.22521
Azelaic acid	Azelaic acid, bistrimethylsilyl ester	0.760333	1.25	0.999167	2.4137	0.1448	0.22625
RI1555.1, 7.7798 min, WR-2_NP	RI1555.1, 7.7798 min, WR-2_NP	0.925667	1.19167	1.0015	2.347	0.15125	0.2352
RI3138.8, 18.7624 min, WR-2_P	RI3138.8, 18.7624 min, WR-2_P	1.22133	0.731333	0.999333	2.3139	0.15458	0.23924
RI2184.8, 13.0112 min, WR-2_NP	RI2184.8, 13.0112 min, WR-2_NP	0.609333	1.48267	0.999333	2.3057	0.15543	0.2394
RI2204.6, 13.1556 min, WR-2_NP	RI2204.6, 13.1556 min, WR-2_NP	1.081	0.841333	0.9995	2.2951	0.15652	0.23995
RI2147.6, 12.7342 min, WR-2_NP	RI2147.6, 12.7342 min, WR-2_NP	0.771667	1.04033	0.999167	2.2773	0.15838	0.24167
RI2455.2, 14.8452 min, WR-2_P	RI2455.2, 14.8452 min, WR-2_P	0.607667	0.636667	1	2.2498	0.1613	0.24497
RI2682.2, 16.2480 min, ZR-2_NP	RI2682.2, 16.2480 min, ZR-2_NP	0.793333	0.864	1	2.2309	0.16335	0.24692
1-Heptadecene	1-Heptadecene	0.381333	1.076	1.00083	2.1506	0.17241	0.25822
RI1926.1, 11.0343 min, WR-2_NP	RI1926.1, 11.0343 min, WR-2_NP	1.51767	1	0.9995	2.153	0.17214	0.25822
n/a	1-Cyclohexene-1-carboxylic acid, 3,4,5-tristrimethylsilyloxy-, trimethylsilyl ester, 3R-3.alpha.,4.alpha.,5.beta.-	1.28333	1.118	1	2.1166	0.17644	0.26184
RI2162.2, 12.8429 min, WR-2_P	RI2162.2, 12.8429 min, WR-2_P	1.397	1.31	0.999833	2.1215	0.17585	0.26184
RI1166.7, 3.8005 min, WR-2_P	RI1166.7, 3.8005 min, WR-2_P	1.30567	0.631667	1.0005	2.0834	0.18049	0.26663
RI2252.1, 13.4810 min, WR-2_NP	RI2252.1, 13.4810 min, WR-2_NP	1.14067	1.53333	1.00083	2.0228	0.18815	0.27669
Ethanimidic acid	Ethanimidic acid, N-trimethylsilyl-, trimethylsilyl ester	0.867333	2	1	1.9618	0.19628	0.27836
Hexadecanenitrile	Hexadecanenitrile	0.856667	1.06333	1.00033	1.9932	0.19203	0.27836
Octanoic acid	Octanoic acid, trimethylsilyl ester	0.382333	1.17667	1.00033	1.9693	0.19525	0.27836
Monomethyl phosphoric acid	Phosphoric acid, bistrimethylsilylmonomethyl ester	0.937	0.629333	1.00017	1.9799	0.19381	0.27836
Putrescine	Putrescine, 4TMS derivative	1.22333	1.17667	0.997333	1.9801	0.1938	0.27836
RI1704.7, 9.1568 min, WR-2_P	RI1704.7, 9.1568 min, WR-2_P	1.11667	1.11667	0.999667	1.9532	0.19746	0.27836
RI1990.2, 11.5559 min, WR-2_NP	RI1990.2, 11.5559 min, WR-2_NP	0.549667	0.986333	1.001	1.9503	0.19785	0.27836
RI2084.6, 12.2652 min, WR-2_P	RI2084.6, 12.2652 min, WR-2_P	0.948	0.806333	0.999833	1.9968	0.19156	0.27836
RI2670.2, 16.1774 min, WR-2_NP	RI2670.2, 16.1774 min, WR-2_NP	0.643	0.904667	0.999333	1.9701	0.19515	0.27836
RI2861.9, 17.2843 min, WR-2_P	RI2861.9, 17.2843 min, WR-2_P	0.882333	1.04633	1.00083	1.9539	0.19735	0.27836
Sulfuric acid	Sulfuric acid, 2TMS derivative	1.25667	1.20667	1.00117	1.9383	0.19951	0.27949
1-Margaroleoyl Lysophosphatidic Acid	1-Margaroleoyl Lysophosphatidic Acid, 3O-TMS - Like	1.073	1.48533	0.9995	1.9172	0.20249	0.28245
D-Gluconic acid	D-Gluconic acid, 6TMS derivative	2.68667	1.7949	0.9995	1.902	0.20466	0.28425
RI1889.4, 10.7361 min, WR-2_P	RI1889.4, 10.7361 min, WR-2_P	0.883333	0.7	1.00033	1.8528	0.2119	0.29305
RI3220.5, 19.1779 min, WR-2_P	RI3220.5, 19.1779 min, WR-2_P	1.52333	1.39333	0.9995	1.7592	0.22654	0.31197
RI2663.5, 16.1375 min, WR-2_NP	RI2663.5, 16.1375 min, WR-2_NP	1.212	1.32	0.999333	1.6427	0.24651	0.33804
RI2004.7, 11.6706 min, WR-2_NP	RI2004.7, 11.6706 min, WR-2_NP	0.579333	0.652333	1.001	1.6279	0.24921	0.3403
RI2180.6, 12.9797 min, WR-2_NP	RI2180.6, 12.9797 min, WR-2_NP	0.810333	1.30167	1	1.6157	0.25145	0.34192
RI1367.0, 5.9074 min, WR-2_NP	RI1367.0, 5.9074 min, WR-2_NP	0.885667	0.978333	1.00033	1.542	0.26555	0.3596
RI2748.3, 16.6378 min, WR-2_NP	RI2748.3, 16.6378 min, WR-2_NP	0.739667	0.560333	0.999667	1.5224	0.26946	0.36339
RI1426.5, 6.5158 min, ZR-2_NP	RI1426.5, 6.5158 min, ZR-2_NP	0.715667	0.955667	1.0005	1.4806	0.27805	0.37341
RI2226.8, 13.3077 min, WR-2_NP	RI2226.8, 13.3077 min, WR-2_NP	1.21333	0.853	1.00133	1.4716	0.27993	0.3737
RI2702.8, 16.3694 min, ZSR-2_NP	RI2702.8, 16.3694 min, ZSR-2_NP	1.08467	0.896667	1.00083	1.4686	0.28057	0.3737
RI1532.4, 7.5564 min, WR-2_NP	RI1532.4, 7.5564 min, WR-2_NP	0.651667	0.747667	1.0015	1.461	0.28217	0.37431
Dodecanoic acid	Dodecanoic acid, trimethylsilyl ester	1.15567	0.742333	0.999333	1.443	0.28605	0.37791
b-Alanine	b-Alanine, 3TMS derivative	1.33	1.47667	1.00033	1.3962	0.29639	0.3877
Campesteryl glucoside	Campesteryl glucoside	1.16033	1.23733	1.00017	1.3882	0.29823	0.3877
RI1153.3, 3.6595 min, WR-2_P	RI1153.3, 3.6595 min, WR-2_P	0.747	0.730667	1	1.396	0.29645	0.3877
RI2888.5, 17.4312 min, WR-2_P	RI2888.5, 17.4312 min, WR-2_P	0.928333	0.0722	0.999667	1.3933	0.29705	0.3877
RI3725.8, 21.5201 min, WR-2_NP	RI3725.8, 21.5201 min, WR-2_NP	1.005	1.27333	1	1.3405	0.30933	0.40053
Palmitic Acid	Palmitic Acid, TMS derivative	1.009	0.936	1.00083	1.3282	0.31228	0.40274
1-Monopalmitin	1-Monopalmitin, 2TMS derivative	1.107	0.973333	0.999	1.2994	0.31932	0.4102
RI2617.4, 15.8656 min, ZSR-2_NP	RI2617.4, 15.8656 min, ZSR-2_NP	1.12733	0.859	0.999833	1.2834	0.32333	0.4137
RI3905.4, 22.2812 min, WR-2_NP	RI3905.4, 22.2812 min, WR-2_NP	1.13633	1.56767	1.00033	1.2635	0.32838	0.41853
RI1991.4, 11.5661 min, WR-2_NP	RI1991.4, 11.5661 min, WR-2_NP	0.417333	0.804333	1.001	1.2202	0.3397	0.43126
Tetradecanoic acid	Tetradecanoic acid, trimethylsilyl ester	1.14167	1.09	1	1.1856	0.34911	0.44148
RI1470.0, 6.9430 min, WR-2_NP	RI1470.0, 6.9430 min, WR-2_NP	0.675333	0.270667	1.00008	1.1322	0.36425	0.45885
RI2403.1, 14.5149 min, WR-2_NP	RI2403.1, 14.5149 min, WR-2_NP	1.15	1.2	0.999833	1.127	0.36577	0.45898
RI2806.3, 16.9776 min, WS-2_NP	RI2806.3, 16.9776 min, WS-2_NP	1.224	0.777	0.999833	1.0889	0.37712	0.4714
RI1189.3, 4.0384 min, WR-2_P	RI1189.3, 4.0384 min, WR-2_P	0.331333	1.08367	0.999833	1.0841	0.37859	0.47142
1-Tetracosene	1-Tetracosene	1.092	0.683667	0.999833	1.0087	0.40248	0.49736
RI3705.0, 21.4292 min, WR-2_NP	RI3705.0, 21.4292 min, WR-2_NP	1.21367	1.50667	0.999167	1.0131	0.40102	0.49736
RI2668.1, 16.1646 min, WR-2_P	RI2668.1, 16.1646 min, WR-2_P	1.22367	0.411	0.9995	0.93992	0.42588	0.52429
Cholesterol	Cholesterol, TMS derivative	1.11333	1.16667	0.999667	0.9272	0.43039	0.52784
Glyceric acid	Glyceric acid, 3TMS	1.07967	0.964333	1.00067	0.91884	0.43339	0.52952
RI1814.7, 10.1279 min, ZSR-2_NP	RI1814.7, 10.1279 min, ZSR-2_NP	0.848	1.24267	1.00033	0.88618	0.44534	0.54208
RI1212.2, 4.2797 min, WR-2_NP	RI1212.2, 4.2797 min, WR-2_NP	0.952667	1.05	0.999667	0.83308	0.46565	0.56468
RI1616.3, 8.3668 min, WR-2_NP	RI1616.3, 8.3668 min, WR-2_NP	0.826	0.926	1.00017	0.82781	0.46772	0.56509
RI1808.9, 10.0802 min, WR-2_P	RI1808.9, 10.0802 min, WR-2_P	1.30067	2.469	0.9995	0.81974	0.47092	0.56663
RI2213.2, 13.2142 min, WR-2_NP	RI2213.2, 13.2142 min, WR-2_NP	0.453333	1.32167	1	0.81583	0.47248	0.56663
RI2485.1, 15.0348 min, WR-2_NP	RI2485.1, 15.0348 min, WR-2_NP	0.968	0.744	1.001	0.79136	0.48239	0.57639
RI1929.7, 11.0640 min, WR-2_NP	RI1929.7, 11.0640 min, WR-2_NP	0.796667	0.948	0.999167	0.76192	0.49466	0.58888
D 16-834	D 16-834	1.15967	1.27667	1.00033	0.70545	0.51927	0.61593
9-Octadecynenitrile	9-Octadecynenitrile	1.33833	0.967	0.9985	0.65196	0.54398	0.63901
D-Ribofuranose	D---Ribofuranose, tetrakistrimethylsilyl ether isomer 2	1.31067	0.696667	1.0005	0.65438	0.54283	0.63901
RI2367.2, 14.2702 min, ZR-2_P	RI2367.2, 14.2702 min, ZR-2_P	1.10767	1.062	0.999333	0.65058	0.54463	0.63901
RI1819.8, 10.1694 min, WR-2_P	RI1819.8, 10.1694 min, WR-2_P	1.05767	0.512	1.00027	0.61775	0.56053	0.6553
Butyl caprylate	Butyl caprylate	0.967333	1.02667	1	0.6072	0.56576	0.65891
RI3505.6, 20.5372 min, WR-2_NP	RI3505.6, 20.5372 min, WR-2_NP	1.12233	1.29333	1.00183	0.60336	0.56768	0.65891
Octadecadienoic acid	Octadecadienoic acid, trimethylsilyloxy-, trimethylsilyl ester	1.32867	1.067	0.999833	0.59382	0.57248	0.66212
RI1985.3, 11.5160 min, WR-2_P	RI1985.3, 11.5160 min, WR-2_P	0.977	1.209	1.00083	0.54899	0.59571	0.68655
RI1508.8, 7.3244 min, WR-2_NP	RI1508.8, 7.3244 min, WR-2_NP	0.994333	1.17567	1.00083	0.52309	0.60966	0.70014
RI2809.7, 16.9963 min, WR-2_P	RI2809.7, 16.9963 min, WR-2_P	0.953	1.22	0.999667	0.51168	0.61593	0.70485
Glycerol-3-phosphate	Phosphoric acid, bistrimethylsilyl 2,3-bistrimethylsilyloxypropyl ester	0.855	0.943667	0.998833	0.49372	0.62596	0.71132
RI1565.0, 7.8774 min, WR-2_P	RI1565.0, 7.8774 min, WR-2_P	0.756667	0.824333	1.00117	0.49373	0.62596	0.71132
Oleic acid	Oleic acid, trimethylsilyl ester	0.994	0.937667	0.999667	0.48735	0.62957	0.71292
RI1490.0, 7.1393 min, ZR-2_P	RI1490.0, 7.1393 min, ZR-2_P	1.05967	0.873	1.0005	0.4623	0.64399	0.72673
RI2382.6, 14.3755 min, WR-2_P	RI2382.6, 14.3755 min, WR-2_P	1.066	0.872333	0.998833	0.45812	0.64644	0.72697
n/a	Z-Docos-9-enenitrile - like	1.367	0.658667	1.001	0.44508	0.65415	0.7331
RI1224.4, 4.4080 min, WR-2_NP	RI1224.4, 4.4080 min, WR-2_NP	1.11267	1.00467	1	0.43215	0.6619	0.73923
RI4222.0, 23.5955 min, WR-2_NP	RI4222.0, 23.5955 min, WR-2_NP	1.18833	1.278	0.999167	0.42308	0.66741	0.74283
RI2192.0, 13.0648 min, ZSR-2_NP	RI2192.0, 13.0648 min, ZSR-2_NP	1.03933	0.956667	0.998667	0.41306	0.67355	0.74712
RI2167.7, 12.8837 min, WR-2_P	RI2167.7, 12.8837 min, WR-2_P	0.843667	0.899333	1.0015	0.39813	0.68284	0.7528
RI2364.7, 14.2532 min, WR-2_NP	RI2364.7, 14.2532 min, WR-2_NP	1.17067	1.037	0.999833	0.39738	0.68331	0.7528
Phosphorylethanolamine	Phosphorylethanolamine, 4TMS derivative	1.347	1.40433	0.999667	0.34166	0.71942	0.7899
Urea	1-Trimethylsilyl-3-trimethylsilyloxyurea	1.03867	0.791	1	0.32527	0.73048	0.79935
Eicosanoic acid	Eicosanoic acid, trimethylsilyl ester	1.067	1.08433	0.9995	0.29693	0.7501	0.81806
RI2301.0, 13.8165 min, WR-2_NP	RI2301.0, 13.8165 min, WR-2_NP	0.828	0.976333	1.00033	0.2717	0.76812	0.83491
n/a	UK Sterol 1	1.016	0.934	0.999333	0.23778	0.79318	0.85928
Fructose	Fructose	0.995	1.05667	1.00067	0.23065	0.79857	0.86224
Pentadecanoic acid	Pentadecanoic acid, TMS derivative	0.865667	0.966	0.9985	0.22644	0.80178	0.86284
RI1401.3, 6.2676 min, WR-2_NP	RI1401.3, 6.2676 min, WR-2_NP	1.09633	1.06967	0.9995	0.20423	0.81895	0.8761
RI2162.7, 12.8464 min, WR-2_NP	RI2162.7, 12.8464 min, WR-2_NP	1.04233	0.983	0.999667	0.20354	0.81949	0.8761
Ferulic acid	Ferulic acid, trimethylsiloxy, trimethylsilyl ester	0.816333	1.14333	1.00067	0.19902	0.82304	0.87701
RI3109.7, 18.6123 min, ZR-2_NP	RI3109.7, 18.6123 min, ZR-2_NP	1.23467	1.121	1.00083	0.18102	0.83739	0.88938
RI1656.8, 8.7287 min, WR-2_NP	RI1656.8, 8.7287 min, WR-2_NP	0.932333	0.908	1.0015	0.16823	0.84776	0.89747
RI2828.8, 17.1016 min, ZS-2_NP	RI2828.8, 17.1016 min, ZS-2_NP	1.072	1.01433	1.00017	0.14612	0.86606	0.91386
RI1593.5, 8.1570 min, WR-2_NP	RI1593.5, 8.1570 min, WR-2_NP	0.950333	1.09567	1.00017	0.1128	0.89457	0.94005
RI2636.0, 15.9752 min, WR-2_NP	RI2636.0, 15.9752 min, WR-2_NP	1.03067	1.064	1.00017	0.11041	0.89666	0.94005
RI1415.7, 6.4095 min, WR-2_NP	RI1415.7, 6.4095 min, WR-2_NP	1.04433	0.951667	0.999833	0.098808	0.90689	0.94771
RI2211.4, 13.2023 min, WR-2_P	RI2211.4, 13.2023 min, WR-2_P	0.995	1.049	1.00033	0.091434	0.91346	0.95152
RI2612.2, 15.8350 min, WR-2_NP	RI2612.2, 15.8350 min, WR-2_NP	0.980333	0.883333	0.998833	0.078314	0.9253	0.96077
RI1218.7, 4.3478 min, ZSS-2_NP	RI1218.7, 4.3478 min, ZSS-2_NP	0.968	0.93	0.999833	0.074907	0.9284	0.96093
RI1917.6, 10.9655 min, WR-2_NP	RI1917.6, 10.9655 min, WR-2_NP	0.926667	1.02467	1.00067	0.066084	0.9365	0.96623
RI1546.2, 7.6923 min, WR-2_NP	RI1546.2, 7.6923 min, WR-2_NP	0.938333	0.982333	1.00017	0.051294	0.95028	0.97734
RI1672.9, 8.8723 min, WR-2_NP	RI1672.9, 8.8723 min, WR-2_NP	0.913333	0.975667	1.0005	0.041834	0.95921	0.98342
RI2138.0, 12.6628 min, WR-2_P	RI2138.0, 12.6628 min, WR-2_P	1.08333	0.973667	0.998667	0.028837	0.97166	0.99305
Octacosane	Octacosane	1.02933	0.944	1.00033	0.019722	0.98051	0.99569
Pyroglutamic acid	Pyroglutamic acid, TMS derivative	0.953667	1.00833	1.001	0.011775	0.98831	0.99569
RI1189.5, 4.0410 min, WR-2_NP	RI1189.5, 4.0410 min, WR-2_NP	1.05533	0.985	1.00033	0.010505	0.98956	0.99569
RI1250.4, 4.6807 min, WR-2_NP	RI1250.4, 4.6807 min, WR-2_NP	1.03233	1.04133	1.00117	0.015327	0.98482	0.99569
RI1813.7, 10.1193 min, WR-2_P	RI1813.7, 10.1193 min, WR-2_P	0.915667	0.892667	0.998567	0.019246	0.98098	0.99569
RI1436.6, 6.6151 min, WR-2_NP	RI1436.6, 6.6151 min, WR-2_NP	1.00633	1.00667	0.999333	0.0024249	0.99758	0.99897
RI2900.9, 17.4993 min, ZSR-2_NP	RI2900.9, 17.4993 min, ZSR-2_NP	0.991333	0.987667	0.999167	0.0010273	0.99897	0.99897

## Sheet: Maize-Shoot
Supplementary Data 2. Mean fold change of metabolites in maize
		Mean fold change of metabolites in maize shoot (Relative to W22)			ANOVA analysis
Common Name	Library Name	Zmcyp710a8-1	Zmcyp710a8-2	W22	F statistic	p value	FDR
RI2062.7, 12.1022 min, WR-2_NP	RI2062.7, 12.1022 min, WR-2_NP	0.592333	5.01667	0.999333	5996.1	8.6614e-15	2.9882e-12
RI3542.2, 20.7054 min, WS-2_P	RI3542.2, 20.7054 min, WS-2_P	0.309	15.3	1.00033	5116.7	1.7672e-14	3.0484e-12
RI1797.1, 9.9818 min, WR-2_NP	RI1797.1, 9.9818 min, WR-2_NP	0.834667	6.68333	0.999667	3961.2	5.585e-14	6.4228e-12
RI1167.3, 3.8065 min, WS-2_P	RI1167.3, 3.8065 min, WS-2_P	1.35333	27.5	1	1495.6	4.4348e-12	3.825e-10
Linolenic acid	Linolenic acid-like	0.915	3.29	1.0005	1071.1	1.9814e-11	1.3073e-09
Stigmasterol	Stigmasterol, TMS derivative	0	0.505	1.00033	1038.7	2.2737e-11	1.3073e-09
RI1672.9, 8.8723 min, WR-2_NP	RI1672.9, 8.8723 min, WR-2_NP	1.098	5.9	0.999	930.51	3.7221e-11	1.8345e-09
RI1621.8, 8.4161 min, WR-2_NP	RI1621.8, 8.4161 min, WR-2_NP	0.84	4.99667	0.998833	828.86	6.2476e-11	2.6176e-09
RI1917.6, 10.9655 min, WR-2_NP	RI1917.6, 10.9655 min, WR-2_NP	0.751667	4.17333	0.999667	812.56	6.8285e-11	2.6176e-09
Glycerol monostearate	Glycerol monostearate, 2TMS derivative	0.643667	3.43333	0.999167	655.64	1.7827e-10	6.1504e-09
RI3094.2, 18.5322 min, WS-2_NP	RI3094.2, 18.5322 min, WS-2_NP	0.253333	0.233333	0.999667	536.97	4.3487e-10	1.3639e-08
1-Dotriacontanol	Dotriacontyl trimethylsilyl ether	0.871667	3.19667	0.998833	421.72	1.2768e-09	3.4455e-08
RI1723.2, 9.3218 min, ZSS-2_NP	RI1723.2, 9.3218 min, ZSS-2_NP	0.961333	20.5333	0.9995	420.14	1.2983e-09	3.4455e-08
L-Histidine	L-Histidine, N,1-bistrimethylsilyl-, trimethylsilyl ester	0.249333	0.424	1.00017	365.33	2.4179e-09	5.9584e-08
Sitosterol	Beta-Sitosterol, TMS derivative	1.52333	1.33667	1.00033	323.44	4.1531e-09	9.552e-08
RI2377.9, 14.3432 min, WR-2_P	RI2377.9, 14.3432 min, WR-2_P	0.993667	2.22	1.00017	311.3	4.9213e-09	1.0611e-07
RI1286.4, 5.0604 min, WR-2_NP	RI1286.4, 5.0604 min, WR-2_NP	9.64	0.311667	0.9991	291.65	6.5715e-09	1.3336e-07
L-Isoleucine	L-Isoleucine, N-trimethylsilyl-, trimethylsilyl ester	3.15333	5.17667	1.00033	268.95	9.4077e-09	1.8031e-07
RI3444.6, 20.2570 min, ZSS-2_NP	RI3444.6, 20.2570 min, ZSS-2_NP	1.58333	11.5667	0.998767	257.84	1.1339e-08	2.059e-07
Heptadecanoic acid	Heptadecanoic acid, TMS Like	2.33667	3.22333	0.999833	240.85	1.5325e-08	2.5541e-07
RI1720.0, 9.2928 min, WR-2_NP	RI1720.0, 9.2928 min, WR-2_NP	0.929	2.28	0.999833	240.07	1.5547e-08	2.5541e-07
RI3103.9, 18.5823 min, WR-2_P	RI3103.9, 18.5823 min, WR-2_P	0.309	2.93	1.001	227.08	1.9876e-08	3.1169e-07
RI1990.6, 11.5593 min, WR-2_P	RI1990.6, 11.5593 min, WR-2_P	0.919667	1.75667	1.0005	216.63	2.4466e-08	3.6699e-07
RI2004.7, 11.6706 min, WR-2_NP	RI2004.7, 11.6706 min, WR-2_NP	0.725333	2.96667	0.999667	189.81	4.3774e-08	6.2925e-07
RI2841.4, 17.1713 min, WR-2_P	RI2841.4, 17.1713 min, WR-2_P	1.08333	1.67333	1	163.85	8.3458e-08	1.1074e-06
RI3513.6, 20.5738 min, ZSS-2_NP	RI3513.6, 20.5738 min, ZSS-2_NP	0.928	16.8667	0.9995	164.94	8.1072e-08	1.1074e-06
RI2382.6, 14.3755 min, WS-2_P	RI2382.6, 14.3755 min, WS-2_P	0.859333	1.62667	0.9985	154.27	1.0866e-07	1.3884e-06
RI2169.0, 12.8931 min, WR-2_NP	RI2169.0, 12.8931 min, WR-2_NP	0.818333	2.90667	1.001	143.62	1.4847e-07	1.8294e-06
RI1913.0, 10.9281 min, WS-2_P	RI1913.0, 10.9281 min, WS-2_P	0.285333	0.399667	1.00017	142.18	1.5515e-07	1.8458e-06
n/a	2-8Z,11Z-Heptadeca-8,11-dien-1-yl-4,5-dihydrooxazole	0.904333	1.42333	0.999333	140.14	1.6525e-07	1.9004e-06
RI3642.1, 21.1547 min, WS-2_NP	RI3642.1, 21.1547 min, WS-2_NP	2.27	25.8667	0.998667	138.36	1.7475e-07	1.9448e-06
Neophytadiene	Neophytadiene	1.05833	2.20667	1	125.97	2.628e-07	2.7679e-06
RI2011.0, 11.7182 min, WR-2_NP	RI2011.0, 11.7182 min, WR-2_NP	0.730333	1.9	0.999333	125.76	2.6476e-07	2.7679e-06
RI1571.6, 7.9420 min, WR-2_NP	RI1571.6, 7.9420 min, WR-2_NP	0.686667	3.17667	1.0005	116.84	3.6424e-07	3.696e-06
L-Valine	L-Valine, 2TMS derivative	1.32333	2.08667	1.0005	116.04	3.7531e-07	3.6995e-06
RI3250.3, 19.3231 min, WR-2_P	RI3250.3, 19.3231 min, WR-2_P	0.884667	1.54	1.00067	113.82	4.081e-07	3.9109e-06
n/a	Neophytadiene - Like	1.04333	2.29667	1.00067	101.94	6.5692e-07	6.1254e-06
RI2861.9, 17.2843 min, WR-2_P	RI2861.9, 17.2843 min, WR-2_P	0.819333	1.91	1.0005	98.868	7.494e-07	6.8037e-06
RI1735.7, 9.4338 min, WS-2_P	RI1735.7, 9.4338 min, WS-2_P	0.871	3.29667	0.999	97.172	8.0732e-07	7.1417e-06
RI1905.4, 10.8661 min, WR-2_NP	RI1905.4, 10.8661 min, WR-2_NP	0.915333	6.31	1	85.209	1.4181e-06	1.2112e-05
RI3533.9, 20.6671 min, WR-2_NP	RI3533.9, 20.6671 min, WR-2_NP	1.00867	1.92	1.00033	84.912	1.4394e-06	1.2112e-05
D-Mannose-6-hosphate	D-Mannose, 2,3,4,5-tetrakis-O-trimethylsilyl-, O-methyloxime, 6-bistrimethylsilyl phosphate	1.01167	2.09333	1	80.143	1.8421e-06	1.5131e-05
RI2248.0, 13.4529 min, WR-2_NP	RI2248.0, 13.4529 min, WR-2_NP	1.2	0.434333	1.00083	75.701	2.3478e-06	1.8409e-05
RI2306.0, 13.8504 min, WR-2_P	RI2306.0, 13.8504 min, WR-2_P	0.680667	0.366667	1.00033	75.898	2.3219e-06	1.8409e-05
RI1591.9, 8.1417 min, WR-2_NP	RI1591.9, 8.1417 min, WR-2_NP	0.946	3.58333	1.0005	75.185	2.4169e-06	1.8529e-05
RI2993.7, 18.0115 min, WS-2_P	RI2993.7, 18.0115 min, WS-2_P	0.685667	3.07667	1.00033	70.661	3.144e-06	2.358e-05
RI2888.5, 17.4312 min, WR-2_P	RI2888.5, 17.4312 min, WR-2_P	1.18333	1.73	0.999167	70.091	3.2536e-06	2.3883e-05
Palmitic Acid	Palmitic Acid, TMS derivative	0.978667	1.32667	0.999	66.753	3.9979e-06	2.8148e-05
RI1805.8, 10.0548 min, WR-2_NP	RI1805.8, 10.0548 min, WR-2_NP	0.850333	2.44	1.00033	67.016	3.9323e-06	2.8148e-05
RI1984.6, 11.5108 min, ZS-2_NP	RI1984.6, 11.5108 min, ZS-2_NP	0.819	2.62667	0.999833	63.077	5.074e-06	3.5011e-05
Docosanol	Docosanol, TMS derivative	1.07	1.57333	0.999667	62.718	5.1972e-06	3.5158e-05
2-Amino-4-nitrophenol	2-Amino-4-nitrophenol, 2TMS derivative	0.72	0.724	0.998333	62.207	5.379e-06	3.5687e-05
RI2119.8, 12.5270 min, WR-2_NP	RI2119.8, 12.5270 min, WR-2_NP	0.684	1.49	1.0005	60.376	6.0963e-06	3.9684e-05
RI1213.9, 4.2975 min, WR-2_P	RI1213.9, 4.2975 min, WR-2_P	1.34667	6.84667	1	59.135	6.6502e-06	4.2487e-05
n/a	1-Cyclohexene-1-carboxylic acid, 3,4,5-tristrimethylsilyloxy-, trimethylsilyl ester, 3R-3.alpha.,4.alpha.,5.beta.-	1.25667	0.304667	1	56.53	8.0259e-06	4.8578e-05
Myo-inositol	Myo-inositol	1.19	1.26	0.9995	56.553	8.0126e-06	4.8578e-05
RI2097.6, 12.3621 min, WR-2_P	RI2097.6, 12.3621 min, WR-2_P	1.60333	0.966333	0.999167	56.533	8.0246e-06	4.8578e-05
Glycerol 3-phosphate	Phosphoric acid, bistrimethylsilyl 2,3-bistrimethylsilyloxypropyl ester	1.08333	1.74333	0.998167	55.692	8.5417e-06	5.0809e-05
RI2017.0, 11.7623 min, WR-2_P	RI2017.0, 11.7623 min, WR-2_P	0.988667	1.45	0.999667	53.985	9.7224e-06	5.6851e-05
RI3034.2, 18.2224 min, ZS-2_P	RI3034.2, 18.2224 min, ZS-2_P	0.960333	0.275667	0.999667	51.502	1.1818e-05	6.7955e-05
Putrescine	Putrescine, 4TMS derivative	0.849	1.71	1.0015	49.328	1.4122e-05	7.8583e-05
RI1335.6, 5.5778 min, WR-2_NP	RI1335.6, 5.5778 min, WR-2_NP	0.692333	2.56333	0.999	49.419	1.4015e-05	7.8583e-05
RI2868.7, 17.3217 min, WS-2_P	RI2868.7, 17.3217 min, WS-2_P	0.902667	2.87333	0.9995	47.879	1.5968e-05	8.7445e-05
RI1998.4, 11.6230 min, WR-2_P	RI1998.4, 11.6230 min, WR-2_P	0.719667	0.727	1.00033	47.681	1.6242e-05	8.7556e-05
RI2378.0, 14.3441 min, WS-2_P	RI2378.0, 14.3441 min, WS-2_P	0.961	1.71333	0.9995	46.743	1.7623e-05	9.3539e-05
Campesterol	Campesterol, TMS derivative	1.25667	1.10333	0.999167	46.451	1.8082e-05	9.4521e-05
RI1475.7, 6.9990 min, WR-2_P	RI1475.7, 6.9990 min, WR-2_P	0.735	3.27333	0.999333	45.729	1.9282e-05	9.9288e-05
RI1990.2, 11.5559 min, WR-2_NP	RI1990.2, 11.5559 min, WR-2_NP	0.663333	1.34667	1.002	42.845	2.5161e-05	0.00012765
RI1909.7, 10.9009 min, WR-2_P	RI1909.7, 10.9009 min, WR-2_P	1.63333	0.372667	0.9985	41.443	2.8806e-05	0.00014403
RI1178.2, 3.9220 min, WR-2_P	RI1178.2, 3.9220 min, WR-2_P	4.86	6.61333	0.998333	37.661	4.24e-05	0.00020897
RI1929.7, 11.0640 min, WR-2_NP	RI1929.7, 11.0640 min, WR-2_NP	0.905	2.17667	1.00067	37.203	4.4534e-05	0.0002164
.alpha.-Tocopherol	.alpha.-Tocopherol, TMS derivative	1.2	0.561	0.998333	36.881	4.6115e-05	0.00022097
RI2922.9, 17.6207 min, WR-2_P	RI2922.9, 17.6207 min, WR-2_P	1.31333	0.278333	1.0005	33.936	6.4287e-05	0.00030351
Sitosteryl glucoside	Sitosteryl glucoside	1.46333	2.06	1.00017	33.829	6.5101e-05	0.00030351
RI1672.6, 8.8697 min, WS-2_P	RI1672.6, 8.8697 min, WS-2_P	0.966667	0.473333	1.00017	33.106	7.0924e-05	0.00032625
RI3481.4, 20.4260 min, ZSS-2_NP	RI3481.4, 20.4260 min, ZSS-2_NP	1.07233	2.20333	0.9985	32.776	7.3795e-05	0.00033499
Ferulic acid	Ferulic acid, trimethylsiloxy, trimethylsilyl ester	1.02267	2.41333	0.999	32.632	7.5087e-05	0.00033643
Isofucosterol	Isofucosterol, TMS	1.037	0.547	1.00117	31.916	8.1965e-05	0.00035795
RI3741.0, 21.5863 min, ZS-2_NP	RI3741.0, 21.5863 min, ZS-2_NP	0.713333	2.58333	0.999167	31.924	8.1882e-05	0.00035795
RI3863.6, 22.1079 min, ZS-2_NP	RI3863.6, 22.1079 min, ZS-2_NP	1.05267	1.63333	1.0005	31.539	8.5894e-05	0.00037042
RI2092.9, 12.3272 min, WS-2_NP	RI2092.9, 12.3272 min, WS-2_NP	1.41	3.56	0.999667	30.961	9.2378e-05	0.00039346
RI1966.5, 11.3631 min, WR-2_NP	RI1966.5, 11.3631 min, WR-2_NP	0.649	5.68333	1.00067	29.623	0.00010984	0.00046214
RI2084.6, 12.2652 min, WR-2_P	RI2084.6, 12.2652 min, WR-2_P	1.02467	1.46667	1.0005	28.132	0.0001343	0.00055825
L-Aspartic acid	L-Aspartic acid, N-trimethylsilyl-, 1-methyl ester, 4-trimethylsilyl ester isomer 2	0.708333	0.657667	1.00083	27.749	0.00014162	0.00058167
Asparagine	Asparagine, TMS	0.528667	0.713333	0.998833	27.397	0.00014879	0.0006031
Butyl caprylate	Butyl caprylate	0.921333	0.775333	0.998667	27.144	0.00015422	0.0006031
Eicosanoic acid, eicosyl ester	Eicosanoic acid, eicosyl ester	0.885333	1.95	1.00017	27.115	0.00015486	0.0006031
Nonacos-1-ene	Nonacos-1-ene	0.283667	1.09667	1.00067	27.085	0.00015551	0.0006031
RI1997.3, 11.6137 min, WR-2_NP	RI1997.3, 11.6137 min, WR-2_NP	0.884	4.24333	1.00033	27.082	0.00015558	0.0006031
n/a	Decanedioic acid, bis2-ethylhexyl ester - like	0.977	1.44333	1.001	26.065	0.00018028	0.00069106
RI1687.3, 9.0013 min, ZS-2_NP	RI1687.3, 9.0013 min, ZS-2_NP	0.961333	1.78	1.00017	25.123	0.00020754	0.00078683
RI2109.6, 12.4513 min, WR-2_NP	RI2109.6, 12.4513 min, WR-2_NP	0.616	1.8	1.00017	25.014	0.00021103	0.00079135
Malic acid	Malic acid, 3TMS derivative	0.885333	0.717333	1.00067	24.501	0.00022834	0.00084707
RI1985.3, 11.5160 min, WR-2_P	RI1985.3, 11.5160 min, WR-2_P	1.25	2.17	1.00033	23.734	0.00025764	0.00094558
Phosphate	Silanol, trimethyl-, phosphate 31	0.961	1.25667	1	23.444	0.00026988	0.00098011
L-Proline	L-Proline, 2TMS derivative	0.695333	0.609333	0.999667	22.173	0.00033278	0.0011959
Glycine	Glycine, 3TMS derivative	0.729333	2.11333	1.0005	22.05	0.00033973	0.0012083
2,5-Dimethoxyphenol	2,5-Dimethoxyphenol, TMS	0.764333	1.69333	1.00117	21.88	0.00034971	0.0012311
RI2031.1, 11.8677 min, WR-2_NP	RI2031.1, 11.8677 min, WR-2_NP	1.008	4.01667	0.999167	21.414	0.00037894	0.0013206
RI3728.7, 21.5329 min, ZSS-2_NP	RI3728.7, 21.5329 min, ZSS-2_NP	1.16667	1.87667	1.00217	20.067	0.00048184	0.0016624
Eicosanoic acid	Eicosanoic acid, trimethylsilyl ester	1.08667	1.30333	0.999667	19.573	0.00052796	0.0018034
L-5-Oxoproline	L-5-Oxoproline, , 2TMS derivative	0.806	0.677333	0.998667	18.853	0.00060527	0.0020472
RI1545.3, 7.6838 min, WR-2_NP	RI1545.3, 7.6838 min, WR-2_NP	0.260667	0.857	1.00033	18.75	0.00061734	0.0020678
RI1899.7, 10.8193 min, WR-2_P	RI1899.7, 10.8193 min, WR-2_P	0.451333	0.593	1.00067	18.66	0.00062831	0.0020843
Tyrosine	Tyrosine, 3TMS derivative	1.7	1.34	0.999333	18.424	0.00065793	0.0021618
Glycerol	Glycerol, 3TMS derivative	0.994667	0.624667	1.001	18.305	0.00067342	0.0021918
RI1609.2, 8.3031 min, WR-2_NP	RI1609.2, 8.3031 min, WR-2_NP	0.793	1.55333	1.00033	18.054	0.00070786	0.0022824
RI3134.2, 18.7387 min, WS-2_P	RI3134.2, 18.7387 min, WS-2_P	0.61	1.43333	0.999667	17.945	0.00072351	0.0023112
1,2-Dipalmitin	1,2-Dipalmitin, TMS derivative - Like	1.21333	0.469333	0.999833	17.677	0.00076362	0.002417
RI2624.4, 15.9072 min, WR-2_NP	RI2624.4, 15.9072 min, WR-2_NP	1.02733	7.43667	0.9995	17.397	0.00080861	0.0025361
RI2223.3, 13.2839 min, WR-2_NP	RI2223.3, 13.2839 min, WR-2_NP	0.779333	1.34667	1.00183	16.895	0.00089749	0.0027895
RI2703.6, 16.3745 min, WR-2_NP	RI2703.6, 16.3745 min, WR-2_NP	0.896	1.13333	1.00017	16.535	0.00096871	0.002984
RI2717.0, 16.4535 min, WR-2_NP	RI2717.0, 16.4535 min, WR-2_NP	0.960667	1.24333	0.999833	16.374	0.0010029	0.0030618
Campesteryl glucoside	Campesteryl glucoside	2.45	2.08667	0.999833	15.842	0.0011263	0.0034086
RI2149.3, 12.7470 min, WR-2_NP	RI2149.3, 12.7470 min, WR-2_NP	1.21667	1.83	0.998833	15.77	0.0011445	0.0034335
RI2523.9, 15.2804 min, ZSS-2_NP	RI2523.9, 15.2804 min, ZSS-2_NP	0.817333	2.98667	1	15.667	0.0011711	0.0034533
Serine	Serine	0.797667	1.13333	0.9995	15.671	0.00117	0.0034533
RI3074.5, 18.4304 min, ZSS-2_NP	RI3074.5, 18.4304 min, ZSS-2_NP	2.16	1.05867	0.9995	15.541	0.0012046	0.003522
11,14-Octadecadienoic acid	11,14-Octadecadienoic acid, methyl ester	1.35667	0.368667	0.9995	15.444	0.0012311	0.0035693
L-Glutamic acid	L-Glutamic acid, 3TMS derivative	0.945667	0.700667	1	15.14	0.0013191	0.0037926
RI2809.7, 16.9963 min, WR-2_P	RI2809.7, 16.9963 min, WR-2_P	1.17	0.558	1.00033	14.304	0.0016045	0.0045747
RI2501.4, 15.1377 min, ZSS-2_NP	RI2501.4, 15.1377 min, ZSS-2_NP	1.32	0.830667	1.00217	13.685	0.0018655	0.0052753
RI3172.4, 18.9358 min, WS-2_P	RI3172.4, 18.9358 min, WS-2_P	0.869667	0.318667	0.9995	13.519	0.0019439	0.0054525
L-Threonine	L-Threonine, 3TMS derivative	1.57333	1.13	1.00033	13.178	0.0021185	0.0058942
RI4101.5, 23.0951 min, WR-2_NP	RI4101.5, 23.0951 min, WR-2_NP	1.21	1.62	0.999833	12.856	0.0023008	0.0063503
1-Monolinolein	1-Monolinolein, 2TMS derivative	1.25333	0.713333	1.00233	12.81	0.0023287	0.0063761
RI1483.0, 7.0704 min, WR-2_NP	RI1483.0, 7.0704 min, WR-2_NP	0.493667	0.908	0.999667	12.712	0.0023889	0.0064335
RI1616.3, 8.3668 min, WR-2_NP	RI1616.3, 8.3668 min, WR-2_NP	0.863333	1.78667	1.00083	12.686	0.0024056	0.0064335
RI3518.9, 20.5984 min, ZSS-2_NP	RI3518.9, 20.5984 min, ZSS-2_NP	0.805	2.53333	0.999167	12.737	0.0023733	0.0064335
RI2002.7, 11.6562 min, WR-2_NP	RI2002.7, 11.6562 min, WR-2_NP	0.403333	0.508667	1.00017	12.649	0.0024286	0.0064451
RI3330.3, 19.7124 min, ZSS-2_NP	RI3330.3, 19.7124 min, ZSS-2_NP	1.18667	1.38667	1.00117	12.262	0.0026913	0.0070876
n/a	Carbonic acid, eicosyl vinyl ester	0.976667	1.48333	0.999833	12.114	0.002801	0.0073208
RI1721.8, 9.3089 min, WR-2_P	RI1721.8, 9.3089 min, WR-2_P	0.421667	0.649	1.001	12.02	0.0028733	0.0074534
Fructose	Fructose	1.11333	0.860333	0.998333	11.906	0.0029648	0.0075768
RI1886.4, 10.7115 min, WS-2_P	RI1886.4, 10.7115 min, WS-2_P	1.07467	1.92	0.998333	11.917	0.0029555	0.0075768
RI1755.4, 9.6096 min, WR-2_P	RI1755.4, 9.6096 min, WR-2_P	0.443	0.231333	1.00083	11.846	0.0030137	0.007645
RI4001.2, 22.6788 min, WR-2_NP	RI4001.2, 22.6788 min, WR-2_NP	1.38	0.328667	0.998167	11.768	0.0030796	0.0077551
9,12-Octadecadienoic acid Z,Z-	9,12-Octadecadienoic acid Z,Z-, TMS derivative	1.183	1.69333	0.999667	11.699	0.0031389	0.0078472
RI2301.0, 13.8165 min, WR-2_NP	RI2301.0, 13.8165 min, WR-2_NP	0.588	1.06333	1.001	11.453	0.0033624	0.0083455
RI1288.8, 5.0851 min, WR-2_NP	RI1288.8, 5.0851 min, WR-2_NP	0.532	1.54967	1.00167	11.06	0.0037618	0.0092702
Tetradecanoic acid	Tetradecanoic acid, trimethylsilyl ester	0.958667	0.810333	0.998667	11.03	0.0037943	0.0092839
RI1823.8, 10.2018 min, WR-2_NP	RI1823.8, 10.2018 min, WR-2_NP	0.859	6.23333	0.999833	10.953	0.0038808	0.0094287
Hexacosanoic acid	Hexacosanoic acid, TMS derivative	1.2	0.862667	1.00017	10.735	0.0041368	0.0099805
Butanedioic acid	Butanedioic acid, 2TMS derivative	0.723	0.609	1.00033	10.626	0.0042729	0.010237
RI1199.3, 4.1438 min, WR-2_NP	RI1199.3, 4.1438 min, WR-2_NP	0.991	1.15333	0.999167	10.381	0.0045988	0.010942
Dodecanoic acid	Dodecanoic acid, trimethylsilyl ester	0.893333	1.09	1.00033	10.153	0.0049293	0.011648
Phosphorylethanolamine	Phosphorylethanolamine, 4TMS derivative	1.25333	3.58667	1.00017	10.061	0.0050713	0.011902
Octacosane	Octacosane	1.23667	1.14	0.998833	9.9798	0.0052003	0.012122
RI1397.2, 6.2260 min, WR-2_NP	RI1397.2, 6.2260 min, WR-2_NP	0.906	1.18	0.999167	9.8033	0.0054953	0.012724
Triacontanoate	Trimethylsilyl triacontanoate	1.42667	1.18	0.999167	9.5345	0.0059851	0.013766
RI1969.8, 11.3902 min, WR-2_P	RI1969.8, 11.3902 min, WR-2_P	0.531	0.854667	0.998667	9.4553	0.0061395	0.014027
RI1966.9, 11.3664 min, WR-2_P	RI1966.9, 11.3664 min, WR-2_P	0.49	0.556667	0.999167	9.39	0.0062704	0.014232
RI1661.6, 8.7711 min, WR-2_P	RI1661.6, 8.7711 min, WR-2_P	0.452333	0.477333	0.9985	9.1222	0.0068445	0.015434
RI1755.4, 9.6097 min, WR-2_NP	RI1755.4, 9.6097 min, WR-2_NP	0.824	0.458333	0.999667	8.9643	0.0072133	0.01616
RI2471.9, 14.9507 min, WS-2_P	RI2471.9, 14.9507 min, WS-2_P	0.728	1.61667	1.00083	8.8687	0.0074483	0.016578
Stigmasteryl glucoside	Stigmasteryl glucoside	0	0.443333	1.001	8.7736	0.0076913	0.01701
11-Eicosenoic acid, Z-	11-Eicosenoic acid, Z-, TMS derivative	1.49667	1.46	1.0005	8.662	0.0079894	0.017556
Glucose	Glucose	0.991333	0.797667	0.998833	8.3982	0.0087514	0.019109
RI1783.6, 9.8611 min, WS-2_P	RI1783.6, 9.8611 min, WS-2_P	0.775	1.57333	1.00167	8.2384	0.0092563	0.020084
RI1427.2, 6.5224 min, WR-2_P	RI1427.2, 6.5224 min, WR-2_P	1.35333	0.602333	1.00067	7.933	0.010324	0.022262
RI2590.7, 15.7043 min, ZSS-2_NP	RI2590.7, 15.7043 min, ZSS-2_NP	0.861333	2.38333	1.00133	7.898	0.010456	0.022406
RI2167.8, 12.8846 min, WS-2_P	RI2167.8, 12.8846 min, WS-2_P	1.043	1.52667	1.00033	7.8359	0.010695	0.022776
2-Palmitoylglycerol	2-Palmitoylglycerol, 2TMS derivative	1.29933	0.548667	0.999667	7.7875	0.010886	0.023041
RI2753.3, 16.6675 min, WS-2_NP	RI2753.3, 16.6675 min, WS-2_NP	2.08667	3.61333	0.999833	7.7425	0.011067	0.023281
Adenosine	Adenosine, 4TMS derivative	1.139	0.685	1.00033	7.6156	0.011598	0.024251
Citric acid	Citric acid, 4TMS	0.816	0.915667	1.00033	7.5437	0.011913	0.024736
RI2656.3, 16.0950 min, WR-2_NP	RI2656.3, 16.0950 min, WR-2_NP	1.14333	0.849	1.00133	7.5302	0.011974	0.024736
RI2592.1, 15.7129 min, ZS-2_P	RI2592.1, 15.7129 min, ZS-2_P	1.39333	2.30333	0.999667	7.5082	0.012073	0.024792
RI3705.0, 21.4292 min, WR-2_NP	RI3705.0, 21.4292 min, WR-2_NP	1.22	1.46333	0.998667	7.4163	0.012497	0.025512
RI2339.3, 14.0790 min, WS-2_P	RI2339.3, 14.0790 min, WS-2_P	0.609667	1.42667	1	7.3915	0.012615	0.025602
2-linoleoylglycerol	2-linoleoylglycerol, 2TMS derivative	1.71	0.816	1.00117	7.0873	0.014175	0.028599
HC-Like3	HC-Like3	0.901333	1.00133	1.00033	7.0319	0.014485	0.029053
RI1600.4, 8.2249 min, WS-2_NP	RI1600.4, 8.2249 min, WS-2_NP	0.924	1.31	0.999167	6.8561	0.015521	0.030952
1-Linolenoylglycerol	1-Linolenoylglycerol, 2TMS derivative	1.85333	0.784	0.9995	6.7919	0.015923	0.031041
RI1515.9, 7.3941 min, WR-2_NP	RI1515.9, 7.3941 min, WR-2_NP	0.914667	0.738667	1.001	6.8138	0.015784	0.031041
RI2343.3, 14.1062 min, WR-2_P	RI2343.3, 14.1062 min, WR-2_P	1.06733	1.28667	0.999667	6.7992	0.015876	0.031041
RI2637.3, 15.9828 min, ZSS-2_P	RI2637.3, 15.9828 min, ZSS-2_P	1.40333	1.64333	1.00033	6.7914	0.015925	0.031041
D 16-834	D 16-834	1.32333	1.32667	0.999833	6.7393	0.01626	0.031516
RI4222.0, 23.5955 min, WR-2_NP	RI4222.0, 23.5955 min, WR-2_NP	0.861	0.625333	0.998	6.6624	0.016771	0.032323
RI2061.9, 12.0962 min, WR-2_P	RI2061.9, 12.0962 min, WR-2_P	0.917667	1.62	1.00083	6.5501	0.017552	0.03364
RI1756.5, 9.6190 min, WS-2_P	RI1756.5, 9.6190 min, WS-2_P	1.06933	6.674	1.00033	6.3235	0.019267	0.036724
RI2932.0, 17.6708 min, WR-2_P	RI2932.0, 17.6708 min, WR-2_P	0.888333	1.11333	0.998333	6.2498	0.019868	0.037663
RI1861.1, 10.5052 min, ZSS-2_NP	RI1861.1, 10.5052 min, ZSS-2_NP	1.003	1.24333	1.00117	6.1154	0.021026	0.039423
RI4082.6, 23.0170 min, WR-2_NP	RI4082.6, 23.0170 min, WR-2_NP	1.5	0.523	1.00067	6.1252	0.020938	0.039423
RI3876.3, 22.1606 min, WS-2_NP	RI3876.3, 22.1606 min, WS-2_NP	1.74333	0.825	1.00133	6.0731	0.021406	0.03992
RI2268.0, 13.5898 min, ZSS-2_NP	RI2268.0, 13.5898 min, ZSS-2_NP	1.56	2.30667	1.00133	6.0567	0.021557	0.039984
n/a	4-bistrimethylsilylamino-4-keto-2-trimethylsilylaminobutyric acid trimethylsilyl ester	0.475	3.49033	1.00117	5.9692	0.022379	0.041288
RI2211.4, 13.2023 min, WR-2_P	RI2211.4, 13.2023 min, WR-2_P	0.948667	1.75667	1.00033	5.6638	0.025568	0.046672
RI2687.4, 16.2785 min, WR-2_NP	RI2687.4, 16.2785 min, WR-2_NP	1.11667	1.16	1.0005	5.666	0.025543	0.046672
1-Hexacosanol	1-Hexacosanol, TMS derivative	1.24	1.25333	1.00133	5.6136	0.026145	0.047473
RI2536.1, 15.3578 min, ZS-2_P	RI2536.1, 15.3578 min, ZS-2_P	0.977667	0.332667	1	5.549	0.026909	0.048605
RI1346.5, 5.6924 min, WR-2_P	RI1346.5, 5.6924 min, WR-2_P	1.126	0.568333	1.00117	5.5299	0.027141	0.048769
RI1336.2, 5.5837 min, WR-2_P	RI1336.2, 5.5837 min, WR-2_P	0.879	6.71667	1.00017	5.5134	0.027343	0.048877
RI1401.3, 6.2676 min, WR-2_NP	RI1401.3, 6.2676 min, WR-2_NP	0.797667	1.41333	0.999333	5.4564	0.028055	0.049891
1-Palmitoyllysophosphatidic acid	1-Palmitoyllysophosphatidic acid, 3O-TMS	1.32667	0.595333	1.00033	5.365	0.029243	0.051738
Decanedioic acid, dibutyl ester	Decanedioic acid, dibutyl ester	0.693333	0.957667	1.00117	5.3166	0.029898	0.052626
RI1772.9, 9.7660 min, WR-2_NP	RI1772.9, 9.7660 min, WR-2_NP	0.791667	1.074	1.0005	5.2981	0.030152	0.052805
RI2049.4, 12.0036 min, WR-2_P	RI2049.4, 12.0036 min, WR-2_P	0.977667	0.1226	1	5.2614	0.030665	0.053432
RI2215.9, 13.2330 min, ZSS-2_NP	RI2215.9, 13.2330 min, ZSS-2_NP	0.918	0.638667	0.999	5.1815	0.031821	0.055167
RI1481.0, 7.0517 min, WR-2_NP	RI1481.0, 7.0517 min, WR-2_NP	0.802333	1.03333	0.999167	5.1545	0.032224	0.055586
1-Tetradecene	1-Tetradecene	0.984667	1.18333	0.999333	5.1235	0.032694	0.056116
RI2494.0, 15.0908 min, WR-2_NP	RI2494.0, 15.0908 min, WR-2_NP	0.76	1.24667	1	5.0703	0.03352	0.057249
Glyceric acid	Glyceric acid, 3TMS	0.840667	0.738333	0.999667	4.952	0.035448	0.060244
RI1600.6, 8.2266 min, WR-2_P	RI1600.6, 8.2266 min, WR-2_P	0.602	0.385333	0.999333	4.7596	0.038886	0.065593
RI3148.8, 18.8136 min, ZSS-2_NP	RI3148.8, 18.8136 min, ZSS-2_NP	0.808	1.21333	1	4.7549	0.038976	0.065593
RI1415.7, 6.4095 min, WR-2_NP	RI1415.7, 6.4095 min, WR-2_NP	0.859	1.21	0.999167	4.6467	0.041093	0.068159
RI1541.8, 7.6489 min, WR-2_NP	RI1541.8, 7.6489 min, WR-2_NP	1.734	0.509667	1.00233	4.6573	0.040879	0.068159
Sulfuric acid	Sulfuric acid, 2TMS derivative	0.695	0.618333	0.999667	4.6551	0.040924	0.068159
RI1632.0, 8.5069 min, ZS-2_NP	RI1632.0, 8.5069 min, ZS-2_NP	2.70333	5.27333	0.9985	4.6125	0.041791	0.068656
RI2367.2, 14.2702 min, ZR-2_P	RI2367.2, 14.2702 min, ZR-2_P	0.980333	1.12333	0.9995	4.6143	0.041755	0.068656
RI2663.5, 16.1375 min, WR-2_NP	RI2663.5, 16.1375 min, WR-2_NP	1.44667	0.518	0.9995	4.57	0.04268	0.069784
Raffinose	Raffinose TMS	0.385333	1.69667	0.9995	4.5198	0.043759	0.071211
1-Eicosanol	1-Eicosanol, TMS derivative	0.3523	0.797667	1	4.4789	0.044663	0.072341
RI2455.2, 14.8452 min, WR-2_P	RI2455.2, 14.8452 min, WR-2_P	0.399333	0.35	1.0005	4.4406	0.045531	0.073402
4-Aminobutanoic acid	4-Aminobutanoic acid, 3TMS derivative	1.266	0.793	0.999333	4.3179	0.048451	0.077748
RI1384.2, 6.0883 min, ZS-2_NP	RI1384.2, 6.0883 min, ZS-2_NP	0.621	1.16767	1	4.2395	0.05044	0.080563
RI1656.8, 8.7287 min, WR-2_NP	RI1656.8, 8.7287 min, WR-2_NP	0.913667	1.30333	0.999333	4.1885	0.051785	0.082332
.beta.-D-Glucopyranose	.beta.-D-Glucopyranose, 5TMS derivative	0.708333	0.0612	1.001	4.1298	0.053389	0.084492
RI1490.0, 7.1393 min, ZR-2_P	RI1490.0, 7.1393 min, ZR-2_P	1.02867	0.780333	0.999667	4.0548	0.055529	0.087079
n/a	UK Sterol	0.845667	0.304667	1.00067	4.0576	0.055446	0.087079
RI1532.4, 7.5564 min, WR-2_NP	RI1532.4, 7.5564 min, WR-2_NP	0.79	1.58	0.999667	4.0359	0.056083	0.087551
RI3255.6, 19.3487 min, WS-2_P	RI3255.6, 19.3487 min, WS-2_P	1.05333	0.682333	0.999	3.9952	0.057302	0.08905
Octacosanoate	Trimethylsilyl octacosanoate	1.28667	1.05	0.9995	3.9852	0.057607	0.089123
n/a	Phosphoric acid, 1-trimethylsilyloxymethyl-1,2-ethanediyl tetrakistrimethylsilyl ester	1.39333	1.29667	0.999167	3.9372	0.059097	0.090709
RI1479.8, 7.0398 min, WR-2_NP	RI1479.8, 7.0398 min, WR-2_NP	0.9	1.12333	1.00033	3.9353	0.059158	0.090709
Sucrose	Sucrose, 8TMS derivative	1.16367	1.37667	0.999167	3.8165	0.063055	0.096256
RI2546.4, 15.4232 min, ZR-2_NP	RI2546.4, 15.4232 min, ZR-2_NP	1.17333	0.815	0.999833	3.7915	0.063917	0.097142
RI1535.1, 7.5826 min, ZS-2_NP	RI1535.1, 7.5826 min, ZS-2_NP	1.77	9.731	0.9985	3.7734	0.064546	0.097242
RI2901.5, 17.5027 min, WR-2_NP	RI2901.5, 17.5027 min, WR-2_NP	1.063	0.172633	0.998833	3.7802	0.064309	0.097242
RI2068.4, 12.1447 min, WS-2_P	RI2068.4, 12.1447 min, WS-2_P	0.538667	0.419667	0.999667	3.622	0.070142	0.10521
RI1945.9, 11.1958 min, ZSR-2_NP	RI1945.9, 11.1958 min, ZSR-2_NP	0.969667	0.02917	1.0005	3.4685	0.076429	0.11415
RI1367.0, 5.9074 min, WR-2_NP	RI1367.0, 5.9074 min, WR-2_NP	0.985	0.909333	0.9995	3.4536	0.077077	0.11462
L-Glutamine	L-Glutamine, 3TMS derivative	0.895333	0.855667	0.997833	3.4026	0.079341	0.11748
Cholesterol	Cholesterol, TMS derivative	1.33333	1.37	0.998667	3.2693	0.085652	0.12628
RI1250.4, 4.6807 min, WR-2_NP	RI1250.4, 4.6807 min, WR-2_NP	0.813667	0.856	0.999667	3.2388	0.087183	0.12799
RI2430.2, 14.6864 min, WR-2_P	RI2430.2, 14.6864 min, WR-2_P	0.85	1.23333	1.001	3.181	0.090172	0.13182
RI1310.1, 5.3093 min, ZSS-2_P	RI1310.1, 5.3093 min, ZSS-2_P	1.068	0.375	1.0005	3.1276	0.093051	0.13545
RI2617.4, 15.8656 min, ZSR-2_NP	RI2617.4, 15.8656 min, ZSR-2_NP	1.19667	0.695	1.00083	3.0973	0.094728	0.13732
RI1242.6, 4.5991 min, WR-2_NP	RI1242.6, 4.5991 min, WR-2_NP	1.22	1.13	0.999667	2.8993	0.10668	0.154
RI4597.1, 25.1519 min, ZSS-2_NP	RI4597.1, 25.1519 min, ZSS-2_NP	0.545667	1.38667	0.999833	2.8859	0.10756	0.15461
RI2485.0, 15.0339 min, WS-2_P	RI2485.0, 15.0339 min, WS-2_P	0.78	1.16333	1.0005	2.8738	0.10835	0.15511
RI2716.7, 16.4517 min, WR-2_P	RI2716.7, 16.4517 min, WR-2_P	0.803	0.420733	1.00167	2.8154	0.1123	0.1601
RI1440.3, 6.6516 min, WS-2_P	RI1440.3, 6.6516 min, WS-2_P	0.724667	0.394667	0.998833	2.7919	0.11394	0.16177
RI1519.4, 7.4289 min, WR-2_NP	RI1519.4, 7.4289 min, WR-2_NP	0.896	0.866	1.00017	2.7102	0.11986	0.16948
RI1555.1, 7.7798 min, WR-2_NP	RI1555.1, 7.7798 min, WR-2_NP	0.962333	1.11333	0.999333	2.6888	0.12148	0.17037
RI1796.8, 9.9791 min, WR-2_P	RI1796.8, 9.9791 min, WR-2_P	0.658333	0.998667	1.00183	2.6942	0.12107	0.17037
D-Ribofuranose	D---Ribofuranose, tetrakistrimethylsilyl ether isomer 2	1.103	3.01333	0.9995	2.657	0.12393	0.1731
RI3629.1, 21.0980 min, ZSS-2_NP	RI3629.1, 21.0980 min, ZSS-2_NP	1.50333	1.17033	0.999667	2.624	0.12653	0.17602
Alpha-ketoglutaric acid	Alpha-ketoglutaric acid meox2 2TMS	1.39	0.764667	0.999333	2.5702	0.13092	0.1814
RI1813.7, 10.1193 min, WR-2_P	RI1813.7, 10.1193 min, WR-2_P	0.876	0.409	1.00133	2.5085	0.13619	0.18794
RI1950.4, 11.2322 min, ZS-2_NP	RI1950.4, 11.2322 min, ZS-2_NP	0.354667	0.0325667	0.9985	2.4201	0.1442	0.1982
RI3923.2, 22.3551 min, WS-2_NP	RI3923.2, 22.3551 min, WS-2_NP	1.30033	1.93667	0.999833	2.4135	0.14482	0.19826
RI2399.2, 14.4893 min, ZS-2_NP	RI2399.2, 14.4893 min, ZS-2_NP	2.387	0.358	0.998667	2.4074	0.1454	0.19827
RI2112.9, 12.4760 min, WR-2_NP	RI2112.9, 12.4760 min, WR-2_NP	0.768667	1.23	0.999167	2.3934	0.14673	0.19929
1-Oleoyl Lysophosphaditic Acid	1-Oleoyl Lysophosphaditic Acid, 3O-TMS - Like	1.15833	0.763	0.999333	2.2879	0.15727	0.21195
RI3081.9, 18.4685 min, WR-2_P	RI3081.9, 18.4685 min, WR-2_P	0.918667	0.463	1.00017	2.2922	0.15682	0.21195
Pentacosanoic acid	Pentacosanoic acid, trimethylsilyl ester	1.74333	1.89267	0.9995	2.2737	0.15876	0.2123
Octanoic acid	Octanoic acid, trimethylsilyl ester	0.432	0.880333	1.00017	2.2289	0.16358	0.21789
RI3905.4, 22.2812 min, WR-2_NP	RI3905.4, 22.2812 min, WR-2_NP	0.930333	1.44333	0.999	2.2188	0.16468	0.21851
RI1196.8, 4.1174 min, WS-2_NP	RI1196.8, 4.1174 min, WS-2_NP	1.03033	1.362	1.0005	2.1554	0.17186	0.22718
RI1519.6, 7.4306 min, WR-2_P	RI1519.6, 7.4306 min, WR-2_P	0.805667	0.811667	1.00083	2.1043	0.17793	0.23252
RI1841.2, 10.3436 min, WR-2_NP	RI1841.2, 10.3436 min, WR-2_NP	0.555333	0.222	1.00083	2.1106	0.17717	0.23252
RI2760.5, 16.7102 min, ZS-2_P	RI2760.5, 16.7102 min, ZS-2_P	0.769333	0.934	1.00033	2.1082	0.17745	0.23252
RI2193.4, 13.0750 min, ZSS-2_NP	RI2193.4, 13.0750 min, ZSS-2_NP	1.03033	1.2	0.9985	2.0743	0.1816	0.23643
RI1332.7, 5.5472 min, WS-2_NP	RI1332.7, 5.5472 min, WS-2_NP	4.324	3.65	1.00033	2.0517	0.18445	0.23923
RI2958.3, 17.8161 min, WR-2_P	RI2958.3, 17.8161 min, WR-2_P	0.889	1.04033	1.00133	1.958	0.1968	0.25429
RI1191.3, 4.0596 min, WR-2_P	RI1191.3, 4.0596 min, WR-2_P	0.811	0.674	1	1.8967	0.20543	0.26445
RI3097.6, 18.5494 min, ZS-2_P	RI3097.6, 18.5494 min, ZS-2_P	0.556333	1.094	0.999167	1.8646	0.21012	0.26921
RI3222.6, 19.1881 min, WS-2_P	RI3222.6, 19.1881 min, WS-2_P	1.19	1.11467	1.00133	1.8609	0.21069	0.26921
RI1496.4, 7.2029 min, WR-2_P	RI1496.4, 7.2029 min, WR-2_P	1.76667	1.20333	0.998	1.8293	0.21545	0.27429
L-Phenylalanine	L-Phenylalanine, 2TMS derivative	1.19	1.18667	0.9995	1.685	0.23901	0.30315
Methyl-Phosphate	Phosphoric acid, bistrimethylsilylmonomethyl ester	0.848	0.601667	0.998833	1.6512	0.24498	0.30959
RI1470.0, 6.9430 min, WR-2_NP	RI1470.0, 6.9430 min, WR-2_NP	0.797	1.25333	0.999833	1.6269	0.24939	0.31401
Benzoic Acid	Benzoic Acid, TMS derivative	0.632	1.033	1.00133	1.5777	0.2586	0.32442
RI2192.5, 13.0681 min, WS-2_P	RI2192.5, 13.0681 min, WS-2_P	0.883667	1.19	0.999333	1.5296	0.26801	0.33502
RI1224.4, 4.4080 min, WR-2_NP	RI1224.4, 4.4080 min, WR-2_NP	0.836667	1.063	1.00017	1.5218	0.26957	0.33575
RI1351.4, 5.7434 min, ZS-2_NP	RI1351.4, 5.7434 min, ZS-2_NP	2.44867	0.899333	1.0015	1.4996	0.27409	0.33952
RI1521.3, 7.4476 min, WR-2_NP	RI1521.3, 7.4476 min, WR-2_NP	0.927333	1.04333	0.999	1.4973	0.27457	0.33952
RI1212.2, 4.2797 min, WR-2_NP	RI1212.2, 4.2797 min, WR-2_NP	0.992	1.09333	1.00067	1.4575	0.28292	0.3486
RI2159.4, 12.8217 min, WS-2_P	RI2159.4, 12.8217 min, WS-2_P	1.066	1.35667	1.00117	1.4224	0.29055	0.35673
RI1218.7, 4.3478 min, ZSS-2_NP	RI1218.7, 4.3478 min, ZSS-2_NP	1.04733	1.37567	0.999167	1.4085	0.29364	0.35924
RI2147.6, 12.7342 min, WR-2_NP	RI2147.6, 12.7342 min, WR-2_NP	1.17267	1.14967	0.999167	1.3734	0.30162	0.3677
RI2009.2, 11.7046 min, WR-2_NP	RI2009.2, 11.7046 min, WR-2_NP	0.964333	1.06	0.998833	1.3579	0.30522	0.37078
RI1992.4, 11.5738 min, WS-2_P	RI1992.4, 11.5738 min, WS-2_P	0.827333	0.828333	1.00017	1.3411	0.30919	0.37428
RI3308.8, 19.6079 min, ZSS-2_NP	RI3308.8, 19.6079 min, ZSS-2_NP	1.37	1.11833	0.999333	1.2662	0.32769	0.39529
Hexadecanoic acid, methyl ester	Hexadecanoic acid, methyl ester	1.20033	0.748333	1	1.2084	0.34289	0.41219
RI1492.9, 7.1681 min, WS-2_P	RI1492.9, 7.1681 min, WS-2_P	0.834667	0.720333	0.999167	1.155	0.35769	0.42848
RI2914.9, 17.5766 min, WS-2_P	RI2914.9, 17.5766 min, WS-2_P	0.783667	0.824667	1.0005	1.1369	0.3629	0.43322
RI1814.7, 10.1279 min, ZSR-2_NP	RI1814.7, 10.1279 min, ZSR-2_NP	0.732	0.913667	0.999167	1.1247	0.36645	0.43445
RI1502.7, 7.2650 min, ZSR-2_NP	RI1502.7, 7.2650 min, ZSR-2_NP	0.727	0.753	1.00133	1.1034	0.37275	0.43891
RI2364.7, 14.2532 min, WR-2_NP	RI2364.7, 14.2532 min, WR-2_NP	0.965	1.25	1	1.1038	0.37264	0.43891
RI1460.9, 6.8538 min, WR-2_NP	RI1460.9, 6.8538 min, WR-2_NP	1.21533	0.738333	0.999833	1.0974	0.37457	0.43954
RI2828.8, 17.1016 min, ZS-2_NP	RI2828.8, 17.1016 min, ZS-2_NP	1.12167	0.932667	0.9995	1.078	0.38046	0.44494
RI1161.6, 3.7470 min, WR-2_NP	RI1161.6, 3.7470 min, WR-2_NP	1.138	1.142	0.999833	1.0178	0.39948	0.46561
RI3017.7, 18.1374 min, ZS-2_P	RI3017.7, 18.1374 min, ZS-2_P	0.683	1.05533	0.999833	0.99236	0.40789	0.47381
Hexadecanenitrile	Hexadecanenitrile	0.946	1.11	0.999167	0.98399	0.4107	0.47525
RI2278.0, 13.6585 min, WS-2_P	RI2278.0, 13.6585 min, WS-2_P	0.504667	1.06167	0.9995	0.98047	0.41189	0.47525
RI1832.6, 10.2732 min, ZSR-2_NP	RI1832.6, 10.2732 min, ZSR-2_NP	0.396	0.373	0.999883	0.95026	0.42226	0.4856
RI3121.4, 18.6725 min, WS-2_P	RI3121.4, 18.6725 min, WS-2_P	0.851	0.693667	0.9985	0.93669	0.42702	0.48944
RI1626.6, 8.4586 min, WR-2_NP	RI1626.6, 8.4586 min, WR-2_NP	0.666	1.135	0.9995	0.88343	0.44637	0.50834
RI2634.3, 15.9651 min, ZSS-2_NP	RI2634.3, 15.9651 min, ZSS-2_NP	1.43233	1.16	0.999167	0.88318	0.44646	0.50834
RI2505.9, 15.1664 min, WR-2_NP	RI2505.9, 15.1664 min, WR-2_NP	0.831667	0.941667	0.998667	0.82719	0.46796	0.53108
RI2139.5, 12.6739 min, WS-2_P	RI2139.5, 12.6739 min, WS-2_P	1.07233	0.837	1.00067	0.77392	0.48961	0.55383
RI3139.0, 18.7634 min, WS-2_P	RI3139.0, 18.7634 min, WS-2_P	0.858	0.840667	0.9985	0.72798	0.50928	0.57419
RI1430.1, 6.5505 min, WR-2_NP	RI1430.1, 6.5505 min, WR-2_NP	0.992667	0.865	1.00033	0.71854	0.51343	0.57699
Oleic acid	Oleic acid, trimethylsilyl ester	0.556	0.532667	0.9995	0.70686	0.51864	0.58094
RI2636.0, 15.9752 min, WR-2_NP	RI2636.0, 15.9752 min, WR-2_NP	1.13467	1.027	1.00067	0.70116	0.5212	0.58193
Urea	1-Trimethylsilyl-3-trimethylsilyloxyurea	0.921	0.714333	1	0.65523	0.54242	0.60367
RI2763.8, 16.7296 min, WS-2_P	RI2763.8, 16.7296 min, WS-2_P	1.00333	0.399333	1.00033	0.60821	0.56526	0.62706
RI1593.5, 8.1570 min, WR-2_NP	RI1593.5, 8.1570 min, WR-2_NP	1.01367	0.769333	1	0.59414	0.57232	0.63285
RI1261.6, 4.7988 min, WR-2_NP	RI1261.6, 4.7988 min, WR-2_NP	0.828333	0.934667	1.00183	0.56487	0.58735	0.6474
RI2895.9, 17.4721 min, WR-2_NP	RI2895.9, 17.4721 min, WR-2_NP	0.723667	0.484667	0.999667	0.54539	0.59763	0.65663
RI3125.6, 18.6939 min, ZS-2_P	RI3125.6, 18.6939 min, ZS-2_P	0.874333	1.491	0.999	0.50989	0.61692	0.67568
RI3767.9, 21.7037 min, ZSS-2_NP	RI3767.9, 21.7037 min, ZSS-2_NP	1.12367	1.22667	1.00033	0.47829	0.63474	0.69299
Phytol	Phytol, TMS derivative	1.04667	0.962333	1.00117	0.46319	0.64348	0.70031
RI2807.7, 16.9852 min, ZS-2_NP	RI2807.7, 16.9852 min, ZS-2_NP	0.938333	1.09333	1.0005	0.45282	0.64956	0.70471
Lignoceric acid	Lignoceric acid, TMS derivative	1.00633	1.07	1.00033	0.43988	0.65725	0.71082
RI2878.8, 17.3777 min, ZS-2_NP	RI2878.8, 17.3777 min, ZS-2_NP	1.03267	1.06667	1.00033	0.40811	0.67661	0.72947
Stearic acid	Stearic acid, TMS derivative	0.975	0.966	0.999333	0.39749	0.68324	0.73433
RI2962.0, 17.8365 min, WR-2_NP	RI2962.0, 17.8365 min, WR-2_NP	0.764333	0.539333	1.00078	0.38935	0.68838	0.73755
RI2226.8, 13.3077 min, WR-2_NP	RI2226.8, 13.3077 min, WR-2_NP	1.16333	1.37167	1	0.36398	0.70469	0.75268
RI1635.8, 8.5409 min, WS-2_NP	RI1635.8, 8.5409 min, WS-2_NP	0.889667	0.777333	0.9985	0.35653	0.70956	0.75555
RI2192.0, 13.0648 min, ZSR-2_NP	RI2192.0, 13.0648 min, ZSR-2_NP	1.066	1.23067	1.00067	0.34798	0.71521	0.75922
RI1189.3, 4.0384 min, WR-2_P	RI1189.3, 4.0384 min, WR-2_P	0.747667	0.994667	1	0.33356	0.72486	0.76711
b-Alanine	b-Alanine, 3TMS derivative	0.827667	0.909	1.00033	0.31787	0.73555	0.77603
RI1307.6, 5.2830 min, WR-2_NP	RI1307.6, 5.2830 min, WR-2_NP	1.09333	1.02433	0.9985	0.2568	0.77901	0.81938
RI2290.5, 13.7444 min, ZSR-2_NP	RI2290.5, 13.7444 min, ZSR-2_NP	1.17333	0.994333	0.9995	0.21779	0.80841	0.84773
RI2162.7, 12.8464 min, WR-2_NP	RI2162.7, 12.8464 min, WR-2_NP	1.038	0.990333	1.00017	0.17781	0.83997	0.87815
RI2262.1, 13.5498 min, WR-2_NP	RI2262.1, 13.5498 min, WR-2_NP	1.01233	1.07767	0.999833	0.14918	0.8635	0.90002
1-Monopalmitin	1-Monopalmitin, 2TMS derivative	0.952333	0.981	0.999167	0.11855	0.88957	0.92163
RI2302.6, 13.8276 min, WS-2_P	RI2302.6, 13.8276 min, WS-2_P	0.961667	1.104	1.001	0.12034	0.88802	0.92163
n/a	2,3,4-Trihydroxybutyric acid tetrakistrimethylsilyl deriv., , R,R-	0.961333	0.920333	1.00017	0.099711	0.90608	0.93035
Nonanoic acid	Nonanoic acid, TMS derivative	0.955667	0.939333	0.998167	0.10041	0.90546	0.93035
RI2180.6, 12.9797 min, WR-2_NP	RI2180.6, 12.9797 min, WR-2_NP	0.940333	0.881667	1.0005	0.10231	0.90379	0.93035
n/a	1-Trimethylsilylmethyldimethylsilyloxyhexane	1.088	1.05333	0.999667	0.079961	0.9238	0.94573
RI2252.1, 13.4810 min, WR-2_NP	RI2252.1, 13.4810 min, WR-2_NP	0.973333	1.01233	0.999167	0.067077	0.93559	0.95496
RI1529.3, 7.5259 min, ZS-2_P	RI1529.3, 7.5259 min, ZS-2_P	1.14867	0.972667	0.999333	0.058811	0.94324	0.95994
Docosanoic acid	Docosanoic acid, TMS ester	1.02767	1.027	0.9995	0.045356	0.95587	0.96709
RI2485.8, 15.0390 min, ZS-2_NP	RI2485.8, 15.0390 min, ZS-2_NP	0.979	0.939667	1.00083	0.046536	0.95476	0.96709
1-Margaroleoyl Lysophosphatidic Acid	1-Margaroleoyl Lysophosphatidic Acid, 3O-TMS - Like	1.03233	1.04533	1.00183	0.036671	0.96414	0.97259
RI1511.0, 7.3457 min, WR-2_NP	RI1511.0, 7.3457 min, WR-2_NP	1.018	1.02533	0.999333	0.014352	0.98577	0.99152
Ethanimidic acid	Ethanimidic acid, N-trimethylsilyl-, trimethylsilyl ester	0.991	0.979333	1.00017	0.0028232	0.99718	0.99877
RI1436.6, 6.6151 min, WR-2_NP	RI1436.6, 6.6151 min, WR-2_NP	1.00967	1.008	0.9995	0.0012267	0.99877	0.99877
