# Supplementary material for: Maize Zmcyp710a8 Mutant as a Tool to Decipher the Function of Stigmasterol in Plant Metabolism
Source: Front Plant Sci. 2021 Nov 3;12:732216. doi: 10.3389/fpls.2021.732216 (PMC8597121; doi:10.3389/fpls.2021.732216)
Supplement: Supplementary file 3 [file Table_3.XLSX]

## Sheet: At-Root
Supplementary Data 3. Mean fold change of metabolites in Arabidopsis
		Mean fold change of metabolites in Arabidopsis root (Relative to Col-0)				ANOVA analysis
Common Name	Library Name	Atcyp710a1	L12	Col-0	L13	F statistic	p value	FDR
Sitosterol	Sitosterol, TMS derivative	1.6682	1.61365	1	0.156902	989.21	1.2843e-10	4.5759e-08
Stigmasterol	Stigmasterol, TMS derivative	0.0245011	0.100083	1	1.87137	904.66	1.834e-10	4.5759e-08
Stigmasteryl glucoside	Stigmasteryl glucoside	0.0024834	0.0350397	1	3.11813	475.75	2.3702e-09	3.9424e-07
Sitosteryl glucoside	Sitosteryl glucoside	1.50967	1.38289	1	0.115421	230.92	4.1611e-08	5.191e-06
RI=3436.2, 20.2433 min, CYP-2_NP	RI=3436.2, 20.2433 min, CYP-2_NP	2.72907	3.19265	1	0.239184	169.72	1.4004e-07	1.3976e-05
Cycloartenol	Cycloartenol Like, TMS	0.450492	0.426885	1	1.67148	101.53	1.0448e-06	8.6889e-05
RI=4582.8, 25.1255 min, CYP-2_NP	RI=4582.8, 25.1255 min, CYP-2_NP	0.822411	0.296926	1	9.36489	75.713	3.2522e-06	0.00023183
Brassicasterol	Brassicasterol, TMS	0.61049	0.931447	1	3.18278	63.085	6.549e-06	0.0004085
RI=3184.1, 19.0217 min, L12-2_NP	RI=3184.1, 19.0217 min, L12-2_NP	1.40492	1.02029	1	3.2157	59.521	8.1767e-06	0.00045335
RI=3313.5, 19.6562 min, CYP-2_NP	RI=3313.5, 19.6562 min, CYP-2_NP	2.16283	2.77962	1	0.249004	37.015	4.8822e-05	0.0024362
RI=3574.1, 20.8770 min, CYP-2_NP	RI=3574.1, 20.8770 min, CYP-2_NP	1.92326	2.22083	1	0.414866	33.882	6.7674e-05	0.0030699
RI=4063.9, 22.9669 min, CYP-2_NP	RI=4063.9, 22.9669 min, CYP-2_NP	1.50859	1.07451	1	1.34481	23.706	0.00024662	0.010255
RI=3616.1, 21.0664 min, CYP-2_NP	RI=3616.1, 21.0664 min, CYP-2_NP	2.47525	2.98845	1	0.1237	20.581	0.00040603	0.015585
RI=2412.5, 14.5982 min, WT-2_P	RI=2412.5, 14.5982 min, WT-2_P	0.426161	0.418499	1	0.423883	17.474	0.00071501	0.025485
RI=2382.9, 14.4019 min, CYP-2_P	RI=2382.9, 14.4019 min, CYP-2_P	0.952311	0.593412	1	1.51179	16.996	0.00078595	0.026146
RI=1853.8, 10.4702 min, CYP-2_NP	RI=1853.8, 10.4702 min, CYP-2_NP	1.82127	1.06684	1	1.09158	15.444	0.0010865	0.033884
L-Valine	L-Valine, 2TMS derivative	1.31543	1.15141	1	2.24042	13.825	0.0015697	0.046074
Ethanolamine	Ethanolamine, 3TMS derivative	0.993857	0.940897	1	1.4212	13.192	0.00183	0.048062
RI=3023.2, 18.1900 min, WT-2_P	RI=3023.2, 18.1900 min, WT-2_P	0.654212	0.637261	1	0.360521	13.308	0.0017785	0.048062
RI=2430.4, 14.7120 min, CYP-2_P	RI=2430.4, 14.7120 min, CYP-2_P	1.42443	0.830219	1	1.14174	12.778	0.0020299	0.050646
Isofucosterol	Isofucosterol, TMS	1.1024	1.42178	1	0.292845	12.263	0.0023185	0.055091
Myo-inositol	Myo-inositol	1.48436	1.04306	1	1.02515	10.855	0.0034158	0.076409
RI=2201.3, 13.1582 min, CYP-2_P	RI=2201.3, 13.1582 min, CYP-2_P	1.44858	1.36567	1	1.83164	10.75	0.0035218	0.076409
RI=2956.2, 17.8289 min, CYP-2_NP	RI=2956.2, 17.8289 min, CYP-2_NP	0.910861	0.756923	1	0.553002	10.219	0.0041227	0.085717
RI=1218.0, 4.3613 min, CYP-2_NP	RI=1218.0, 4.3613 min, CYP-2_NP	0.791645	1.42094	1	1.27393	9.9306	0.0045028	0.089876
n/a	2,2,8,8-Tetramethyl-3,7-dioxa-2,8-disilanonan-5-yl tetracosanoate	1.37037	0.991839	1	0.903327	8.7936	0.0065066	0.12281
Threonine	Threonine	1.10876	0.945189	1	1.24197	8.7317	0.006645	0.12281
Campesterol	Campesterol, TMS derivative	0.847933	0.840402	1	0.646506	8.265	0.0078156	0.13929
RI=2815.5, 17.0533 min, CYP-2_P	RI=2815.5, 17.0533 min, CYP-2_P	1.16198	1.2049	1	0.718269	7.9952	0.0086103	0.14816
RI=1618.0, 8.4059 min, CYP-2_P	RI=1618.0, 8.4059 min, CYP-2_P	0.485793	0.850312	1	0.418572	7.6733	0.0096956	0.16127
Fructose	Fructose	0.851052	0.998713	1	1.2414	7.2835	0.011248	0.17096
RI=1578.5, 8.0338 min, CYP-2_NP	RI=1578.5, 8.0338 min, CYP-2_NP	0.743349	1.04851	1	1.62598	7.1173	0.012004	0.17096
RI=1638.1, 8.5852 min, CYP-2_NP	RI=1638.1, 8.5852 min, CYP-2_NP	1.0612	0.889615	1	0.431588	7.2158	0.011549	0.17096
RI=3362.8, 19.8959 min, CYP-2_P	RI=3362.8, 19.8959 min, CYP-2_P	0.563745	0.513229	1	0.272629	7.0489	0.012334	0.17096
RI=3667.7, 21.2916 min, CYP-2_NP	RI=3667.7, 21.2916 min, CYP-2_NP	1.60318	1.15309	1	1.28943	7.2437	0.011424	0.17096
RI=3965.9, 22.5591 min, CYP-2_NP	RI=3965.9, 22.5591 min, CYP-2_NP	1.45875	1.21452	1	1.68977	7.1276	0.011956	0.17096
2-Aminoadipic acid	2-Aminoadipic acid, 3TMS derivative	0.45807	0.440665	1	0.325949	6.7646	0.01383	0.18181
3-Hydroxy-tyrosine	3-Hydroxy-tyrosine, 4TMS derivative	1.35382	1.21238	1	0.796599	6.6986	0.014209	0.18181
Aspartic acid	Aspartic acid	1.18207	1.01519	1	1.44741	6.7587	0.013864	0.18181
RI=1544.1, 7.6957 min, CYP-2_P	RI=1544.1, 7.6957 min, CYP-2_P	0.804485	1.00115	1	1.06843	6.5551	0.01508	0.18812
RI=2827.7, 17.1204 min, CYP-2_P	RI=2827.7, 17.1204 min, CYP-2_P	0.983465	1.0748	1	0.471654	6.2679	0.017031	0.20727
RI=2686.9, 16.3005 min, L12-2_NP	RI=2686.9, 16.3005 min, L12-2_NP	1.72766	1.41383	1	1.02447	6.1928	0.017591	0.209
n/a	1-Palmitoyloxy-3-trimethylsilyloxypropan-2-yl Z-hexadec-9-enoate - Like	1.58105	1.31534	1	1.46837	6.0033	0.019114	0.21251
RI=1743.4, 9.5264 min, CYP-2_NP	RI=1743.4, 9.5264 min, CYP-2_NP	1.47308	1.28484	1	1.1509	5.9478	0.01959	0.21251
RI=2996.5, 18.0506 min, CYP-2_NP	RI=2996.5, 18.0506 min, CYP-2_NP	1.61167	1.42914	1	0.896584	6.0173	0.018995	0.21251
RI=3866.6, 22.1462 min, CYP-2_NP	RI=3866.6, 22.1462 min, CYP-2_NP	1.28487	0.997612	1	1.32132	5.9685	0.019411	0.21251
Isoleucine	Isoleucine	0.970863	0.820788	1	1.38877	5.7254	0.021655	0.22991
Diethylene glycol	Diethylene glycol, 2TMS derivative	1.06987	0.911217	1	1.4389	5.6557	0.022357	0.23242
RI=1496.8, 7.2301 min, CYP-2_NP	RI=1496.8, 7.2301 min, CYP-2_NP	0.757868	1.19139	1	1.10212	5.4768	0.024294	0.2474
24-Methylenecycloartanol	9,19-Cyclolanostan-3-ol, 24-methylene-, 3a-, O-TMS	1.19591	1.16863	1	0.893613	5.3615	0.025654	0.25421
RI=1287.6, 5.0944 min, CYP-2_NP	RI=1287.6, 5.0944 min, CYP-2_NP	0.989673	0.884682	1	1.19793	5.3349	0.025981	0.25421
RI=3471.5, 20.4055 min, CYP-2_NP	RI=3471.5, 20.4055 min, CYP-2_NP	1.68719	1.19604	1	1.28866	5.0253	0.030197	0.28978
n/a	HC-Like3	1.01163	1.03541	1	1.31229	4.9697	0.031043	0.29227
RI=2404.8, 14.5498 min, CYP-2_P	RI=2404.8, 14.5498 min, CYP-2_P	0.529666	0.87055	1	0.608414	4.9255	0.031735	0.29325
Isophthalic acid	Isophthalic acid, 2TMS derivative	1.38668	1.19334	1	0.804703	4.7359	0.034937	0.31697
RI=2502.3, 15.1682 min, CYP-2_P	RI=2502.3, 15.1682 min, CYP-2_P	0.901065	1.01421	1	0.49518	4.6792	0.035971	0.32052
RI=3302.0, 19.6002 min, CYP-2_NP	RI=3302.0, 19.6002 min, CYP-2_NP	1.50657	1.08508	1	0.876672	4.6385	0.036735	0.3216
n/a	1-Cyclohexene-1-carboxylic acid, 3,4,5-tristrimethylsilyloxy-, trimethylsilyl ester, 3R-3.alpha.,4.alpha.,5.beta.-	0.853152	0.574153	1	1.28118	4.1427	0.047916	0.32695
Butyl caprylate	Butyl caprylate	1.03196	1.05945	1	1.37113	4.3424	0.042964	0.32695
Glucose	Glucose	0.981794	0.999861	1	1.27434	4.2686	0.044717	0.32695
Glyceric acid	Glyceric acid, 3TMS	1.06635	0.961338	1	1.36584	4.3992	0.041674	0.32695
Proline	Proline	0.865566	0.949059	1	1.80356	4.536	0.038757	0.32695
RI=1514.3, 7.4026 min, CYP-2_NP	RI=1514.3, 7.4026 min, CYP-2_NP	1.00518	1.06085	1	1.33608	4.5272	0.038936	0.32695
RI=1815.1, 10.1552 min, WT-2_NP	RI=1815.1, 10.1552 min, WT-2_NP	1.10748	0.894956	1	0.524949	4.2828	0.044373	0.32695
RI=1866.2, 10.5715 min, WT-2_P	RI=1866.2, 10.5715 min, WT-2_P	1.23614	1.16749	1	1.85054	4.1656	0.047314	0.32695
RI=2173.0, 12.9483 min, CYP-2_NP	RI=2173.0, 12.9483 min, CYP-2_NP	0.612848	0.523769	1	0.530621	4.2502	0.045167	0.32695
RI=2207.2, 13.1982 min, WT-2_P	RI=2207.2, 13.1982 min, WT-2_P	1.4982	1.06402	1	2.08851	4.2283	0.045712	0.32695
RI=2247.3, 13.4733 min, CYP-2_NP	RI=2247.3, 13.4733 min, CYP-2_NP	1.27969	1.0184	1	1.02987	4.4413	0.040747	0.32695
RI=2290.4, 13.7682 min, CYP-2_P	RI=2290.4, 13.7682 min, CYP-2_P	0.804926	0.827333	1	0.381681	4.1975	0.046489	0.32695
RI=2717.0, 16.4781 min, CYP-2_NP	RI=2717.0, 16.4781 min, CYP-2_NP	1.18585	0.950615	1	1.85038	4.164	0.047355	0.32695
RI=3418.4, 20.1617 min, CYP-2_NP	RI=3418.4, 20.1617 min, CYP-2_NP	2.6121	1.65575	1	1.11905	4.2678	0.044737	0.32695
RI=3874.6, 22.1793 min, CYP-2_NP	RI=3874.6, 22.1793 min, CYP-2_NP	1.4468	1.13269	1	1.18928	4.4014	0.041625	0.32695
trans-Sinapyl alcohol	trans-Sinapyl alcohol, 2O-TMS	0.837681	0.898551	1	0.6	4.1214	0.048485	0.32695
Tyrosine	Tyrosine	1.44671	1.29449	1	0.978185	4.4296	0.041002	0.32695
Pentadecanoic acid	Pentadecanoic acid, TMS derivative	0.844362	1.36626	1	0.963653	4.095	0.049202	0.32736
RI=3027.3, 18.2112 min, CYP-2_NP	RI=3027.3, 18.2112 min, CYP-2_NP	0.889675	0.639614	1	0.622407	4.0243	0.051189	0.3361
RI=1731.2, 9.4177 min, CYP-2_NP	RI=1731.2, 9.4177 min, CYP-2_NP	0.937759	0.722822	1	1.24896	3.9693	0.052801	0.34218
n/a	2,3,4-Trihydroxybutyric acid tetrakistrimethylsilyl deriv., , R*,R*-	1.06699	0.959521	1	0.815363	3.7396	0.060265	0.34986
n/a	Decanedioic acid, bis2-ethylhexyl ester - like	0.926152	1.10111	1	1.27426	3.7487	0.059947	0.34986
RI=1132.3, 3.4591 min, CYP-2_NP	RI=1132.3, 3.4591 min, CYP-2_NP	1.66858	1.26927	1	2.14428	3.8158	0.057654	0.34986
RI=1521.4, 7.4723 min, CYP-2_NP	RI=1521.4, 7.4723 min, CYP-2_NP	0.798913	1.22283	1	1.05707	3.7231	0.060851	0.34986
RI=1568.1, 7.9311 min, L12-2_NP	RI=1568.1, 7.9311 min, L12-2_NP	0.862543	1.23196	1	2.51546	3.7249	0.060789	0.34986
RI=1680.8, 8.9667 min, CYP-2_P	RI=1680.8, 8.9667 min, CYP-2_P	0.564792	0.978063	1	0.490831	3.8749	0.055724	0.34986
RI=1911.7, 10.9418 min, CYP-2_P	RI=1911.7, 10.9418 min, CYP-2_P	1.11638	1.07338	1	0.840096	3.7761	0.058996	0.34986
RI=2851.6, 17.2521 min, CYP-2_P	RI=2851.6, 17.2521 min, CYP-2_P	0.77661	0.825887	1	1.31866	3.7659	0.059347	0.34986
RI=2914.8, 17.6004 min, CYP-2_NP	RI=2914.8, 17.6004 min, CYP-2_NP	1.10088	1.12308	1	1.39384	3.719	0.060998	0.34986
RI=3783.3, 21.7963 min, WT-2_P	RI=3783.3, 21.7963 min, WT-2_P	0.994803	0.427459	1	0.410191	3.737	0.06036	0.34986
RI=1491.3, 7.1766 min, CYP-2_NP	RI=1491.3, 7.1766 min, CYP-2_NP	0.92035	1.34696	1	1.27731	3.6261	0.064438	0.36382
RI=2887.6, 17.4509 min, CYP-2_P	RI=2887.6, 17.4509 min, CYP-2_P	0.954526	1.07563	1	0.662079	3.6143	0.064889	0.36382
RI=4051.3, 22.9143 min, WT-2_P	RI=4051.3, 22.9143 min, WT-2_P	0.355183	1.3689	1	0.461814	3.5823	0.066143	0.36673
3-Amino-2-piperidone	3-Amino-2-piperidone, 2TMS derivative	0.941739	0.959837	1	1.42096	3.51	0.069078	0.37879
Nonanoic acid	Nonanoic acid, TMS derivative	0.847631	0.911012	1	1.21575	3.4668	0.070912	0.38462
n/a	Pentanedioic acid, 3-methyl-3-trimethylsilyloxy-, bistrimethylsilyl ester	1.4663	1.36877	1	0.457898	3.4403	0.072068	0.38652
RI=1191.4, 4.0809 min, CYP-2_P	RI=1191.4, 4.0809 min, CYP-2_P	0.97679	1.28058	1	1.2527	3.3805	0.074757	0.38652
RI=2663.5, 16.1629 min, L12-2_P	RI=2663.5, 16.1629 min, L12-2_P	2.60523	1.77814	1	1.40729	3.3983	0.073944	0.38652
RI=2727.5, 16.5402 min, CYP-2_P	RI=2727.5, 16.5402 min, CYP-2_P	0.721072	0.93179	1	0.676005	3.3723	0.075136	0.38652
RI=3018.8, 18.1670 min, CYP-2_NP	RI=3018.8, 18.1670 min, CYP-2_NP	1.43907	1.5818	1	1.58848	3.3986	0.073931	0.38652
RI=1171.5, 3.8719 min, CYP-2_NP	RI=1171.5, 3.8719 min, CYP-2_NP	0.770013	1.04384	1	0.817027	3.3555	0.075917	0.38656
RI=3339.9, 19.7845 min, CYP-2_NP	RI=3339.9, 19.7845 min, CYP-2_NP	0.815539	0.968421	1	1.25158	3.3304	0.077106	0.38865
Glutamic acid	Glutamic acid	1.12964	1.0192	1	1.27046	3.2497	0.081091	0.39286
RI=1341.6, 5.6635 min, L12-2_P	RI=1341.6, 5.6635 min, L12-2_P	1.29175	1.2082	1	0.977168	3.2589	0.080624	0.39286
RI=1691.4, 9.0617 min, CYP-2_NP	RI=1691.4, 9.0617 min, CYP-2_NP	0.853623	1.19565	1	1.18261	3.2739	0.079869	0.39286
RI=2496.1, 15.1290 min, L12-2_P	RI=2496.1, 15.1290 min, L12-2_P	1.10856	1.34447	1	0.613257	3.288	0.079168	0.39286
Palmitic Acid	Palmitic Acid, TMS derivative	0.752234	0.959622	1	1.07426	3.183	0.084571	0.3944
RI=1149.0, 3.6349 min, CYP-2_NP	RI=1149.0, 3.6349 min, CYP-2_NP	0.818268	1.15079	1	0.857833	3.2238	0.08242	0.3944
RI=2187.5, 13.0563 min, CYP-2_P	RI=2187.5, 13.0563 min, CYP-2_P	1.24876	0.827114	1	2.14925	3.197	0.083826	0.3944
RI=3227.6, 19.2382 min, CYP-2_NP	RI=3227.6, 19.2382 min, CYP-2_NP	1.38078	1.34935	1	0.961035	3.209	0.083195	0.3944
RI=2686.3, 16.2974 min, WT-2_NP	RI=2686.3, 16.2974 min, WT-2_NP	0.941682	0.920346	1	0.266839	3.1538	0.086155	0.39807
Levoglucosan	Levoglucosan, 3TMS derivative	0.449927	0.716334	1	0.797362	3.1279	0.087594	0.401
Serine	Serine	0.864535	0.963537	1	1.17024	3.1092	0.088646	0.40213
RI=1299.5, 5.2201 min, CYP-2_NP	RI=1299.5, 5.2201 min, CYP-2_NP	0.831456	1.07421	1	1.10473	2.9908	0.095704	0.40471
RI=1420.7, 6.4825 min, L12-2_P	RI=1420.7, 6.4825 min, L12-2_P	0.656877	0.804199	1	0.89021	3.0119	0.094391	0.40471
RI=1677.3, 8.9360 min, CYP-2_P	RI=1677.3, 8.9360 min, CYP-2_P	1.96096	1.02048	1	1.21229	3.0544	0.09183	0.40471
RI=1686.7, 9.0194 min, WT-2_P	RI=1686.7, 9.0194 min, WT-2_P	2.0623	1.24366	1	1.56266	3.0078	0.094648	0.40471
RI=1988.9, 11.5704 min, CYP-2_P	RI=1988.9, 11.5704 min, CYP-2_P	1.22733	1.53529	1	1.88824	3.0366	0.092894	0.40471
RI=2032.7, 11.9042 min, CYP-2_NP	RI=2032.7, 11.9042 min, CYP-2_NP	1.62297	0.9838	1	1.32253	3.0011	0.095057	0.40471
RI=2824.1, 17.1008 min, CYP-2_NP	RI=2824.1, 17.1008 min, CYP-2_NP	0.37587	0.683295	1	0.506468	3.0612	0.091425	0.40471
RI=3032.9, 18.2402 min, WT-2_P	RI=3032.9, 18.2402 min, WT-2_P	4.47413	0.811773	1	1.40695	3.0453	0.092368	0.40471
RI=2858.4, 17.2895 min, CYP-2_P	RI=2858.4, 17.2895 min, CYP-2_P	1.10551	1.41273	1	0.795064	2.9715	0.096913	0.40638
RI=2363.2, 14.2669 min, WT-2_P	RI=2363.2, 14.2669 min, WT-2_P	0.835897	0.77094	1	0.475556	2.9444	0.098653	0.40684
RI=2464.6, 14.9286 min, CYP-2_P	RI=2464.6, 14.9286 min, CYP-2_P	0.491755	0.730065	1	0.75375	2.9534	0.098071	0.40684
RI=1822.6, 10.2162 min, CYP-2_NP	RI=1822.6, 10.2162 min, CYP-2_NP	0.968187	0.660657	1	0.580064	2.8798	0.10295	0.4125
RI=2900.1, 17.5198 min, WT-2_P	RI=2900.1, 17.5198 min, WT-2_P	0.890764	0.800952	1	0.88887	2.8824	0.10278	0.4125
RI=3284.2, 19.5136 min, WT-2_P	RI=3284.2, 19.5136 min, WT-2_P	0.634872	0.899882	1	0.572277	2.8743	0.10333	0.4125
RI=1509.9, 7.3592 min, WT-2_NP	RI=1509.9, 7.3592 min, WT-2_NP	0.895307	1.27798	1	1.25993	2.8197	0.10716	0.42105
RI=2602.2, 15.8010 min, L12-2_P	RI=2602.2, 15.8010 min, L12-2_P	1.84942	1.42152	1	5.88314	2.8291	0.10649	0.42105
RI=1442.1, 6.6925 min, L12-2_NP	RI=1442.1, 6.6925 min, L12-2_NP	0.767339	1.07311	1	1.37253	2.7717	0.11068	0.43146
RI=1137.6, 3.5143 min, CYP-2_NP	RI=1137.6, 3.5143 min, CYP-2_NP	1.54025	1.30423	1	1.04638	2.7347	0.11348	0.43283
RI=1545.5, 7.7093 min, CYP-2_NP	RI=1545.5, 7.7093 min, CYP-2_NP	0.707766	1.12694	1	0.998337	2.7484	0.11244	0.43283
RI=1946.3, 11.2238 min, CYP-2_NP	RI=1946.3, 11.2238 min, CYP-2_NP	0.596667	0.66	1	0.894667	2.7306	0.1138	0.43283
RI=2486.8, 15.0696 min, CYP-2_NP	RI=2486.8, 15.0696 min, CYP-2_NP	1.60218	1.14073	1	1.31505	2.7217	0.1145	0.43283
Glutamine	Glutamine	1.85157	1.25883	1	1.74962	2.6908	0.11693	0.43543
RI=1473.2, 6.9984 min, WT-2_NP	RI=1473.2, 6.9984 min, WT-2_NP	0.881504	0.845697	1	0.710148	2.6925	0.1168	0.43543
RI=1428.1, 6.5556 min, CYP-2_NP	RI=1428.1, 6.5556 min, CYP-2_NP	1.05766	1.28939	1	1.26169	2.638	0.12125	0.44013
RI=2761.3, 16.7399 min, CYP-2_P	RI=2761.3, 16.7399 min, CYP-2_P	0.701113	0.915669	1	0.810879	2.6324	0.12172	0.44013
RI=3086.3, 18.5163 min, L12-2_NP	RI=3086.3, 18.5163 min, L12-2_NP	0.549772	0.746119	1	0.8	2.6462	0.12056	0.44013
RI=4161.9, 23.3746 min, CYP-2_NP	RI=4161.9, 23.3746 min, CYP-2_NP	1.71193	0.794495	1	1.01835	2.66	0.11942	0.44013
RI=2585.3, 15.6949 min, CYP-2_NP	RI=2585.3, 15.6949 min, CYP-2_NP	1.84635	1.17708	1	1.30469	2.6174	0.12298	0.4415
RI=1721.1, 9.3268 min, CYP-2_P	RI=1721.1, 9.3268 min, CYP-2_P	0.851258	0.993306	1	1.06824	2.6053	0.12402	0.44204
Urea	1-Trimethylsilyl-3-trimethylsilyloxyurea	1.16598	1.12726	1	1.45628	2.489	0.13452	0.44646
Asparagine	Asparagine	0.909006	0.864236	1	1.22349	2.5514	0.12876	0.44646
RI=1435.3, 6.6261 min, L12-2_NP	RI=1435.3, 6.6261 min, L12-2_NP	0.726658	1.13933	1	1.0878	2.5805	0.12617	0.44646
RI=1475.2, 7.0178 min, CYP-2_NP	RI=1475.2, 7.0178 min, CYP-2_NP	1.55929	1.5439	1	0.829045	2.4896	0.13447	0.44646
RI=1541.0, 7.6651 min, CYP-2_NP	RI=1541.0, 7.6651 min, CYP-2_NP	1.09573	1.07393	1	1.40226	2.4736	0.136	0.44646
RI=1622.9, 8.4493 min, WT-2_P	RI=1622.9, 8.4493 min, WT-2_P	0.789986	0.902015	1	0.814059	2.5282	0.13087	0.44646
RI=1899.6, 10.8432 min, CYP-2_P	RI=1899.6, 10.8432 min, CYP-2_P	0.935555	1.06815	1	1.23895	2.5015	0.13334	0.44646
RI=2007.6, 11.7174 min, CYP-2_NP	RI=2007.6, 11.7174 min, CYP-2_NP	0.694802	1.0654	1	0.995528	2.5364	0.13012	0.44646
RI=2167.3, 12.9058 min, CYP-2_NP	RI=2167.3, 12.9058 min, CYP-2_NP	1.61111	1.09425	1	1.76431	2.5158	0.13201	0.44646
RI=2225.8, 13.3254 min, L12-2_P	RI=2225.8, 13.3254 min, L12-2_P	1.059	1.08702	1	0.698525	2.5032	0.13318	0.44646
RI=3530.9, 20.6783 min, L12-2_NP	RI=3530.9, 20.6783 min, L12-2_NP	0.741534	1.03926	1	0.964417	2.4834	0.13506	0.44646
RI=3884.6, 22.2209 min, CYP-2_NP	RI=3884.6, 22.2209 min, CYP-2_NP	1.26069	0.959267	1	1.22403	2.4809	0.13529	0.44646
RI=2991.1, 18.0209 min, CYP-2_NP	RI=2991.1, 18.0209 min, CYP-2_NP	1.86508	0.547274	1	0.622843	2.4128	0.142	0.46313
RI=1661.6, 8.7950 min, CYP-2_P	RI=1661.6, 8.7950 min, CYP-2_P	1.06091	1.09851	1	1.38085	2.369	0.14653	0.47175
Sulfuric acid	Sulfuric acid, 2TMS derivative	1.40387	1.36521	1	0.507032	2.3265	0.1511	0.48334
RI=1783.8, 9.8875 min, CYP-2_P	RI=1783.8, 9.8875 min, CYP-2_P	0.825822	0.921926	1	1.32631	2.2961	0.15448	0.48787
RI=1172.4, 3.8815 min, WT-2_NP	RI=1172.4, 3.8815 min, WT-2_NP	1.06689	1.23595	1	1.19245	2.2727	0.15714	0.49001
RI=1478.9, 7.0543 min, CYP-2_NP	RI=1478.9, 7.0543 min, CYP-2_NP	0.820391	1.23104	1	1.17195	2.2559	0.15908	0.49001
RI=1724.7, 9.3591 min, CYP-2_NP	RI=1724.7, 9.3591 min, CYP-2_NP	1.8183	2.49723	1	0.940455	2.2676	0.15772	0.49001
RI=1757.2, 9.6496 min, CYP-2_P	RI=1757.2, 9.6496 min, CYP-2_P	0.854406	0.981953	1	1.12684	2.257	0.15895	0.49001
Lysine	Lysine	0.931956	0.849166	1	1.09247	2.2355	0.16148	0.49434
RI=1826.9, 10.2511 min, CYP-2_P	RI=1826.9, 10.2511 min, CYP-2_P	0.770199	0.864339	1	0.740482	2.2188	0.16348	0.4974
RI=1306.7, 5.2958 min, CYP-2_NP	RI=1306.7, 5.2958 min, CYP-2_NP	0.781614	1.12676	1	1.06311	2.1856	0.16754	0.50174
RI=2668.2, 16.1903 min, WT-2_NP	RI=2668.2, 16.1903 min, WT-2_NP	1.38137	1.25499	1	1.25055	2.1896	0.16704	0.50174
RI=2965.0, 17.8773 min, CYP-2_NP	RI=2965.0, 17.8773 min, CYP-2_NP	0.98282	0.986594	1	1.12745	2.1826	0.16792	0.50174
1-Eicosanol	1-Eicosanol, TMS derivative	0.797342	0.732558	1	0.739203	2.1168	0.17636	0.51388
n/a	3,5,5-Trimethylhexanoic acid trimethylsilyl ester	1.45684	1.20281	1	1.80367	2.0956	0.17919	0.51388
9,12-Octadecadienoic acid	9,12-Octadecadienoic acid Z,Z-, TMS - like 2	1.0483	1.33923	1	1.14403	2.138	0.17358	0.51388
RI=1413.7, 6.4137 min, CYP-2_NP	RI=1413.7, 6.4137 min, CYP-2_NP	1.42795	0.964789	1	3.61484	2.1163	0.17642	0.51388
RI=1461.0, 6.8785 min, CYP-2_P	RI=1461.0, 6.8785 min, CYP-2_P	1.6594	0.934564	1	1.3943	2.1338	0.17412	0.51388
RI=2362.9, 14.2651 min, CYP-2_NP	RI=2362.9, 14.2651 min, CYP-2_NP	1.62187	0.516799	1	0.925779	2.1082	0.1775	0.51388
RI=2773.3, 16.8103 min, CYP-2_P	RI=2773.3, 16.8103 min, CYP-2_P	0.447972	0.816574	1	0.382861	2.0969	0.17901	0.51388
D-Mannose, 6-phosphate	D-Mannose, 2,3,4,5-tetrakis-O-trimethylsilyl-, O-methyloxime, 6-bistrimethylsilyl phosphate	0.921253	1.49109	1	0.342994	2.086	0.18048	0.51463
RI=1675.5, 8.9199 min, CYP-2_NP	RI=1675.5, 8.9199 min, CYP-2_NP	1.1455	1.36028	1	1.35335	2.0731	0.18226	0.51674
RI=2212.8, 13.2364 min, CYP-2_P	RI=2212.8, 13.2364 min, CYP-2_P	0.491609	0.726694	1	0.355245	2.0647	0.18342	0.51709
RI=1788.4, 9.9283 min, CYP-2_NP	RI=1788.4, 9.9283 min, CYP-2_NP	0.786408	1.13269	1	1.21683	2.0507	0.18536	0.51963
Urea	Urea, 2TMS derivative	0.646098	0.71161	1	0.94534	2.0425	0.18652	0.51997
Oleic acid	Oleic acid, trimethylsilyl ester	0.841293	1.07005	1	1.11021	2.0257	0.18891	0.52371
RI=1911.5, 10.9400 min, CYP-2_NP	RI=1911.5, 10.9400 min, CYP-2_NP	0.666732	0.584729	1	0.499823	2.0065	0.1917	0.52851
RI=2179.7, 12.9976 min, CYP-2_NP	RI=2179.7, 12.9976 min, CYP-2_NP	0.86707	1.15138	1	1.3297	1.9891	0.19427	0.53008
RI=3956.3, 22.5191 min, CYP-2_NP	RI=3956.3, 22.5191 min, CYP-2_NP	1.28961	0.964259	1	0.962417	1.9883	0.1944	0.53008
RI=1147.2, 3.6154 min, CYP-2_NP	RI=1147.2, 3.6154 min, CYP-2_NP	0.838864	1.13892	1	1.09393	1.9356	0.20243	0.53863
RI=1529.5, 7.5521 min, CYP-2_P	RI=1529.5, 7.5521 min, CYP-2_P	1.3377	1.11647	1	1.11085	1.9278	0.20366	0.53863
RI=1555.9, 7.8113 min, WT-2_P	RI=1555.9, 7.8113 min, WT-2_P	0.681095	0.658663	1	0.508725	1.9281	0.2036	0.53863
RI=1799.9, 10.0311 min, CYP-2_P	RI=1799.9, 10.0311 min, CYP-2_P	0.985824	0.734402	1	0.685794	1.937	0.2022	0.53863
RI=3181.9, 19.0106 min, CYP-2_NP	RI=3181.9, 19.0106 min, CYP-2_NP	2.23799	0.985522	1	0.712722	1.9255	0.20401	0.53863
Tetradecanoic acid	Tetradecanoic acid, trimethylsilyl ester	0.793039	1.06461	1	1.01737	1.9508	0.20008	0.53863
RI=1219.8, 4.3808 min, CYP-2_NP	RI=1219.8, 4.3808 min, CYP-2_NP	1.17951	1.31066	1	2.31133	1.9153	0.20563	0.53903
RI=1554.4, 7.7968 min, CYP-2_NP	RI=1554.4, 7.7968 min, CYP-2_NP	0.920583	1.1329	1	1.07455	1.8973	0.20852	0.53903
RI=1573.9, 7.9888 min, CYP-2_NP	RI=1573.9, 7.9888 min, CYP-2_NP	0.831933	1.08613	1	0.939076	1.8916	0.20945	0.53903
RI=1752.4, 9.6063 min, CYP-2_NP	RI=1752.4, 9.6063 min, CYP-2_NP	0.584488	0.54109	1	0.78301	1.8843	0.21064	0.53903
RI=2349.8, 14.1751 min, CYP-2_P	RI=2349.8, 14.1751 min, CYP-2_P	24.4661	15.6322	1	37.3661	1.8863	0.21031	0.53903
RI=4074.1, 23.0093 min, CYP-2_NP	RI=4074.1, 23.0093 min, CYP-2_NP	0.964249	0.673491	1	0.983534	1.9012	0.2079	0.53903
RI=1416.6, 6.4417 min, L12-2_NP	RI=1416.6, 6.4417 min, L12-2_NP	0.93041	1.28313	1	1.53003	1.8709	0.21286	0.53916
RI=2325.2, 14.0068 min, CYP-2_NP	RI=2325.2, 14.0068 min, CYP-2_NP	2.22283	2.47303	1	1.86552	1.8768	0.21189	0.53916
1,2-Dipalmitin	1,2-Dipalmitin, TMS derivative - Like	1.2512	1.09118	1	1.08184	1.8189	0.22172	0.54372
RI=1197.3, 4.1438 min, CYP-2_P	RI=1197.3, 4.1438 min, CYP-2_P	1.22847	1.34974	1	0.855888	1.8224	0.22111	0.54372
RI=1756.1, 9.6394 min, CYP-2_NP	RI=1756.1, 9.6394 min, CYP-2_NP	0.517232	0.803679	1	0.711852	1.8444	0.21732	0.54372
RI=2097.8, 12.3885 min, CYP-2_NP	RI=2097.8, 12.3885 min, CYP-2_NP	2.14696	0.782088	1	1.04634	1.8486	0.21661	0.54372
RI=2332.6, 14.0571 min, L12-2_NP	RI=2332.6, 14.0571 min, L12-2_NP	0.569148	1.05495	1	0.942826	1.8265	0.2204	0.54372
RI=3045.9, 18.3072 min, CYP-2_NP	RI=3045.9, 18.3072 min, CYP-2_NP	1.52198	1.05706	1	0.738073	1.8157	0.22228	0.54372
RI=3625.5, 21.1072 min, CYP-2_NP	RI=3625.5, 21.1072 min, CYP-2_NP	1.49869	0.924731	1	0.941458	1.8389	0.21827	0.54372
RI=1385.9, 6.1301 min, L12-2_NP	RI=1385.9, 6.1301 min, L12-2_NP	0.979788	1.56497	1	1.79788	1.7882	0.22715	0.55135
RI=1715.1, 9.2733 min, CYP-2_P	RI=1715.1, 9.2733 min, CYP-2_P	1.78029	0.996749	1	1.74629	1.7857	0.22761	0.55135
Hexadecanoic acid	Hexadecanoic acid, trimethylsilyl ester	1.35528	1.01103	1	1.3376	1.7486	0.23441	0.56508
RI=1445.3, 6.7247 min, CYP-2_NP	RI=1445.3, 6.7247 min, CYP-2_NP	1.61368	1.11795	1	0.984615	1.7317	0.2376	0.56728
RI=2020.8, 11.8160 min, WT-2_P	RI=2020.8, 11.8160 min, WT-2_P	1.15356	0.851983	1	1.92298	1.7372	0.23655	0.56728
RI=1395.5, 6.2320 min, CYP-2_NP	RI=1395.5, 6.2320 min, CYP-2_NP	0.790223	1.12959	1	1.10645	1.7117	0.24142	0.57365
RI=1655.7, 8.7423 min, CYP-2_NP	RI=1655.7, 8.7423 min, CYP-2_NP	0.972603	1.27169	1	1.19178	1.6936	0.24496	0.57931
Campesteryl glucoside	Campesteryl glucoside	0.921422	0.703735	1	0.795392	1.6664	0.25038	0.58565
RI=1705.6, 9.1883 min, CYP-2_NP	RI=1705.6, 9.1883 min, CYP-2_NP	0.877489	0.888208	1	0.5	1.6625	0.25116	0.58565
RI=3260.6, 19.3990 min, WT-2_NP	RI=3260.6, 19.3990 min, WT-2_NP	1.79645	1.29037	1	0.736544	1.6632	0.25102	0.58565
RI=2029.5, 11.8806 min, WT-2_P	RI=2029.5, 11.8806 min, WT-2_P	1.4612	1.20117	1	1.28128	1.653	0.25311	0.58744
n/a	Carbamic acid,trimethylsilyltrimethylsilyloxy trimethylsilyl ester	0.880096	1.12572	1	1.15465	1.6078	0.26256	0.58882
Raffinose	Raffinose TMS	0.917536	1.05712	1	0.798473	1.6112	0.26184	0.58882
RI=1623.6, 8.4560 min, CYP-2_NP	RI=1623.6, 8.4560 min, CYP-2_NP	0.977922	0.888003	1	0.676641	1.6162	0.26077	0.58882
RI=1699.9, 9.1373 min, CYP-2_NP	RI=1699.9, 9.1373 min, CYP-2_NP	1.36745	1.57131	1	1.6531	1.6029	0.26362	0.58882
RI=1866.9, 10.5773 min, CYP-2_NP	RI=1866.9, 10.5773 min, CYP-2_NP	1.51515	1.42332	1	1.31701	1.6321	0.25742	0.58882
RI=1998.9, 11.6519 min, CYP-2_NP	RI=1998.9, 11.6519 min, CYP-2_NP	0.877619	1.06541	1	0.904446	1.6097	0.26217	0.58882
RI=2108.6, 12.4693 min, CYP-2_P	RI=2108.6, 12.4693 min, CYP-2_P	0.553284	0.79269	1	0.922005	1.6331	0.25722	0.58882
RI=2716.4, 16.4748 min, L12-2_NP	RI=2716.4, 16.4748 min, L12-2_NP	0.779824	1.07147	1	0.969546	1.6001	0.26422	0.58882
RI=3487.9, 20.4811 min, CYP-2_NP	RI=3487.9, 20.4811 min, CYP-2_NP	1.56556	1.23079	1	1.14141	1.5996	0.26432	0.58882
RI=1400.4, 6.2829 min, CYP-2_NP	RI=1400.4, 6.2829 min, CYP-2_NP	0.730427	1.15158	1	1.22929	1.5865	0.26717	0.5899
RI=3126.1, 18.7217 min, CYP-2_NP	RI=3126.1, 18.7217 min, CYP-2_NP	1.9821	1.07725	1	1.19736	1.5874	0.26696	0.5899
Niacin	Niacin, TMS derivative	0.932062	0.983909	1	0.700238	1.5683	0.27119	0.59497
RI=1395.7, 6.2336 min, CYP-2_NP	RI=1395.7, 6.2336 min, CYP-2_NP	0.738005	1.131	1	1.20716	1.5653	0.27185	0.59497
RI=2172.5, 12.9441 min, CYP-2_P	RI=2172.5, 12.9441 min, CYP-2_P	0.753217	0.811645	1	0.532205	1.5538	0.27442	0.59797
RI=1181.8, 3.9807 min, CYP-2_NP	RI=1181.8, 3.9807 min, CYP-2_NP	0.485992	0.866831	1	0.875034	1.5449	0.27645	0.59978
RI=2734.6, 16.5819 min, WT-2_NP	RI=2734.6, 16.5819 min, WT-2_NP	0.839714	1.36922	1	1.34005	1.5215	0.28183	0.6088
RI=1155.2, 3.7004 min, CYP-2_NP	RI=1155.2, 3.7004 min, CYP-2_NP	0.919441	1.19308	1	1.21505	1.513	0.28382	0.61045
1-Linolenoylglycerol	1-Linolenoylglycerol, 2TMS derivative	1.25975	0.916367	1	0.987552	1.4413	0.30126	0.61293
Eicosanoic acid	Eicosanoic acid, trimethylsilyl ester	0.85108	1.02018	1	0.861023	1.4943	0.28825	0.61293
RI=1202.2, 4.1948 min, CYP-2_NP	RI=1202.2, 4.1948 min, CYP-2_NP	0.5841	0.698466	1	0.86781	1.4368	0.30241	0.61293
RI=1324.6, 5.4851 min, L12-2_P	RI=1324.6, 5.4851 min, L12-2_P	1.33522	1.34379	1	0.801709	1.457	0.29733	0.61293
RI=1480.1, 7.0662 min, CYP-2_NP	RI=1480.1, 7.0662 min, CYP-2_NP	0.867853	1.10194	1	1.05556	1.454	0.29807	0.61293
RI=1483.5, 7.1002 min, CYP-2_NP	RI=1483.5, 7.1002 min, CYP-2_NP	0.852224	1.20698	1	1.1183	1.4787	0.292	0.61293
RI=1766.2, 9.7303 min, CYP-2_NP	RI=1766.2, 9.7303 min, CYP-2_NP	1.39574	1.14043	1	1.29483	1.4361	0.30258	0.61293
RI=1915.5, 10.9731 min, L12-2_P	RI=1915.5, 10.9731 min, L12-2_P	1.34915	1.12507	1	1.53407	1.4748	0.29296	0.61293
RI=2130.2, 12.6298 min, CYP-2_P	RI=2130.2, 12.6298 min, CYP-2_P	0.924028	1.01366	1	0.791408	1.4281	0.30462	0.61293
RI=2140.6, 12.7071 min, CYP-2_NP	RI=2140.6, 12.7071 min, CYP-2_NP	0.535372	0.671463	1	0.782374	1.4639	0.29563	0.61293
RI=2514.6, 15.2463 min, CYP-2_NP	RI=2514.6, 15.2463 min, CYP-2_NP	0.816412	1.12656	1	1.26565	1.4297	0.30421	0.61293
RI=2573.7, 15.6210 min, CYP-2_P	RI=2573.7, 15.6210 min, CYP-2_P	0.879373	0.924316	1	0.750575	1.469	0.29437	0.61293
RI=2764.3, 16.7576 min, CYP-2_NP	RI=2764.3, 16.7576 min, CYP-2_NP	1.25892	0.916367	1	0.984232	1.4372	0.30229	0.61293
RI=2841.1, 17.1943 min, CYP-2_P	RI=2841.1, 17.1943 min, CYP-2_P	0.96816	0.906362	1	1.02717	1.4312	0.30382	0.61293
RI=2884.9, 17.4356 min, CYP-2_NP	RI=2884.9, 17.4356 min, CYP-2_NP	0.91866	1.15885	1	0.994179	1.4919	0.28883	0.61293
1-Palmitoyllysophosphatidic acid	1-Palmitoyllysophosphatidic acid, 3O-TMS	1.16238	0.772666	1	0.840325	1.4093	0.30946	0.61523
RI=1191.6, 4.0835 min, CYP-2_NP	RI=1191.6, 4.0835 min, CYP-2_NP	0.66133	1.08251	1	1.15394	1.4109	0.30905	0.61523
RI=2931.4, 17.6920 min, L12-2_P	RI=2931.4, 17.6920 min, L12-2_P	2.40593	1.18255	1	1.53905	1.4161	0.30769	0.61523
D-Gluconic acid	D-Gluconic acid, 6TMS derivative	1.10883	0.92983	1	0.994225	1.3825	0.31652	0.62183
RI=1324.6, 5.4843 min, CYP-2_NP	RI=1324.6, 5.4843 min, CYP-2_NP	1.34006	0.855786	1	1.10148	1.3828	0.31644	0.62183
RI=1670.5, 8.8748 min, CYP-2_NP	RI=1670.5, 8.8748 min, CYP-2_NP	0.831622	1.05749	1	0.882957	1.383	0.31639	0.62183
RI=1383.6, 6.1062 min, CYP-2_NP	RI=1383.6, 6.1062 min, CYP-2_NP	1.03099	0.756818	1	0.593388	1.3598	0.32267	0.63125
RI=2811.2, 17.0295 min, CYP-2_NP	RI=2811.2, 17.0295 min, CYP-2_NP	0.1598	1.51209	1	0.872332	1.3555	0.32385	0.63125
RI=3000.9, 18.0744 min, CYP-2_NP	RI=3000.9, 18.0744 min, CYP-2_NP	0.827801	1.16915	1	1.14525	1.3466	0.32629	0.63354
RI=2166.6, 12.9009 min, L12-2_NP	RI=2166.6, 12.9009 min, L12-2_NP	0.744979	0.992402	1	1.55501	1.3273	0.3317	0.63417
RI=2261.9, 13.5727 min, CYP-2_NP	RI=2261.9, 13.5727 min, CYP-2_NP	0.66817	0.993688	1	0.967538	1.3394	0.32829	0.63417
RI=3077.9, 18.4729 min, CYP-2_P	RI=3077.9, 18.4729 min, CYP-2_P	1.13308	1.05662	1	1.06549	1.33	0.33093	0.63417
RI=3846.2, 22.0613 min, CYP-2_P	RI=3846.2, 22.0613 min, CYP-2_P	0.729394	0.767984	1	0.55232	1.3361	0.3292	0.63417
RI=1515.9, 7.4187 min, CYP-2_NP	RI=1515.9, 7.4187 min, CYP-2_NP	0.824266	1.09341	1	1.0862	1.3156	0.335	0.63702
Stearic acid, TMS derivative	Stearic acid, TMS derivative	0.787662	0.897595	1	0.996649	1.313	0.33575	0.63702
RI=1335.9, 5.6041 min, CYP-2_NP	RI=1335.9, 5.6041 min, CYP-2_NP	0.794423	1.45939	1	1.26603	1.3034	0.33851	0.63922
Tris2,4-di-tert-butylphenyl phosphate	Tris2,4-di-tert-butylphenyl phosphate	0.734714	1.33692	1	1.03653	1.3001	0.33947	0.63922
RI=1665.9, 8.8341 min, CYP-2_P	RI=1665.9, 8.8341 min, CYP-2_P	1.06091	0.818528	1	0.647208	1.2852	0.34384	0.64261
RI=2854.8, 17.2699 min, CYP-2_NP	RI=2854.8, 17.2699 min, CYP-2_NP	1.45693	0.915901	1	1.28362	1.2886	0.34282	0.64261
D-Ribofuranose	D---Ribofuranose, tetrakistrimethylsilyl ether isomer 2	0.894826	0.816013	1	0.783576	1.2806	0.34519	0.64272
1-Octadecanol	1-Octadecanol, TMS derivative	0.966761	0.856901	1	1.20338	1.1824	0.37571	0.64902
b-Alanine	b-Alanine, 3TMS derivative	0.85571	0.980996	1	1.08145	1.2047	0.36851	0.64902
RI=1218.4, 4.3655 min, CYP-2_NP	RI=1218.4, 4.3655 min, CYP-2_NP	0.945394	1.01933	1	1.30465	1.1851	0.37483	0.64902
RI=1293.1, 5.1530 min, CYP-2_NP	RI=1293.1, 5.1530 min, CYP-2_NP	0.586123	1.41525	1	1.535	1.1994	0.37021	0.64902
RI=1381.2, 6.0809 min, WT-2_NP	RI=1381.2, 6.0809 min, WT-2_NP	1.05116	1.3831	1	1.43729	1.219	0.36398	0.64902
RI=1594.1, 8.1867 min, CYP-2_NP	RI=1594.1, 8.1867 min, CYP-2_NP	0.855278	1.14099	1	1.02424	1.231	0.36024	0.64902
RI=1626.6, 8.4823 min, CYP-2_NP	RI=1626.6, 8.4823 min, CYP-2_NP	1.43064	1.45078	1	1.19685	1.235	0.35899	0.64902
RI=1794.9, 9.9860 min, CYP-2_P	RI=1794.9, 9.9860 min, CYP-2_P	0.895243	0.821765	1	0.825226	1.2525	0.3536	0.64902
RI=1985.0, 11.5390 min, CYP-2_P	RI=1985.0, 11.5390 min, CYP-2_P	0.45227	1.07909	1	1.09263	1.2145	0.3654	0.64902
RI=2289.5, 13.7622 min, CYP-2_NP	RI=2289.5, 13.7622 min, CYP-2_NP	0.970874	1.52913	1	1.37288	1.26	0.35136	0.64902
RI=2355.6, 14.2150 min, CYP-2_NP	RI=2355.6, 14.2150 min, CYP-2_NP	0.696133	0.76105	1	0.911909	1.1821	0.37582	0.64902
RI=2387.5, 14.4333 min, CYP-2_NP	RI=2387.5, 14.4333 min, CYP-2_NP	0.947891	1.09429	1	1.04715	1.1864	0.37441	0.64902
RI=2591.2, 15.7322 min, CYP-2_NP	RI=2591.2, 15.7322 min, CYP-2_NP	1.06084	0.844487	1	0.66749	1.2501	0.35434	0.64902
RI=2824.9, 17.1051 min, CYP-2_NP	RI=2824.9, 17.1051 min, CYP-2_NP	0.659902	0.971772	1	0.932642	1.2226	0.36284	0.64902
RI=2949.8, 17.7932 min, CYP-2_NP	RI=2949.8, 17.7932 min, CYP-2_NP	1.1027	0.956354	1	1.12452	1.2325	0.35975	0.64902
RI=3045.9, 18.3073 min, WT-2_P	RI=3045.9, 18.3073 min, WT-2_P	1.35609	1.32002	1	0.553846	1.2191	0.36395	0.64902
RI=3389.0, 20.0233 min, CYP-2_P	RI=3389.0, 20.0233 min, CYP-2_P	1.05278	0.957071	1	0.582323	1.2083	0.36738	0.64902
RI=4233.4, 23.6720 min, CYP-2_P	RI=4233.4, 23.6720 min, CYP-2_P	0.600827	0.843179	1	0.28846	1.2126	0.36599	0.64902
RI=4243.8, 23.7153 min, CYP-2_NP	RI=4243.8, 23.7153 min, CYP-2_NP	0.814637	0.973862	1	1.38532	1.2287	0.36095	0.64902
RI=4259.7, 23.7815 min, CYP-2_NP	RI=4259.7, 23.7815 min, CYP-2_NP	1.1408	1.87176	1	0.830718	1.2512	0.35402	0.64902
Scopolin	Scopolin, tetratrimethylsilyl-	1.39709	1.19738	1	1.10056	1.1819	0.37589	0.64902
Heptadecanoic acid	Heptadecanoic acid, TMS Like	0.32958	0.698949	1	1.01727	1.1636	0.38191	0.6534
RI=1978.2, 11.4838 min, CYP-2_P	RI=1978.2, 11.4838 min, CYP-2_P	0.539008	0.76358	1	0.654935	1.1623	0.38235	0.6534
RI=2430.4, 14.7119 min, CYP-2_NP	RI=2430.4, 14.7119 min, CYP-2_NP	0.950106	1.37049	1	1.09236	1.1649	0.38148	0.6534
RI=2091.3, 12.3401 min, CYP-2_NP	RI=2091.3, 12.3401 min, CYP-2_NP	1.39294	1.04834	1	1.21854	1.1455	0.38801	0.65412
RI=2241.0, 13.4301 min, CYP-2_P	RI=2241.0, 13.4301 min, CYP-2_P	1.60239	0.99101	1	1.77576	1.1525	0.38563	0.65412
RI=3523.1, 20.6425 min, CYP-2_NP	RI=3523.1, 20.6425 min, CYP-2_NP	0.942867	2.35912	1	1.01537	1.1492	0.38675	0.65412
Phosphate	Silanol, trimethyl-, phosphate 3:1	1.10998	1.10082	1	1.06618	1.1565	0.38431	0.65412
Sinapinic acid	Sinapinic acid, 2TMS derivative	0.754124	1.10605	1	0.748625	1.1292	0.39356	0.66124
RI=1796.9, 10.0039 min, CYP-2_P	RI=1796.9, 10.0039 min, CYP-2_P	0.804795	1.02194	1	0.983123	1.1102	0.40016	0.66567
RI=2046.5, 12.0070 min, CYP-2_NP	RI=2046.5, 12.0070 min, CYP-2_NP	0.310231	1.4485	1	1.16975	1.1101	0.4002	0.66567
RI=3094.0, 18.5561 min, CYP-2_NP	RI=3094.0, 18.5561 min, CYP-2_NP	0.997268	0.88388	1	0.882514	1.114	0.39885	0.66567
RI=1194.7, 4.1158 min, CYP-2_NP	RI=1194.7, 4.1158 min, CYP-2_NP	0.631789	0.753713	1	0.695855	1.1013	0.40333	0.66864
RI=1243.8, 4.6331 min, CYP-2_NP	RI=1243.8, 4.6331 min, CYP-2_NP	0.907696	1.23938	1	1.41347	1.0877	0.40819	0.67311
RI=2143.9, 12.7317 min, CYP-2_NP	RI=2143.9, 12.7317 min, CYP-2_NP	0.885227	1.12216	1	1.05483	1.0824	0.41007	0.67311
Sucrose	Sucrose, 8TMS derivative	0.914914	1.01129	1	0.683646	1.084	0.40949	0.67311
Maltose	Maltose, 8TMS derivative , isomer 1	0.916586	0.897654	1	0.661796	1.0746	0.41289	0.67552
e-hydroxy fatty acid	e-hydroxy fatty acid, C22, bis-TMS derivative	1.13345	1.39008	1	1.26347	1.0596	0.41842	0.67788
RI=1177.4, 3.9340 min, CYP-2_NP	RI=1177.4, 3.9340 min, CYP-2_NP	1.112	1.47148	1	1.68182	1.0549	0.42014	0.67788
RI=1563.7, 7.8877 min, CYP-2_NP	RI=1563.7, 7.8877 min, CYP-2_NP	0.785612	1.12086	1	1.07914	1.0486	0.42248	0.67788
RI=1918.7, 10.9987 min, CYP-2_P	RI=1918.7, 10.9987 min, CYP-2_P	0.886377	1.43302	1	1.16232	1.061	0.41789	0.67788
RI=2145.3, 12.7419 min, CYP-2_P	RI=2145.3, 12.7419 min, CYP-2_P	0.770677	1.01629	1	0.610276	1.0513	0.42147	0.67788
RI=2702.6, 16.3932 min, CYP-2_NP	RI=2702.6, 16.3932 min, CYP-2_NP	0.864244	0.912062	1	1.05599	1.0667	0.41579	0.67788
.beta.-D-Glucopyranose	.beta.-D-Glucopyranose, 5TMS derivative	0.0750098	0.127136	1	0.0946249	1.04	0.42573	0.68089
RI=1580.3, 8.0517 min, CYP-2_P	RI=1580.3, 8.0517 min, CYP-2_P	0.745956	0.669263	1	1.08928	1.0185	0.43389	0.68953
RI=2503.4, 15.1750 min, CYP-2_NP	RI=2503.4, 15.1750 min, CYP-2_NP	0.892655	1.04387	1	1.23799	1.0219	0.43261	0.68953
RI=1454.0, 6.8097 min, L12-2_NP	RI=1454.0, 6.8097 min, L12-2_NP	1.02541	1.71239	1	0.926076	1.0044	0.43936	0.69339
RI=2037.3, 11.9383 min, CYP-2_P	RI=2037.3, 11.9383 min, CYP-2_P	1.429	1.24963	1	2.51722	1.0038	0.43962	0.69339
RI=3673.0, 21.3145 min, CYP-2_NP	RI=3673.0, 21.3145 min, CYP-2_NP	0.721551	1.2012	1	1.49562	0.99447	0.44327	0.69339
Triethylene glycol	Triethylene glycol, 2TMS derivative	0.785442	1.11553	1	0.993187	1.0005	0.44089	0.69339
Tromethamine	Tromethamine, 4TMS derivative	0.96812	0.774597	1	54.6682	0.99735	0.44214	0.69339
n/a	4-bistrimethylsilylamino-4-keto-2-trimethylsilylaminobutyric acid trimethylsilyl ester	1.47093	1.5898	1	0.869259	0.98885	0.4455	0.6947
RI=1189.3, 4.0588 min, CYP-2_NP	RI=1189.3, 4.0588 min, CYP-2_NP	0.724648	0.855662	1	1.09104	0.96671	0.45438	0.70634
RI=3974.1, 22.5930 min, CYP-2_NP	RI=3974.1, 22.5930 min, CYP-2_NP	1.77995	1.46478	1	1.39231	0.95688	0.45838	0.71035
Glycerol	Glycerol, 3TMS derivative	0.895996	0.897944	1	1.1036	0.95009	0.46117	0.71114
RI=1200.1, 4.1727 min, CYP-2_NP	RI=1200.1, 4.1727 min, CYP-2_NP	0.859425	1.25559	1	0.990415	0.94692	0.46248	0.71114
RI=4525.6, 24.8877 min, CYP-2_P	RI=4525.6, 24.8877 min, CYP-2_P	0.738438	1.06306	1	0.616875	0.94526	0.46317	0.71114
Decanoic acid	Decanoic acid, trimethylsilyl ester	0.430237	0.696126	1	0.603046	0.93838	0.46603	0.71115
RI=1130.3, 3.4378 min, CYP-2_NP	RI=1130.3, 3.4378 min, CYP-2_NP	0.808642	1.00069	1	0.904664	0.94033	0.46521	0.71115
RI=3503.3, 20.5516 min, CYP-2_NP	RI=3503.3, 20.5516 min, CYP-2_NP	1.30406	1.20379	1	0.873652	0.93029	0.46942	0.71414
Dodecanoic acid	Dodecanoic acid, trimethylsilyl ester	0.902079	1.0995	1	1.14798	0.91514	0.47583	0.71424
RI=1441.0, 6.6823 min, CYP-2_P	RI=1441.0, 6.6823 min, CYP-2_P	1.21735	1.21725	1	1.64111	0.91326	0.47664	0.71424
RI=2633.5, 15.9855 min, WT-2_P	RI=2633.5, 15.9855 min, WT-2_P	0.868485	1.10824	1	0.571515	0.91528	0.47577	0.71424
RI=3007.3, 18.1076 min, CYP-2_P	RI=3007.3, 18.1076 min, CYP-2_P	2.08815	1.44805	1	0.711276	0.92368	0.4722	0.71424
RI=3277.0, 19.4787 min, CYP-2_NP	RI=3277.0, 19.4787 min, CYP-2_NP	1.46252	1.17801	1	1.00444	0.92026	0.47365	0.71424
RI=1796.8, 10.0030 min, CYP-2_NP	RI=1796.8, 10.0030 min, CYP-2_NP	1.02077	1.34762	1	1.33295	0.89584	0.48415	0.72212
RI=1806.5, 10.0846 min, CYP-2_NP	RI=1806.5, 10.0846 min, CYP-2_NP	1.04471	0.690015	1	1.28614	0.89437	0.48479	0.72212
RI=2653.8, 16.1052 min, CYP-2_NP	RI=2653.8, 16.1052 min, CYP-2_NP	1.10194	1.01019	1	1.2263	0.88969	0.48683	0.723
RI=1193.9, 4.1073 min, CYP-2_NP	RI=1193.9, 4.1073 min, CYP-2_NP	0.913217	0.876669	1	1.14309	0.88535	0.48873	0.72313
RI=1633.5, 8.5444 min, CYP-2_P	RI=1633.5, 8.5444 min, CYP-2_P	1.15901	1.5857	1	1.13093	0.8829	0.48981	0.72313
n/a	3,4,5-Trihydroxypentanoic acid, tetrakistrimethylsilyl-	2.15125	0.945384	1	0.633747	0.86613	0.49726	0.7298
RI=4025.7, 22.8081 min, L12-2_NP	RI=4025.7, 22.8081 min, L12-2_NP	1.33187	0.846248	1	0.865302	0.86731	0.49673	0.7298
RI=4196.2, 23.5173 min, L12-2_P	RI=4196.2, 23.5173 min, L12-2_P	1.32316	1.50724	1	0.882631	0.85308	0.50315	0.73628
RI=2752.7, 16.6888 min, CYP-2_NP	RI=2752.7, 16.6888 min, CYP-2_NP	1.0799	0.733247	1	1.32216	0.84446	0.50707	0.73985
RI=1128.1, 3.4149 min, CYP-2_NP	RI=1128.1, 3.4149 min, CYP-2_NP	0.797537	0.984877	1	2.59273	0.8333	0.5122	0.74275
RI=1841.0, 10.3658 min, CYP-2_P	RI=1841.0, 10.3658 min, CYP-2_P	0.83653	0.95203	1	1.02006	0.83045	0.51353	0.74275
RI=2518.8, 15.2727 min, CYP-2_NP	RI=2518.8, 15.2727 min, CYP-2_NP	1.16937	0.835267	1	1.42552	0.831	0.51327	0.74275
RI=3138.7, 18.7872 min, CYP-2_NP	RI=3138.7, 18.7872 min, CYP-2_NP	0.784014	0.738095	1	0.817347	0.82394	0.51655	0.74497
1-Monomyristin	1-Monomyristin, 2TMS derivative	0.834725	1.22789	1	0.927894	0.80478	0.52558	0.74747
2-8Z,11Z-Heptadeca-8,11-dien-1-yl-4,5-dihydrooxazole	2-8Z,11Z-Heptadeca-8,11-dien-1-yl-4,5-dihydrooxazole	1.16497	1.10438	1	1.05307	0.81246	0.52194	0.74747
RI=1612.4, 8.3558 min, CYP-2_NP	RI=1612.4, 8.3558 min, CYP-2_NP	0.775538	0.711764	1	0.894545	0.81657	0.52001	0.74747
RI=1982.2, 11.5160 min, CYP-2_NP	RI=1982.2, 11.5160 min, CYP-2_NP	1.14053	0.850174	1	0.901278	0.80598	0.52501	0.74747
RI=2016.3, 11.7819 min, WT-2_P	RI=2016.3, 11.7819 min, WT-2_P	1.27971	1.23465	1	1.49332	0.80436	0.52578	0.74747
RI=1163.1, 3.7828 min, CYP-2_NP	RI=1163.1, 3.7828 min, CYP-2_NP	0.743511	0.950927	1	0.954198	0.8012	0.52728	0.74748
RI=1695.5, 9.0984 min, WT-2_NP	RI=1695.5, 9.0984 min, WT-2_NP	0.663099	0.832739	1	0.819263	0.79367	0.53089	0.75047
RI=2876.4, 17.3888 min, CYP-2_NP	RI=2876.4, 17.3888 min, CYP-2_NP	0.813517	0.644556	1	1.37109	0.78595	0.53461	0.75359
RI=1237.6, 4.5686 min, CYP-2_NP	RI=1237.6, 4.5686 min, CYP-2_NP	1.00201	1.15204	1	1.34729	0.77374	0.54056	0.75982
RI=1696.3, 9.1051 min, CYP-2_P	RI=1696.3, 9.1051 min, CYP-2_P	1.42263	1.12794	1	1.05638	0.75615	0.54925	0.76987
RI=1505.1, 7.3125 min, CYP-2_NP	RI=1505.1, 7.3125 min, CYP-2_NP	0.539272	0.538697	1	0.797893	0.74632	0.55416	0.77375
RI=2376.8, 14.3602 min, CYP-2_NP	RI=2376.8, 14.3602 min, CYP-2_NP	1.96351	1.53478	1	1.5048	0.74443	0.55511	0.77375
n/a	Erythrono-1,4-lactone, E-, 2TMS derivative	0.681461	0.601782	1	0.515289	0.73127	0.56178	0.77428
RI=1955.0, 11.2944 min, CYP-2_P	RI=1955.0, 11.2944 min, CYP-2_P	0.584609	0.717845	1	0.81137	0.72512	0.56493	0.77428
RI=2537.3, 15.3899 min, CYP-2_NP	RI=2537.3, 15.3899 min, CYP-2_NP	0.985444	0.983988	1	0.716885	0.73319	0.5608	0.77428
RI=2741.5, 16.6226 min, CYP-2_P	RI=2741.5, 16.6226 min, CYP-2_P	0.914439	1.09329	1	0.821153	0.73607	0.55934	0.77428
RI=2877.6, 17.3957 min, CYP-2_P	RI=2877.6, 17.3957 min, CYP-2_P	0.744917	0.796061	1	0.849809	0.73161	0.56161	0.77428
RI=2897.3, 17.5044 min, CYP-2_NP	RI=2897.3, 17.5044 min, CYP-2_NP	0.328919	0.371117	1	0.520788	0.72141	0.56683	0.77428
RI=3947.7, 22.4835 min, CYP-2_NP	RI=3947.7, 22.4835 min, CYP-2_NP	0.869953	0.883351	1	0.665257	0.72275	0.56614	0.77428
RI=4271.0, 23.8283 min, CYP-2_NP	RI=4271.0, 23.8283 min, CYP-2_NP	1.44893	0.918664	1	1.2896	0.71932	0.56791	0.77428
RI=3251.3, 19.3538 min, CYP-2_NP	RI=3251.3, 19.3538 min, CYP-2_NP	1.05029	1.27635	1	2.01669	0.71615	0.56954	0.77439
Phosphoric acid	Phosphoric acid, bistrimethylsilyl 2,3-bistrimethylsilyloxypropyl ester	1.11274	1.06889	1	1.09029	0.71288	0.57124	0.77458
RI=1363.7, 5.8963 min, L12-2_P	RI=1363.7, 5.8963 min, L12-2_P	0.897058	0.860763	1	0.859015	0.69724	0.57941	0.77609
RI=1727.7, 9.3862 min, L12-2_P	RI=1727.7, 9.3862 min, L12-2_P	1.11456	0.990338	1	1.34921	0.6991	0.57843	0.77609
RI=1996.6, 11.6333 min, CYP-2_P	RI=1996.6, 11.6333 min, CYP-2_P	0.848954	0.895658	1	0.565591	0.69555	0.5803	0.77609
RI=3198.2, 19.0949 min, WT-2_NP	RI=3198.2, 19.0949 min, WT-2_NP	0.901243	0.842898	1	0.688666	0.69293	0.58168	0.77609
RI=3805.0, 21.8897 min, WT-2_P	RI=3805.0, 21.8897 min, WT-2_P	0.672985	0.91467	1	0.616286	0.70185	0.57699	0.77609
Octacosanoate	Trimethylsilyl octacosanoate	1.32549	1.30392	1	1.16275	0.69754	0.57925	0.77609
Phosphorylethanolamine	Phosphorylethanolamine, 4TMS derivative	0.158024	0.828929	1	0.202887	0.68331	0.58678	0.77654
RI=1261.2, 4.8167 min, CYP-2_P	RI=1261.2, 4.8167 min, CYP-2_P	1.10165	1.12411	1	0.798213	0.68045	0.58831	0.77654
RI=1335.1, 5.5956 min, L12-2_P	RI=1335.1, 5.5956 min, L12-2_P	1.42347	1.41072	1	0.923803	0.68022	0.58843	0.77654
RI=1465.0, 6.9175 min, CYP-2_NP	RI=1465.0, 6.9175 min, CYP-2_NP	1	1.27076	1	1.07401	0.67766	0.5898	0.77654
RI=3103.7, 18.6063 min, CYP-2_P	RI=3103.7, 18.6063 min, CYP-2_P	0.967487	0.988292	1	0.673518	0.68752	0.58454	0.77654
Citric acid	Citric acid, 4TMS	1.23332	1.08822	1	0.988526	0.66016	0.59925	0.77803
L-Phenylalanine	L-Phenylalanine, 2TMS derivative	0.830809	0.924242	1	0.985108	0.65951	0.5996	0.77803
RI=1322.7, 5.4650 min, WT-2_NP	RI=1322.7, 5.4650 min, WT-2_NP	0.813984	1.76905	1	1.16283	0.65732	0.60079	0.77803
RI=1346.2, 5.7120 min, CYP-2_NP	RI=1346.2, 5.7120 min, CYP-2_NP	1.04714	1.30859	1	1.13326	0.6554	0.60185	0.77803
RI=1442.1, 6.6932 min, CYP-2_NP	RI=1442.1, 6.6932 min, CYP-2_NP	0.721925	0.783244	1	0.883066	0.67157	0.59307	0.77803
RI=1904.3, 10.8814 min, CYP-2_NP	RI=1904.3, 10.8814 min, CYP-2_NP	1.0636	0.971491	1	0.839912	0.66815	0.59492	0.77803
RI=1945.7, 11.2187 min, CYP-2_P	RI=1945.7, 11.2187 min, CYP-2_P	0.887607	1.47018	1	1.43988	0.65882	0.59998	0.77803
RI=2825.2, 17.1068 min, CYP-2_P	RI=2825.2, 17.1068 min, CYP-2_P	0.659281	0.69398	1	0.753578	0.64638	0.60679	0.7824
RI=1803.6, 10.0617 min, CYP-2_P	RI=1803.6, 10.0617 min, CYP-2_P	0.759907	2.5948	1	2.93539	0.64001	0.61031	0.78491
RI=2475.7, 14.9992 min, CYP-2_P	RI=2475.7, 14.9992 min, CYP-2_P	0.532443	0.622756	1	0.942451	0.62657	0.6178	0.79047
RI=3773.0, 21.7512 min, CYP-2_NP	RI=3773.0, 21.7512 min, CYP-2_NP	1.29403	1.18177	1	1.46143	0.62939	0.61622	0.79047
RI=1167.9, 3.8337 min, CYP-2_NP	RI=1167.9, 3.8337 min, CYP-2_NP	2.13708	2.15817	1	4.35149	0.62012	0.62143	0.79308
Ascorbic acid	Ascorbic acid, 4TMS derivative	0.814502	0.720167	1	0.726489	0.61228	0.62586	0.79467
Pantothenic acid	Pantothenic acid tritms	0.56349	1.83128	1	0.866569	0.61406	0.62485	0.79467
RI=2390.0, 14.4503 min, CYP-2_P	RI=2390.0, 14.4503 min, CYP-2_P	1.3011	1.1637	1	1.03053	0.60817	0.6282	0.79529
RI=4002.8, 22.7128 min, CYP-2_NP	RI=4002.8, 22.7128 min, CYP-2_NP	1.39219	0.936107	1	1.45368	0.60303	0.63113	0.79529
RI=4044.5, 22.8862 min, L12-2_NP	RI=4044.5, 22.8862 min, L12-2_NP	1.09351	1.00837	1	0.999763	0.60472	0.63017	0.79529
RI=1856.5, 10.4924 min, L12-2_NP	RI=1856.5, 10.4924 min, L12-2_NP	1.38192	1.125	1	0.992647	0.59707	0.63455	0.79758
RI=3056.1, 18.3599 min, CYP-2_P	RI=3056.1, 18.3599 min, CYP-2_P	0.993482	1.24	1	0.855644	0.59214	0.63739	0.79914
L-5-Oxoproline	L-5-Oxoproline, , 2TMS derivative	0.945641	0.642566	1	0.898576	0.58222	0.64314	0.80231
RI=2060.8, 12.1132 min, CYP-2_NP	RI=2060.8, 12.1132 min, CYP-2_NP	1.25665	0.896718	1	1.08463	0.58269	0.64287	0.80231
RI=2813.8, 17.0439 min, CYP-2_NP	RI=2813.8, 17.0439 min, CYP-2_NP	1.55979	1.49368	1	1.34431	0.57827	0.64544	0.80318
RI=2343.5, 14.1317 min, CYP-2_P	RI=2343.5, 14.1317 min, CYP-2_P	1.21731	1.12374	1	0.975095	0.5741	0.64788	0.80422
L-Methionine	L-Methionine, 2TMS derivative	1.20089	1.06994	1	1.27827	0.56513	0.65316	0.80875
RI=1568.0, 7.9303 min, WT-2_P	RI=1568.0, 7.9303 min, WT-2_P	0.997262	0.981311	1	0.874134	0.55926	0.65663	0.81104
RI=1333.5, 5.5786 min, CYP-2_NP	RI=1333.5, 5.5786 min, CYP-2_NP	0.684468	0.948512	1	0.838701	0.54609	0.66449	0.81469
RI=1886.5, 10.7362 min, CYP-2_P	RI=1886.5, 10.7362 min, CYP-2_P	0.988644	1.01639	1	0.801783	0.55114	0.66147	0.81469
RI=2016.1, 11.7811 min, CYP-2_NP	RI=2016.1, 11.7811 min, CYP-2_NP	1.06931	0.868317	1	1.09505	0.54779	0.66347	0.81469
Docosanol	Docosanol, TMS derivative	1.02661	1.02312	1	0.960733	0.53206	0.67295	0.82305
RI=2758.4, 16.7228 min, CYP-2_NP	RI=2758.4, 16.7228 min, CYP-2_NP	0.986345	0.948004	1	0.952206	0.5167	0.68232	0.82917
RI=3040.5, 18.2792 min, CYP-2_P	RI=3040.5, 18.2792 min, CYP-2_P	0.535768	1.03875	1	0.914307	0.51568	0.68294	0.82917
RI=3721.2, 21.5252 min, CYP-2_NP	RI=3721.2, 21.5252 min, CYP-2_NP	0.95947	0.735017	1	0.802628	0.51952	0.68059	0.82917
RI=3250.0, 19.3471 min, WT-2_P	RI=3250.0, 19.3471 min, WT-2_P	1.05923	0.928273	1	1.06065	0.5089	0.68711	0.83221
RI=1808.1, 10.0982 min, CYP-2_P	RI=1808.1, 10.0982 min, CYP-2_P	1.00196	0.770829	1	0.732726	0.50611	0.68884	0.83228
RI=1327.2, 5.5115 min, CYP-2_NP	RI=1327.2, 5.5115 min, CYP-2_NP	0.986457	0.740843	1	0.876885	0.50121	0.69187	0.83393
RI=2496.0, 15.1282 min, CYP-2_NP	RI=2496.0, 15.1282 min, CYP-2_NP	0.355032	1.09791	1	0.570263	0.49629	0.69494	0.8356
Pyroglutamic acid	Pyroglutamic acid, TMS derivative	1.20519	1.33938	1	1.26697	0.48464	0.70222	0.8403
RI=2566.6, 15.5760 min, L12-2_NP	RI=2566.6, 15.5760 min, L12-2_NP	1.30383	1.34499	1	1.88382	0.48701	0.70073	0.8403
RI=1895.5, 10.8101 min, CYP-2_NP	RI=1895.5, 10.8101 min, CYP-2_NP	1.02744	1.09262	1	1.27616	0.47836	0.70618	0.84208
RI=4318.7, 24.0270 min, L12-2_NP	RI=4318.7, 24.0270 min, L12-2_NP	1.4967	1.83656	1	0.727639	0.47693	0.70708	0.84208
4-Aminobutanoic acid	4-Aminobutanoic acid, 3TMS derivative	1.05871	0.923615	1	1.01391	0.47408	0.70888	0.84221
RI=1614.8, 8.3770 min, CYP-2_NP	RI=1614.8, 8.3770 min, CYP-2_NP	0.572673	0.773669	1	0.911401	0.45776	0.71926	0.84649
RI=1965.6, 11.3809 min, CYP-2_NP	RI=1965.6, 11.3809 min, CYP-2_NP	1.46264	1.19659	1	1.18264	0.4628	0.71604	0.84649
RI=3219.7, 19.2000 min, CYP-2_NP	RI=3219.7, 19.2000 min, CYP-2_NP	1.324	1.44065	1	1.39966	0.46001	0.71782	0.84649
RI=3912.6, 22.3373 min, CYP-2_NP	RI=3912.6, 22.3373 min, CYP-2_NP	0.868436	1.14139	1	1.0826	0.46239	0.7163	0.84649
Glycine	Glycine, 3TMS derivative	0.890046	0.942214	1	0.992827	0.45123	0.72345	0.84942
Linolenic acid	Linolenic acid-like	0.987351	0.895954	1	0.8667	0.44632	0.72661	0.84996
Malic acid	Malic acid, 3TMS derivative	1.01103	1.06414	1	1.06259	0.44522	0.72732	0.84996
RI=1187.3, 4.0384 min, L12-2_P	RI=1187.3, 4.0384 min, L12-2_P	0.884494	1.22627	1	1.30222	0.43951	0.73101	0.85228
Benzoic Acid	Benzoic Acid, TMS derivative	0.98798	1.02589	1	1.09154	0.43123	0.73639	0.85654
1-Monolinolein	1-Monolinolein, 2TMS derivative	0.941621	0.907398	1	0.928535	0.42372	0.74129	0.85921
Docosanoic acid	Docosanoic acid, TMS ester	1.07035	1.11877	1	1.03197	0.42244	0.74212	0.85921
RI=2201.5, 13.1591 min, L12-2_NP	RI=2201.5, 13.1591 min, L12-2_NP	1.01244	0.901757	1	0.841451	0.41271	0.74851	0.86104
RI=2612.3, 15.8607 min, WT-2_NP	RI=2612.3, 15.8607 min, WT-2_NP	1.61292	1.44128	1	1.63453	0.41437	0.74742	0.86104
RI=3107.8, 18.6275 min, CYP-2_NP	RI=3107.8, 18.6275 min, CYP-2_NP	1.06001	1.04329	1	0.990442	0.41215	0.74888	0.86104
RI=1749.1, 9.5776 min, WT-2_NP	RI=1749.1, 9.5776 min, WT-2_NP	1.17632	1.02132	1	0.989236	0.40541	0.75332	0.86287
RI=2423.6, 14.6686 min, CYP-2_NP	RI=2423.6, 14.6686 min, CYP-2_NP	0.904801	0.5625	1	0.712748	0.4045	0.75393	0.86287
RI=2647.7, 16.0696 min, CYP-2_P	RI=2647.7, 16.0696 min, CYP-2_P	1.0022	1.05157	1	0.764554	0.395	0.76022	0.86808
RI=3061.8, 18.3896 min, CYP-2_NP	RI=3061.8, 18.3896 min, CYP-2_NP	1.24557	1.18864	1	1.0434	0.38943	0.76393	0.87032
RI=1460.0, 6.8692 min, L12-2_NP	RI=1460.0, 6.8692 min, L12-2_NP	1.03372	1.04002	1	1.13444	0.38241	0.76862	0.87367
RI=2240.4, 13.4259 min, WT-2_P	RI=2240.4, 13.4259 min, WT-2_P	1.25165	0.75781	1	1.05389	0.37616	0.77281	0.87445
RI=2300.7, 13.8386 min, CYP-2_NP	RI=2300.7, 13.8386 min, CYP-2_NP	0.818952	0.917565	1	1.04622	0.37825	0.7714	0.87445
RI=1648.5, 8.6786 min, CYP-2_NP	RI=1648.5, 8.6786 min, CYP-2_NP	0.877871	1.07307	1	1.00992	0.36781	0.77842	0.87881
RI=2137.4, 12.6833 min, CYP-2_P	RI=2137.4, 12.6833 min, CYP-2_P	0.970557	1.30125	1	1.0048	0.36112	0.78293	0.88191
Pentacosanoic acid	Pentacosanoic acid, trimethylsilyl ester	1.00476	0.883571	1	1.11951	0.34186	0.79599	0.88267
RI=1230.5, 4.4930 min, CYP-2_P	RI=1230.5, 4.4930 min, CYP-2_P	1.47884	1.13385	1	1.12466	0.34769	0.79203	0.88267
RI=1547.0, 7.7237 min, CYP-2_P	RI=1547.0, 7.7237 min, CYP-2_P	0.882483	0.916482	1	0.874353	0.34685	0.7926	0.88267
RI=1736.0, 9.4602 min, CYP-2_P	RI=1736.0, 9.4602 min, CYP-2_P	1.48524	1.31779	1	1.37385	0.34189	0.79597	0.88267
RI=1858.8, 10.5110 min, CYP-2_NP	RI=1858.8, 10.5110 min, CYP-2_NP	1.06257	1.15652	1	0.911968	0.34949	0.79081	0.88267
RI=2214.9, 13.2508 min, CYP-2_NP	RI=2214.9, 13.2508 min, CYP-2_NP	0.911007	1.14014	1	0.921831	0.34814	0.79173	0.88267
RI=2741.4, 16.6225 min, CYP-2_NP	RI=2741.4, 16.6225 min, CYP-2_NP	1.15632	1.10244	1	0.968951	0.34959	0.79074	0.88267
Fumaric acid	Fumaric acid, bis-TMS	0.85906	0.914669	1	0.866731	0.3343	0.80115	0.88569
RI=1619.0, 8.4145 min, L12-2_NP	RI=1619.0, 8.4145 min, L12-2_NP	1.07892	1.1549	1	1.32549	0.33266	0.80227	0.88569
RI=2977.7, 17.9470 min, CYP-2_P	RI=2977.7, 17.9470 min, CYP-2_P	0.861888	1.05072	1	1.22366	0.32921	0.80463	0.88633
RI=1217.7, 4.3580 min, CYP-2_P	RI=1217.7, 4.3580 min, CYP-2_P	0.738186	0.959132	1	0.806641	0.32618	0.8067	0.88666
RI=1512.9, 7.3890 min, CYP-2_NP	RI=1512.9, 7.3890 min, CYP-2_NP	1.03633	0.872806	1	0.988218	0.30968	0.81802	0.8938
RI=3229.9, 19.2494 min, WT-2_P	RI=3229.9, 19.2494 min, WT-2_P	0.853207	0.885511	1	0.851781	0.31221	0.81628	0.8938
RI=4029.0, 22.8216 min, CYP-2_P	RI=4029.0, 22.8216 min, CYP-2_P	0.948957	0.733903	1	0.818327	0.30628	0.82036	0.8938
RI=4031.6, 22.8326 min, L12-2_NP	RI=4031.6, 22.8326 min, L12-2_NP	1.02519	1.16478	1	0.877587	0.30743	0.81956	0.8938
RI=1600.6, 8.2504 min, CYP-2_P	RI=1600.6, 8.2504 min, CYP-2_P	1.47569	1.12685	1	1.31772	0.2951	0.82805	0.90022
15-Tetracosenoic acid	15-Tetracosenoic acid, Z-, TMS derivative	1.2509	1.27107	1	0.955582	0.27264	0.84356	0.90025
Butanedioic acid	Butanedioic acid, 2TMS derivative	0.861982	0.895301	1	0.873953	0.27817	0.83974	0.90025
Decanedioic acid, dibutyl ester	Decanedioic acid, dibutyl ester	0.792164	0.868404	1	0.963415	0.26867	0.84631	0.90025
Ferulic acid	Ferulic acid, trimethylsiloxy, trimethylsilyl ester	0.698468	0.878418	1	0.862517	0.26708	0.8474	0.90025
RI=1173.0, 3.8873 min, L12-2_NP	RI=1173.0, 3.8873 min, L12-2_NP	0.930032	1.07133	1	1.06134	0.2818	0.83723	0.90025
RI=1379.0, 6.0577 min, L12-2_P	RI=1379.0, 6.0577 min, L12-2_P	0.942109	1.04609	1	0.937816	0.28972	0.83177	0.90025
RI=1902.9, 10.8705 min, CYP-2_P	RI=1902.9, 10.8705 min, CYP-2_P	1.10719	0.872678	1	0.925028	0.28265	0.83665	0.90025
RI=2101.1, 12.4131 min, CYP-2_NP	RI=2101.1, 12.4131 min, CYP-2_NP	1.14351	0.843137	1	0.982061	0.28465	0.83526	0.90025
RI=3175.5, 18.9776 min, WT-2_P	RI=3175.5, 18.9776 min, WT-2_P	1.03088	1.05613	1	0.954813	0.26748	0.84712	0.90025
RI=3192.8, 19.0667 min, CYP-2_P	RI=3192.8, 19.0667 min, CYP-2_P	0.958116	1.05877	1	0.737477	0.28487	0.83511	0.90025
RI=3783.3, 21.7962 min, CYP-2_NP	RI=3783.3, 21.7962 min, CYP-2_NP	0.921544	0.964108	1	0.571036	0.26631	0.84793	0.90025
RI=2369.3, 14.3084 min, CYP-2_NP	RI=2369.3, 14.3084 min, CYP-2_NP	0.760692	0.839308	1	0.90283	0.25735	0.85413	0.90491
Octanoic acid	Octanoic acid, trimethylsilyl ester	0.991255	0.986259	1	1.10369	0.24794	0.86063	0.90986
Glycerol monostearate	Glycerol monostearate, 2TMS derivative	1.10509	1.41254	1	1.17818	0.24212	0.86464	0.91137
RI=1160.1, 3.7522 min, CYP-2_NP	RI=1160.1, 3.7522 min, CYP-2_NP	0.932005	1.00879	1	1.02169	0.23925	0.86662	0.91137
RI=1915.6, 10.9732 min, CYP-2_NP	RI=1915.6, 10.9732 min, CYP-2_NP	1.01562	1.07812	1	1.35085	0.23792	0.86754	0.91137
Lignoceric acid	Lignoceric acid, TMS derivative	0.996887	1.0753	1	1.05981	0.23162	0.87187	0.91269
RI=3692.0, 21.3978 min, CYP-2_NP	RI=3692.0, 21.3978 min, CYP-2_NP	1.16251	1.08789	1	1.06189	0.23078	0.87245	0.91269
RI=1672.5, 8.8927 min, CYP-2_NP	RI=1672.5, 8.8927 min, CYP-2_NP	0.857939	0.892758	1	0.892758	0.20697	0.88877	0.92781
n/a	Phosphoric acid, 1-trimethylsilyloxymethyl-1,2-ethanediyl tetrakistrimethylsilyl ester	1.00126	1.13962	1	0.971069	0.20209	0.89209	0.92934
RI=3071.7, 18.4405 min, CYP-2_NP	RI=3071.7, 18.4405 min, CYP-2_NP	0.925489	0.952769	1	0.956433	0.16236	0.91872	0.95319
RI=3148.6, 18.8382 min, CYP-2_P	RI=3148.6, 18.8382 min, CYP-2_P	0.709064	0.885343	1	0.94461	0.16223	0.91881	0.95319
1-Monopalmitin	1-Monopalmitin, 2TMS derivative	0.957115	1.15999	1	1.05395	0.14916	0.92734	0.9533
RI=1557.0, 7.8223 min, CYP-2_NP	RI=1557.0, 7.8223 min, CYP-2_NP	1.02309	0.95806	1	1.17772	0.15449	0.92387	0.9533
RI=1562.7, 7.8783 min, CYP-2_P	RI=1562.7, 7.8783 min, CYP-2_P	1.01368	1.01115	1	0.939347	0.15426	0.92402	0.9533
RI=1584.8, 8.0959 min, CYP-2_P	RI=1584.8, 8.0959 min, CYP-2_P	0.886364	0.995028	1	0.737216	0.14502	0.93001	0.9533
RI=1870.5, 10.6062 min, CYP-2_NP	RI=1870.5, 10.6062 min, CYP-2_NP	0.840066	0.822754	1	0.918384	0.14445	0.93037	0.9533
RI=2104.1, 12.4352 min, CYP-2_NP	RI=2104.1, 12.4352 min, CYP-2_NP	1.04098	1.02488	1	1.13232	0.14675	0.92889	0.9533
RI=2058.0, 12.0929 min, CYP-2_NP	RI=2058.0, 12.0929 min, CYP-2_NP	1.15628	1.05465	1	1.10208	0.13265	0.93789	0.95903
RI=1131.9, 3.4548 min, CYP-2_NP	RI=1131.9, 3.4548 min, CYP-2_NP	0.90625	1.05957	1	0.960938	0.12692	0.94148	0.95953
Triacontanoate	Trimethylsilyl triacontanoate	1.13	0.673625	1	0.938812	0.12573	0.94222	0.95953
RI=1860.2, 10.5221 min, CYP-2_NP	RI=1860.2, 10.5221 min, CYP-2_NP	1.04214	1.1712	1	1.1115	0.11148	0.95095	0.96448
RI=3895.6, 22.2668 min, CYP-2_NP	RI=3895.6, 22.2668 min, CYP-2_NP	1.11828	1.06054	1	1.01374	0.1132	0.94991	0.96448
Hexacosanoic acid	Hexacosanoic acid, TMS derivative	1.11825	1.0689	1	1.09497	0.076575	0.9709	0.97481
RI=1651.7, 8.7066 min, CYP-2_NP	RI=1651.7, 8.7066 min, CYP-2_NP	1.00502	1.02341	1	1.11037	0.086079	0.96571	0.97481
RI=1753.5, 9.6165 min, CYP-2_P	RI=1753.5, 9.6165 min, CYP-2_P	0.915466	1.01547	1	0.983519	0.081909	0.96801	0.97481
RI=1991.8, 11.5942 min, CYP-2_NP	RI=1991.8, 11.5942 min, CYP-2_NP	1.05275	1.13033	1	1.10989	0.082694	0.96758	0.97481
RI=3706.4, 21.4606 min, CYP-2_NP	RI=3706.4, 21.4606 min, CYP-2_NP	1.0533	1.08483	1	0.980658	0.07847	0.96988	0.97481
RI=1235.1, 4.5421 min, L12-2_P	RI=1235.1, 4.5421 min, L12-2_P	1.09044	1.15607	1	1.13659	0.060924	0.97896	0.98093
RI=3173.6, 18.9673 min, CYP-2_P	RI=3173.6, 18.9673 min, CYP-2_P	1.00466	1.01849	1	1.01121	0.0040304	0.99962	0.99962

## Sheet: At-Shoot
Table S6. Mean fold change of metabolites in Arabidopsis
		Mean fold change of metabolites in Arabidopsis shoot (Relative to Col-0)				ANOVA analysis
Common Name	Library Name	Atcyp710a1	Col-0	L12	L13	F statistic	p value	FDR
Sitosterol	Beta-Sitosterol, TMS derivative	0.979093	1	0.460773	0.218337	401.68	4.643e-09	8.52e-07
Stigmasterol	Stigmasterol, TMS derivative	0.111951	1	16.6237	25.2075	403.53	4.5592e-09	8.52e-07
Isofucosterol	Isofucosterol, TMS	0.985896	1	0.670552	0.560915	116.57	6.1009e-07	7.4635e-05
Sitosteryl glucoside	Sitosteryl glucoside	1.15436	1	0.487676	0.262715	73.722	3.6034e-06	0.00027747
Stigmasteryl glucoside	Stigmasteryl glucoside	0	0	1	1.59608	72.809	3.7803e-06	0.00027747
Glycine	Glycine, 3TMS derivative	0.583331	1	0.482251	0.498008	16.744	0.00082693	0.043355
Palmitic Acid	Palmitic Acid, TMS derivative	0.892868	1	0.98491	0.907361	17.373	0.00072936	0.043355
Malic acid	Malic acid, 3TMS derivative	0.803687	1	0.608377	0.559615	13.355	0.001758	0.08065
Glyceric acid	Glyceric acid, 3TMS	0.893754	1	0.589616	0.533833	12.153	0.0023867	0.097324
11-Eicosenoic acid	11-Eicosenoic acid, Z-, TMS derivative	0.398072	1	3.85993	1.65152	11.087	0.0031964	0.10599
Brassicasterol	Brassicasterol, TMS	0.954295	1	1.31883	1.87001	10.805	0.0034655	0.10599
RI=2114.3, 12.5117 min, CYP-2_P	RI=2114.3, 12.5117 min, CYP-2_P	1.09723	1	0.809695	0.789534	11.03	0.0032484	0.10599
RI=1721.4, 9.3293 min, CYP-2_P	RI=1721.4, 9.3293 min, CYP-2_P	2.65528	1	1.33885	1.1116	10.358	0.0039538	0.11162
Fructose	Fructose	0.965124	1	1.32906	1.3728	9.7759	0.004725	0.12386
RI=1965.6, 11.3809 min, CYP-2_NP	RI=1965.6, 11.3809 min, CYP-2_NP	1.43966	1	1.01889	0.874082	9.4058	0.0053146	0.13003
Campesterol	Campesterol, TMS derivative	0.969837	1	0.877841	0.858943	9.0728	0.0059255	0.13592
L-Methionine	L-Methionine, 2TMS derivative	0.689476	1	0.846154	0.884851	8.6832	0.0067559	0.14585
RI=2288.9, 13.7580 min, CYP-2_P	RI=2288.9, 13.7580 min, CYP-2_P	2.44539	1	0.841469	0.922185	8.0095	0.0085657	0.17464
Butyl caprylate	Butyl caprylate	0.868469	1	0.995315	0.89848	7.6193	0.0098938	0.18401
RI=1945.7, 11.2187 min, CYP-2_P	RI=1945.7, 11.2187 min, CYP-2_P	1.23741	1	1.03308	2.82858	7.5836	0.010028	0.18401
RI=1514.3, 7.4026 min, CYP-2_NP	RI=1514.3, 7.4026 min, CYP-2_NP	0.867485	1	0.999015	0.884963	7.3024	0.011166	0.19514
Aspartic acid	Aspartic acid	1.17037	1	1.31244	1.33368	7.0527	0.012315	0.20544
n/a	Decanedioic acid, bis2-ethylhexyl ester - like	0.88399	1	1.09651	0.908674	6.7365	0.01399	0.20563
Diethylene glycol	Diethylene glycol, 2TMS derivative	0.835068	1	0.978483	0.855653	6.7897	0.013689	0.20563
RI=1525.6, 7.5139 min, CYP-2_P	RI=1525.6, 7.5139 min, CYP-2_P	0.604898	1	1.01084	1.15091	6.6798	0.01432	0.20563
RI=1547.0, 7.7237 min, CYP-2_P	RI=1547.0, 7.7237 min, CYP-2_P	1.34971	1	1.3353	1.66431	6.5755	0.014952	0.20563
Threonine	Threonine	1.10819	1	0.940294	0.934137	6.5474	0.015128	0.20563
Glucose	Glucose	0.888261	1	1.3226	1.4318	6.4023	0.016081	0.21077
Alpha-ketoglutaric acid	Alpha-ketoglutaric acid meox2 2TMS	0.735786	1	0.493298	0.442578	6.1965	0.017564	0.22227
RI=2430.4, 14.7120 min, CYP-2_P	RI=2430.4, 14.7120 min, CYP-2_P	1.32999	1	0.730526	0.936531	6.0187	0.018984	0.23224
Dodecanoic acid	Dodecanoic acid, trimethylsilyl ester	0.643879	1	0.914149	0.678325	5.6848	0.02206	0.26116
RI=1541.0, 7.6651 min, CYP-2_NP	RI=1541.0, 7.6651 min, CYP-2_NP	0.879123	1	0.990159	0.89203	5.5099	0.023921	0.27434
L-Ornithine	L-Ornithine, 4TMS derivative	0.951905	1	0.761992	0.61961	5.2211	0.02744	0.29619
RI=2244.1, 13.4513 min, CYP-2_P	RI=2244.1, 13.4513 min, CYP-2_P	0.52955	1	0.491789	0.786277	5.2453	0.027121	0.29619
Maltose	Maltose, 8TMS derivative , isomer 1	1.19345	1	0.863034	0.930083	4.9654	0.031109	0.31714
RI=3528.3, 20.6663 min, CYP-2_P	RI=3528.3, 20.6663 min, CYP-2_P	1.86889	1	0.924911	1.07867	4.9691	0.031052	0.31714
RI=1736.0, 9.4602 min, CYP-2_P	RI=1736.0, 9.4602 min, CYP-2_P	2.54352	1	1.76306	1.19077	4.86	0.032799	0.32533
L-5-Oxoproline	L-5-Oxoproline, , 2TMS derivative	0.901338	1	0.960519	0.81889	4.79	0.033984	0.3271
RI=1162.2, 3.7734 min, CYP-2_P	RI=1162.2, 3.7734 min, CYP-2_P	0.510769	1	0.786462	0.811077	4.6772	0.036007	0.3271
RI=1331.9, 5.5617 min, CYP-2_NP	RI=1331.9, 5.5617 min, CYP-2_NP	1.50417	1	1.4553	1.16925	4.6487	0.036542	0.3271
Stearic acid	Stearic acid, TMS derivative	0.919556	1	1.02146	0.925385	4.6684	0.036171	0.3271
Asparagine	Asparagine	0.850405	1	0.886918	0.80348	4.5358	0.03876	0.32781
Fumaric acid	Fumaric acid, bis-TMS	1.11476	1	0.813834	0.777787	4.5935	0.037606	0.32781
RI=1803.6, 10.0617 min, CYP-2_P	RI=1803.6, 10.0617 min, CYP-2_P	1.70111	1	0.965519	1.1619	4.5095	0.039302	0.32781
RI=1256.4, 4.7657 min, CYP-2_NP	RI=1256.4, 4.7657 min, CYP-2_NP	0.734588	1	0.842258	0.568379	4.4272	0.041055	0.33483
RI=1728.2, 9.3905 min, CYP-2_P	RI=1728.2, 9.3905 min, CYP-2_P	0.661631	1	0.717523	0.865559	4.263	0.044852	0.34957
RI=2188.3, 13.0622 min, CYP-2_NP	RI=2188.3, 13.0622 min, CYP-2_NP	0.789544	1	0.875796	0.776716	4.228	0.04572	0.34957
RI=2856.0, 17.2767 min, CYP-2_P	RI=2856.0, 17.2767 min, CYP-2_P	2.35672	1	1.41439	1.65042	4.2338	0.045573	0.34957
RI=1563.7, 7.8877 min, CYP-2_P	RI=1563.7, 7.8877 min, CYP-2_P	0.764759	1	1.22922	1.0364	4.1224	0.048457	0.36294
RI=1441.4, 6.6856 min, CYP-2_NP	RI=1441.4, 6.6856 min, CYP-2_NP	0.6286	1	1.12279	0.646791	3.9443	0.053555	0.37085
RI=1700.7, 9.1450 min, CYP-2_P	RI=1700.7, 9.1450 min, CYP-2_P	0.750769	1	0.695385	0.492462	3.9657	0.052909	0.37085
RI=1757.2, 9.6496 min, CYP-2_P	RI=1757.2, 9.6496 min, CYP-2_P	1.36502	1	0.967211	1.01145	3.9858	0.05231	0.37085
RI=2746.5, 16.6523 min, CYP-2_P	RI=2746.5, 16.6523 min, CYP-2_P	1.05063	1	0.878582	1.08027	4.0156	0.051438	0.37085
Urea	Urea, 2TMS derivative	0.659821	1	0.676536	0.537787	3.8691	0.055908	0.37997
L-Phenylalanine	L-Phenylalanine, 2TMS derivative	0.908789	1	0.791202	0.851501	3.7171	0.061066	0.40031
RI=1978.9, 11.4888 min, WT-2_P	RI=1978.9, 11.4888 min, WT-2_P	1.39154	1	0.923402	1.13373	3.7166	0.061083	0.40031
RI=2350.0, 14.1768 min, CYP-2_P	RI=2350.0, 14.1768 min, CYP-2_P	2.04806	1	0.935821	1.71615	3.6154	0.064847	0.41753
RI=2395.2, 14.4859 min, L12-2_P	RI=2395.2, 14.4859 min, L12-2_P	0.55293	1	1.12535	1.01975	3.5418	0.067767	0.4288
RI=1209.6, 4.2729 min, CYP-2_NP	RI=1209.6, 4.2729 min, CYP-2_NP	0.86864	1	0.977746	0.876125	3.3603	0.075695	0.44426
RI=2084.5, 12.2900 min, CYP-2_P	RI=2084.5, 12.2900 min, CYP-2_P	1.00296	1	1.24173	1.54185	3.3482	0.076262	0.44426
RI=2210.9, 13.2236 min, CYP-2_P	RI=2210.9, 13.2236 min, CYP-2_P	0.673544	1	0.569175	0.752427	3.3625	0.075589	0.44426
RI=3739.5, 21.6051 min, CYP-2_NP	RI=3739.5, 21.6051 min, CYP-2_NP	1.93931	1	0.800137	1.16257	3.3572	0.075838	0.44426
Tetradecanoic acid	Tetradecanoic acid, trimethylsilyl ester	0.889812	1	0.955711	0.836994	3.4203	0.072952	0.44426
RI=2091.7, 12.3435 min, CYP-2_P	RI=2091.7, 12.3435 min, CYP-2_P	1.39913	1	0.492589	0.96504	3.2516	0.080993	0.46445
Glutamic acid	Glutamic acid	1.30223	1	0.953475	0.892391	3.1345	0.087222	0.4724
RI=1132.3, 3.4591 min, CYP-2_NP	RI=1132.3, 3.4591 min, CYP-2_NP	0.852227	1	0.967277	0.870565	3.1765	0.08492	0.4724
RI=1379.4, 6.0620 min, CYP-2_NP	RI=1379.4, 6.0620 min, CYP-2_NP	0.90585	1	0.768242	0.590517	3.091	0.089688	0.4724
RI=1397.2, 6.2498 min, CYP-2_P	RI=1397.2, 6.2498 min, CYP-2_P	0.682415	1	0.654781	0.626172	3.1197	0.088051	0.4724
RI=1796.8, 10.0030 min, CYP-2_NP	RI=1796.8, 10.0030 min, CYP-2_NP	0.969535	1	1.48668	1.54673	3.1325	0.087335	0.4724
RI=1796.9, 10.0039 min, CYP-2_P	RI=1796.9, 10.0039 min, CYP-2_P	1.18145	1	0.771126	0.957718	3.0838	0.090104	0.4724
RI=1696.3, 9.1051 min, CYP-2_P	RI=1696.3, 9.1051 min, CYP-2_P	1.09651	1	1.05377	1.36774	2.9933	0.095545	0.49387
RI=2717.0, 16.4781 min, CYP-2_NP	RI=2717.0, 16.4781 min, CYP-2_NP	0.861481	1	1.00396	0.917431	2.9594	0.097689	0.49794
RI=2462.8, 14.9176 min, CYP-2_P	RI=2462.8, 14.9176 min, CYP-2_P	0.692215	1	0.873581	0.895345	2.8698	0.10364	0.52104
Citric acid	Citric acid, 4TMS	1.83098	1	1.85068	1.59995	2.8243	0.10684	0.52985
Octanoic acid	Octanoic acid, trimethylsilyl ester	0.801693	1	0.922007	0.792624	2.7507	0.11226	0.54932
n/a	1-Trimethylsilyl-3-trimethylsilyloxyurea	0.839856	1	0.90778	0.782309	2.7257	0.11418	0.55136
1-Triacontanol	1-Triacontanol, TMS derivative	0.491468	1	0.787533	1.45059	2.55	0.12888	0.56818
Butanedioic acid	Butanedioic acid, 2TMS derivative	1.40351	1	1.44547	1.35866	2.5487	0.129	0.56818
Pentadecanoic acid	Pentadecanoic acid, TMS derivative	0.731727	1	1.35858	0.916314	2.5371	0.13005	0.56818
RI=1988.9, 11.5704 min, CYP-2_P	RI=1988.9, 11.5704 min, CYP-2_P	0.853416	1	1.69163	1.6905	2.5723	0.12689	0.56818
RI=2166.6, 12.9008 min, CYP-2_P	RI=2166.6, 12.9008 min, CYP-2_P	0.723176	1	0.929604	1.10091	2.6454	0.12063	0.56818
RI=2841.1, 17.1943 min, CYP-2_P	RI=2841.1, 17.1943 min, CYP-2_P	1.11876	1	1.26101	1.36541	2.6303	0.12189	0.56818
RI=2956.2, 17.8289 min, CYP-2_NP	RI=2956.2, 17.8289 min, CYP-2_NP	1.50168	1	0.786531	0.790978	2.5993	0.12453	0.56818
RI=4157.0, 23.3542 min, CYP-2_P	RI=4157.0, 23.3542 min, CYP-2_P	2.58855	1	1.04515	1.61822	2.5753	0.12663	0.56818
Eicosanoic acid	Eicosanoic acid, trimethylsilyl ester	0.840264	1	1.0284	1.0289	2.4903	0.13441	0.58031
RI=2137.4, 12.6833 min, CYP-2_P	RI=2137.4, 12.6833 min, CYP-2_P	0.803532	1	0.973724	1.23955	2.4479	0.1385	0.59103
RI=2854.6, 17.2690 min, L12-2_P	RI=2854.6, 17.2690 min, L12-2_P	1.72866	1	0.932649	1.32434	2.4214	0.14114	0.59538
RI=1743.4, 9.5264 min, CYP-2_NP	RI=1743.4, 9.5264 min, CYP-2_NP	1.0574	1	0.683496	0.73968	2.3594	0.14755	0.61537
RI=3904.6, 22.3042 min, CYP-2_P	RI=3904.6, 22.3042 min, CYP-2_P	2.02702	1	2.8364	2.4136	2.3332	0.15037	0.62008
4-Aminobutanoic acid	4-Aminobutanoic acid, 3TMS derivative	1.0928	1	0.65062	2.14465	2.2132	0.16415	0.6246
n/a	C14a-Homo-27-norgammacer-13-en-21-ol, 3-methoxy-, 3a,21a	0.550159	1	0.842357	1.01035	2.1992	0.16585	0.6246
RI=1183.1, 3.9943 min, CYP-2_NP	RI=1183.1, 3.9943 min, CYP-2_NP	0.574655	1	0.522455	0.405498	2.3058	0.15338	0.6246
RI=1395.5, 6.2320 min, CYP-2_NP	RI=1395.5, 6.2320 min, CYP-2_NP	1.24373	1	0.953765	1.41413	2.2636	0.15818	0.6246
RI=1545.5, 7.7093 min, CYP-2_NP	RI=1545.5, 7.7093 min, CYP-2_NP	0.612091	1	0.902445	0.861715	2.1984	0.16595	0.6246
RI=2657.2, 16.1256 min, CYP-2_P	RI=2657.2, 16.1256 min, CYP-2_P	3.41638	1	1.99147	2.55973	2.1644	0.17019	0.6246
RI=2805.5, 16.9981 min, CYP-2_P	RI=2805.5, 16.9981 min, CYP-2_P	1.38528	1	1.47547	2.04906	2.1859	0.1675	0.6246
RI=3330.4, 19.7386 min, CYP-2_NP	RI=3330.4, 19.7386 min, CYP-2_NP	1.04577	1	0.705466	1.6513	2.1754	0.16881	0.6246
RI=3330.6, 19.7395 min, CYP-2_P	RI=3330.6, 19.7395 min, CYP-2_P	0.962414	1	0.89195	1.10496	2.1667	0.16991	0.6246
RI=3773.8, 21.7546 min, CYP-2_NP	RI=3773.8, 21.7546 min, CYP-2_NP	1.74705	1	0.538325	0.44687	2.1731	0.1691	0.6246
RI=5831.6, 30.3204 min, CYP-2_NP	RI=5831.6, 30.3204 min, CYP-2_NP	1.19425	1	1.05313	0.420221	2.2911	0.15504	0.6246
RI=1427.6, 6.5505 min, WT-2_P	RI=1427.6, 6.5505 min, WT-2_P	0.546093	1	0.650426	0.343777	2.1419	0.17308	0.62737
RI=2201.3, 13.1582 min, CYP-2_P	RI=2201.3, 13.1582 min, CYP-2_P	1.03834	1	0.942221	1.22666	2.1189	0.17608	0.62737
RI=2914.8, 17.6004 min, CYP-2_NP	RI=2914.8, 17.6004 min, CYP-2_NP	1.26491	1	1.26478	0.932438	2.124	0.1754	0.62737
RI=2226.5, 13.3306 min, CYP-2_P	RI=2226.5, 13.3306 min, CYP-2_P	1.53471	1	1.2543	1.0811	2.0936	0.17945	0.63326
RI=2382.9, 14.4019 min, CYP-2_P	RI=2382.9, 14.4019 min, CYP-2_P	1.16363	1	0.602367	0.810522	2.053	0.18505	0.64679
Decanedioic acid, dibutyl ester	Decanedioic acid, dibutyl ester	0.839496	1	1.04839	0.891817	1.986	0.19474	0.65425
RI=1834.1, 10.3097 min, WT-2_P	RI=1834.1, 10.3097 min, WT-2_P	0.726484	1	0.610114	0.659625	1.9834	0.19512	0.65425
RI=2793.1, 16.9276 min, CYP-2_P	RI=2793.1, 16.9276 min, CYP-2_P	1.08736	1	0.981764	1.33375	2.0181	0.19001	0.65425
RI=3077.9, 18.4729 min, CYP-2_P	RI=3077.9, 18.4729 min, CYP-2_P	0.811507	1	0.645479	0.638904	1.9815	0.19541	0.65425
15-Tetracosenoic acid	15-Tetracosenoic acid, Z-, TMS derivative	0.586493	1	1.46564	0.944905	1.8697	0.21306	0.66341
n/a	3-Methyl-1-cyclohexanecarboxylic acid, tert.-butyldimethylsilyl ester stereoisomer 2	0.854352	1	1.18472	1.03375	1.9288	0.2035	0.66341
RI=1826.9, 10.2511 min, CYP-2_P	RI=1826.9, 10.2511 min, CYP-2_P	1.04229	1	0.957836	0.745437	1.8725	0.21259	0.66341
RI=2289.5, 13.7622 min, CYP-2_NP	RI=2289.5, 13.7622 min, CYP-2_NP	1.01008	1	1.20316	0.740461	1.8845	0.21061	0.66341
RI=2981.1, 17.9657 min, CYP-2_P	RI=2981.1, 17.9657 min, CYP-2_P	0.88824	1	0.800092	0.85819	1.8682	0.2133	0.66341
RI=2996.5, 18.0506 min, CYP-2_NP	RI=2996.5, 18.0506 min, CYP-2_NP	2.13904	1	0.651457	0.861271	1.873	0.21251	0.66341
RI=3244.9, 19.3224 min, CYP-2_P	RI=3244.9, 19.3224 min, CYP-2_P	2.53481	1	1.82923	1.73056	1.8775	0.21176	0.66341
RI=1921.7, 11.0233 min, CYP-2_P	RI=1921.7, 11.0233 min, CYP-2_P	0.758805	1	0.488794	0.528282	1.8398	0.21811	0.66793
RI=3407.7, 20.1124 min, CYP-2_NP	RI=3407.7, 20.1124 min, CYP-2_NP	1.01901	1	0.685858	1.18346	1.8381	0.2184	0.66793
RI=1235.0, 4.5405 min, L12-2_P	RI=1235.0, 4.5405 min, L12-2_P	0.945789	1	0.475263	0.704211	1.7986	0.22529	0.67772
RI=2299.3, 13.8293 min, CYP-2_P	RI=2299.3, 13.8293 min, CYP-2_P	1.06323	1	0.729202	1.00784	1.8044	0.22426	0.67772
RI=1554.4, 7.7968 min, CYP-2_NP	RI=1554.4, 7.7968 min, CYP-2_NP	0.816719	1	0.956622	0.84085	1.7677	0.23088	0.68333
RI=1578.5, 8.0338 min, CYP-2_NP	RI=1578.5, 8.0338 min, CYP-2_NP	0.735926	1	1.17298	0.671443	1.7764	0.22928	0.68333
RI=1790.0, 9.9427 min, CYP-2_NP	RI=1790.0, 9.9427 min, CYP-2_NP	1.28164	1	0.809828	0.943995	1.7454	0.235	0.68997
RI=1213.4, 4.3129 min, CYP-2_P	RI=1213.4, 4.3129 min, CYP-2_P	0.727099	1	1.08588	1.06966	1.7324	0.23746	0.69166
D-Mannose-6-phosphate	D-Mannose, 2,3,4,5-tetrakis-O-trimethylsilyl-, O-methyloxime, 6-bistrimethylsilyl phosphate	0.802328	1	1.53948	1.83196	1.715	0.24078	0.69579
RI=2514.6, 15.2463 min, CYP-2_NP	RI=2514.6, 15.2463 min, CYP-2_NP	0.850432	1	1.27845	0.894293	1.6975	0.24419	0.70012
RI=1392.4, 6.1988 min, CYP-2_P	RI=1392.4, 6.1988 min, CYP-2_P	1.19906	1	1.0558	0.936014	1.6779	0.24806	0.70261
RI=3500.7, 20.5397 min, CYP-2_NP	RI=3500.7, 20.5397 min, CYP-2_NP	1.4659	1	0.900062	1.13887	1.6738	0.24888	0.70261
RI=2193.9, 13.1038 min, CYP-2_P	RI=2193.9, 13.1038 min, CYP-2_P	0.545827	1	0.718853	0.951482	1.6615	0.25137	0.70423
RI=2260.6, 13.5643 min, CYP-2_P	RI=2260.6, 13.5643 min, CYP-2_P	0.956107	1	0.633529	1.00543	1.6177	0.26045	0.71869
RI=2343.5, 14.1317 min, CYP-2_P	RI=2343.5, 14.1317 min, CYP-2_P	1.65072	1	1.08199	1.61327	1.6235	0.25923	0.71869
RI=2637.5, 16.0092 min, CYP-2_P	RI=2637.5, 16.0092 min, CYP-2_P	0.761665	1	0.726179	0.846263	1.6029	0.26362	0.72201
Ethanolamine	Ethanolamine, 3TMS derivative	1.09454	1	0.893511	1.01628	1.5716	0.27045	0.72558
L-Histidine	L-Histidine, N,1-bistrimethylsilyl-, trimethylsilyl ester	0.683079	1	0.773588	0.745183	1.5648	0.27196	0.72558
L-Valine	L-Valine, 2TMS derivative	0.977569	1	1.01161	1.15636	1.5609	0.27283	0.72558
RI=2773.3, 16.8103 min, CYP-2_P	RI=2773.3, 16.8103 min, CYP-2_P	1.53123	1	0.728197	0.922102	1.5733	0.27008	0.72558
RI=1449.7, 6.7680 min, CYP-2_P	RI=1449.7, 6.7680 min, CYP-2_P	0.729772	1	0.750336	0.917067	1.5258	0.28083	0.73095
RI=3250.3, 19.3487 min, CYP-2_P	RI=3250.3, 19.3487 min, CYP-2_P	1.38	1	0.881997	1.03635	1.5287	0.28016	0.73095
n/a	Tris2,4-di-tert-butylphenyl phosphate	1.10008	1	1.15179	1.005	1.5285	0.28021	0.73095
RI=1344.1, 5.6899 min, CYP-2_NP	RI=1344.1, 5.6899 min, CYP-2_NP	0.612828	1	0.619938	0.703246	1.4752	0.29286	0.7569
Pentacosanoic acid	Pentacosanoic acid, trimethylsilyl ester	1.3801	1	0.732556	0.515876	1.4445	0.30047	0.75843
RI=1416.6, 6.4417 min, L12-2_NP	RI=1416.6, 6.4417 min, L12-2_NP	0.676127	1	1.02671	0.888147	1.4643	0.29553	0.75843
RI=1532.4, 7.5810 min, L12-2_NP	RI=1532.4, 7.5810 min, L12-2_NP	0.686379	1	0.433035	0.961411	1.4395	0.30172	0.75843
RI=3882.4, 22.2116 min, CYP-2_P	RI=3882.4, 22.2116 min, CYP-2_P	1.02745	1	0.680637	0.611029	1.4548	0.29789	0.75843
RI=1154.9, 3.6970 min, CYP-2_NP	RI=1154.9, 3.6970 min, CYP-2_NP	0.688679	1	1.00943	0.995957	1.3934	0.31361	0.77246
RI=4017.3, 22.7732 min, CYP-2_P	RI=4017.3, 22.7732 min, CYP-2_P	0.787425	1	1.04192	0.888224	1.4005	0.31176	0.77246
RI=4944.1, 26.6283 min, CYP-2_NP	RI=4944.1, 26.6283 min, CYP-2_NP	0.600289	1	0.92628	0.450869	1.3959	0.31296	0.77246
RI=1230.5, 4.4930 min, CYP-2_P	RI=1230.5, 4.4930 min, CYP-2_P	0.876876	1	1.25961	1.13907	1.364	0.32152	0.78145
RI=1406.9, 6.3466 min, CYP-2_NP	RI=1406.9, 6.3466 min, CYP-2_NP	1.10614	1	0.995112	0.736965	1.3676	0.32054	0.78145
RI=1624.6, 8.4645 min, CYP-2_NP	RI=1624.6, 8.4645 min, CYP-2_NP	1.15201	1	1.47363	1.33528	1.3298	0.33098	0.79558
RI=1661.6, 8.7950 min, CYP-2_P	RI=1661.6, 8.7950 min, CYP-2_P	1.11099	1	0.706051	0.760092	1.3273	0.33167	0.79558
RI=1899.6, 10.8432 min, CYP-2_P	RI=1899.6, 10.8432 min, CYP-2_P	0.933666	1	0.785229	0.792107	1.2986	0.3399	0.81003
Scopolin	Scopolin, tetratrimethylsilyl-	1.18535	1	0.846776	0.950347	1.2887	0.3428	0.81165
Decanoic acid	Decanoic acid, trimethylsilyl ester	0.819942	1	1.08583	0.693572	1.267	0.34924	0.81785
RI=1711.7, 9.2427 min, CYP-2_P	RI=1711.7, 9.2427 min, CYP-2_P	0.934319	1	0.973152	0.715192	1.2649	0.34987	0.81785
RI=2162.7, 12.8718 min, L12-2_P	RI=2162.7, 12.8718 min, L12-2_P	0.763274	1	0.88759	0.786873	1.2556	0.35269	0.81922
n/a	1-Cyclohexene-1-carboxylic acid, 3,4,5-tristrimethylsilyloxy-, trimethylsilyl ester, 3R-3.alpha.,4.alpha.,5.beta.-	0.806366	1	0.672909	0.696591	1.2013	0.36962	0.83735
RI=1886.5, 10.7362 min, CYP-2_NP	RI=1886.5, 10.7362 min, CYP-2_NP	1.37327	1	0.971889	1.04839	1.2087	0.36726	0.83735
RI=2390.0, 14.4503 min, CYP-2_P	RI=2390.0, 14.4503 min, CYP-2_P	1.34447	1	0.670877	0.690342	1.2028	0.36913	0.83735
RI=2464.6, 14.9286 min, CYP-2_P	RI=2464.6, 14.9286 min, CYP-2_P	0.708676	1	0.869863	1.10657	1.2179	0.36432	0.83735
RI=1704.8, 9.1815 min, CYP-2_P	RI=1704.8, 9.1815 min, CYP-2_P	1.15556	1	0.970884	1.07533	1.1927	0.37239	0.83845
RI=1794.9, 9.9860 min, CYP-2_P	RI=1794.9, 9.9860 min, CYP-2_P	1.26832	1	0.783195	1.09844	1.1742	0.37842	0.84428
RI=2436.3, 14.7494 min, CYP-2_P	RI=2436.3, 14.7494 min, CYP-2_P	0.831049	1	0.64615	0.891353	1.1707	0.37958	0.84428
RI=3627.8, 21.1174 min, CYP-2_NP	RI=3627.8, 21.1174 min, CYP-2_NP	1.60187	1	1.25376	1.17047	1.1574	0.38398	0.84892
RI=3148.6, 18.8382 min, CYP-2_P	RI=3148.6, 18.8382 min, CYP-2_P	1.01826	1	1.3618	1.02575	1.1466	0.38762	0.85183
RI=1709.8, 9.2257 min, CYP-2_NP	RI=1709.8, 9.2257 min, CYP-2_NP	1.4406	1	0.906915	1.17021	1.1289	0.39368	0.85492
RI=3542.3, 20.7309 min, CYP-2_NP	RI=3542.3, 20.7309 min, CYP-2_NP	0.996525	1	1.37533	1.71242	1.1341	0.39189	0.85492
D-Ribofuranose	D---Ribofuranose, tetrakistrimethylsilyl ether isomer 2	1.65348	1	1.37033	0.648514	1.1148	0.39855	0.8604
RI=2145.3, 12.7419 min, CYP-2_P	RI=2145.3, 12.7419 min, CYP-2_P	1.00303	1	0.72697	0.769545	1.1035	0.40252	0.8639
1-Triacontanol	Silane, dotriacontyloxytrimethyl-	1.01038	1	1.00299	1.22591	1.0792	0.41124	0.87746
Phosphate	Silanol, trimethyl-, phosphate 3:1	0.906353	1	1.06088	0.864919	1.0608	0.41797	0.88669
1-Monolinolein	1-Monolinolein, 2TMS derivative	1.5727	1	1.03684	1.49735	0.8946	0.48469	0.89098
Threonic acid	2,3,4-Trihydroxybutyric acid tetrakistrimethylsilyl deriv., , R*,R*-	1.16239	1	0.887126	0.992933	0.98433	0.4473	0.89098
n/a	2-8Z,11Z-Heptadeca-8,11-dien-1-yl-4,5-dihydrooxazole	1.41579	1	1.09079	1.49474	0.64727	0.6063	0.89098
3-Hydroxy-tyrosine	3-Hydroxy-tyrosine, 4TMS derivative	0.9927	1	0.708894	0.880544	0.68189	0.58754	0.89098
9,12-Octadecadienoic acid	9,12-Octadecadienoic acid Z,Z-, TMS - like 2	1.01887	1	1.13391	1.00264	0.85993	0.50005	0.89098
Adenosine	Adenosine, 4TMS derivative	0.414269	1	0.486678	0.39857	0.75559	0.54953	0.89098
Ascorbic acid	Ascorbic acid, 4TMS derivative	1.23171	1	1.03934	0.97603	0.68199	0.58748	0.89098
b-Alanine	b-Alanine, 3TMS derivative	0.866351	1	0.857481	0.897102	0.69015	0.58315	0.89098
Docosanol	Docosanol, TMS derivative	1.54011	1	1.29087	1.42668	0.8081	0.524	0.89098
n/a	Erythrono-1,4-lactone, E-, 2TMS derivative	0.992093	1	0.813023	0.925581	0.74325	0.55571	0.89098
Glutamine	Glutamine	0.865259	1	0.834273	0.766681	0.77499	0.53995	0.89098
HC Like1	HC Like1	1.15394	1	1.06243	1.04909	0.6486	0.60557	0.89098
HC-Like3	HC-Like3	0.911093	1	0.996103	1.01784	0.76163	0.54652	0.89098
HC-Like4	HC-Like4	1.10768	1	1.01775	1.22936	0.87781	0.49206	0.89098
Heptadecanoic acid	Heptadecanoic acid, TMS Like	0.843943	1	0.966119	0.880903	0.71077	0.57233	0.89098
Lignoceric acid	Lignoceric acid, TMS derivative	1.04992	1	1.19769	1.24368	0.72641	0.56426	0.89098
Nonanoic acid	Nonanoic acid, TMS derivative	0.860941	1	1.01977	0.935242	0.65227	0.60356	0.89098
Oleic acid	Oleic acid, trimethylsilyl ester	0.993788	1	1.30571	0.947182	0.91721	0.47495	0.89098
Phytol	Phytol, TMS derivative	0.879445	1	0.896591	0.868965	0.66598	0.59609	0.89098
Putrescine	Putrescine, 4TMS derivative	0.805153	1	0.0368105	0.0436486	0.69203	0.58216	0.89098
Pyroglutamic acid	Pyroglutamic acid, TMS derivative	1.06453	1	0.949822	0.870102	0.74853	0.55305	0.89098
RI=1191.4, 4.0809 min, CYP-2_P	RI=1191.4, 4.0809 min, CYP-2_P	1.21345	1	1.14796	0.853221	0.91534	0.47575	0.89098
RI=1197.3, 4.1438 min, CYP-2_P	RI=1197.3, 4.1438 min, CYP-2_P	0.780924	1	0.997317	0.630999	0.68157	0.58771	0.89098
RI=1218.4, 4.3655 min, CYP-2_NP	RI=1218.4, 4.3655 min, CYP-2_NP	0.86294	1	0.898706	0.749234	0.72259	0.56623	0.89098
RI=1256.0, 4.7614 min, CYP-2_P	RI=1256.0, 4.7614 min, CYP-2_P	0.575029	1	0.365741	0.57359	1.0058	0.43884	0.89098
RI=1303.8, 5.2660 min, CYP-2_NP	RI=1303.8, 5.2660 min, CYP-2_NP	0.838983	1	0.696731	0.685137	0.89054	0.48646	0.89098
RI=1320.3, 5.4393 min, CYP-2_NP	RI=1320.3, 5.4393 min, CYP-2_NP	0.875622	1	0.903814	0.986733	0.66781	0.5951	0.89098
RI=1341.6, 5.6635 min, L12-2_P	RI=1341.6, 5.6635 min, L12-2_P	0.823613	1	0.731863	0.907752	0.69476	0.58071	0.89098
RI=1349.5, 5.7469 min, CYP-2_NP	RI=1349.5, 5.7469 min, CYP-2_NP	1.07957	1	1.17982	0.575815	0.81143	0.52243	0.89098
RI=1369.2, 5.9550 min, CYP-2_P	RI=1369.2, 5.9550 min, CYP-2_P	1.43226	1	1.28443	1.90868	0.96737	0.45411	0.89098
RI=1430.8, 6.5819 min, CYP-2_NP	RI=1430.8, 6.5819 min, CYP-2_NP	0.980228	1	0.819652	0.940683	0.92695	0.47082	0.89098
RI=1459.5, 6.8640 min, CYP-2_NP	RI=1459.5, 6.8640 min, CYP-2_NP	1.70494	1	1.14997	1.07744	0.81612	0.52022	0.89098
RI=1469.7, 6.9642 min, CYP-2_NP	RI=1469.7, 6.9642 min, CYP-2_NP	0.848705	1	0.823834	0.916753	0.71955	0.56779	0.89098
RI=1529.5, 7.5521 min, CYP-2_P	RI=1529.5, 7.5521 min, CYP-2_P	1.19117	1	0.781598	0.82345	0.9279	0.47042	0.89098
RI=1544.1, 7.6957 min, CYP-2_P	RI=1544.1, 7.6957 min, CYP-2_P	0.958925	1	0.835698	1.06871	0.65848	0.60016	0.89098
RI=1563.7, 7.8877 min, CYP-2_NP	RI=1563.7, 7.8877 min, CYP-2_NP	0.791633	1	0.990346	1.14401	0.67091	0.59343	0.89098
RI=1570.6, 7.9556 min, CYP-2_NP	RI=1570.6, 7.9556 min, CYP-2_NP	1.76029	1	0.990994	1.16546	0.79345	0.53099	0.89098
RI=1601.3, 8.2564 min, CYP-2_NP	RI=1601.3, 8.2564 min, CYP-2_NP	0.323917	1	0.718859	0.860192	0.75951	0.54758	0.89098
RI=1614.8, 8.3770 min, CYP-2_NP	RI=1614.8, 8.3770 min, CYP-2_NP	1.36373	1	1.48958	1.54529	0.81114	0.52257	0.89098
RI=1631.6, 8.5274 min, CYP-2_P	RI=1631.6, 8.5274 min, CYP-2_P	0.764402	1	0.723476	0.689427	0.74902	0.55281	0.89098
RI=1656.4, 8.7491 min, CYP-2_NP	RI=1656.4, 8.7491 min, CYP-2_NP	0.906028	1	1.20479	1.09043	0.84901	0.50499	0.89098
RI=1749.2, 9.5783 min, CYP-2_P	RI=1749.2, 9.5783 min, CYP-2_P	1.17804	1	0.857601	0.741074	1.0272	0.43058	0.89098
RI=1815.6, 10.1593 min, CYP-2_NP	RI=1815.6, 10.1593 min, CYP-2_NP	2.11927	1	1.97844	3.5789	0.74515	0.55475	0.89098
RI=1909.9, 10.9273 min, CYP-2_NP	RI=1909.9, 10.9273 min, CYP-2_NP	0.810232	1	0.84787	1.04462	0.76885	0.54296	0.89098
RI=1915.5, 10.9731 min, L12-2_P	RI=1915.5, 10.9731 min, L12-2_P	0.769688	1	0.953542	0.677075	0.98841	0.44567	0.89098
RI=1921.5, 11.0216 min, CYP-2_NP	RI=1921.5, 11.0216 min, CYP-2_NP	0.828834	1	1.23926	0.989571	0.94207	0.46449	0.89098
RI=2007.6, 11.7174 min, CYP-2_NP	RI=2007.6, 11.7174 min, CYP-2_NP	1.07314	1	1.26392	1.12415	0.95722	0.45824	0.89098
RI=2013.6, 11.7624 min, CYP-2_NP	RI=2013.6, 11.7624 min, CYP-2_NP	0.705817	1	1.27629	0.951902	0.92049	0.47355	0.89098
RI=2029.4, 11.8796 min, CYP-2_NP	RI=2029.4, 11.8796 min, CYP-2_NP	1.25421	1	0.891271	0.833078	0.88419	0.48925	0.89098
RI=2090.6, 12.3350 min, CYP-2_NP	RI=2090.6, 12.3350 min, CYP-2_NP	1	1	1.12421	0.881754	0.65258	0.60339	0.89098
RI=2130.2, 12.6298 min, CYP-2_P	RI=2130.2, 12.6298 min, CYP-2_P	0.965919	1	0.811793	0.830797	0.73785	0.55844	0.89098
RI=2143.9, 12.7317 min, CYP-2_NP	RI=2143.9, 12.7317 min, CYP-2_NP	1.05414	1	1.40752	1.05113	0.93525	0.46733	0.89098
RI=2167.3, 12.9058 min, CYP-2_NP	RI=2167.3, 12.9058 min, CYP-2_NP	0.762955	1	1.10946	0.935865	0.64436	0.60791	0.89098
RI=2187.5, 13.0563 min, CYP-2_P	RI=2187.5, 13.0563 min, CYP-2_P	0.866197	1	0.759557	0.542254	0.63992	0.61036	0.89098
RI=2214.9, 13.2508 min, CYP-2_NP	RI=2214.9, 13.2508 min, CYP-2_NP	1.39953	1	1.32146	1.27773	0.71299	0.57118	0.89098
RI=2263.5, 13.5838 min, WT-2_NP	RI=2263.5, 13.5838 min, WT-2_NP	1.06664	1	1.07215	0.791078	0.82255	0.5172	0.89098
RI=2278.2, 13.6849 min, CYP-2_P	RI=2278.2, 13.6849 min, CYP-2_P	0.735422	1	0.912665	0.764512	0.70642	0.5746	0.89098
RI=2320.6, 13.9754 min, CYP-2_P	RI=2320.6, 13.9754 min, CYP-2_P	0.562544	1	1.20774	1.35243	1.0189	0.43374	0.89098
RI=2414.2, 14.6092 min, CYP-2_NP	RI=2414.2, 14.6092 min, CYP-2_NP	0.951616	1	4.11394	1.20856	0.89851	0.48299	0.89098
RI=2449.3, 14.8317 min, L12-2_P	RI=2449.3, 14.8317 min, L12-2_P	0.921061	1	1.07378	1.22133	0.63734	0.61179	0.89098
RI=2485.3, 15.0603 min, CYP-2_NP	RI=2485.3, 15.0603 min, CYP-2_NP	1.25041	1	1.16804	1.10873	0.92181	0.47299	0.89098
RI=2524.0, 15.3058 min, CYP-2_NP	RI=2524.0, 15.3058 min, CYP-2_NP	0.697496	1	0.935579	0.914194	0.66297	0.59772	0.89098
RI=2573.7, 15.6210 min, CYP-2_P	RI=2573.7, 15.6210 min, CYP-2_P	1.02836	1	0.852375	0.887905	0.82612	0.51554	0.89098
RI=2764.2, 16.7568 min, CYP-2_P	RI=2764.2, 16.7568 min, CYP-2_P	0.848221	1	0.665613	0.780237	0.71267	0.57135	0.89098
RI=2825.2, 17.1068 min, CYP-2_P	RI=2825.2, 17.1068 min, CYP-2_P	0.530064	1	1.20059	1.0003	0.74287	0.5559	0.89098
RI=2887.0, 17.4475 min, CYP-2_P	RI=2887.0, 17.4475 min, CYP-2_P	0.938261	1	0.770468	0.986071	1.0068	0.43845	0.89098
RI=2915.1, 17.6020 min, WT-2_P	RI=2915.1, 17.6020 min, WT-2_P	0.801175	1	0.947166	0.867961	0.80493	0.52551	0.89098
RI=2931.9, 17.6947 min, CYP-2_P	RI=2931.9, 17.6947 min, CYP-2_P	1.58168	1	1.42254	1.04225	0.70272	0.57653	0.89098
RI=2954.7, 17.8203 min, L12-2_P	RI=2954.7, 17.8203 min, L12-2_P	1.09682	1	1.0919	0.848951	0.7615	0.54659	0.89098
RI=3063.5, 18.3981 min, WT-2_P	RI=3063.5, 18.3981 min, WT-2_P	0.840335	1	0.714787	1.46173	0.85081	0.50418	0.89098
RI=3148.1, 18.8356 min, CYP-2_NP	RI=3148.1, 18.8356 min, CYP-2_NP	1.14021	1	0.951027	1.45419	0.85148	0.50387	0.89098
RI=3344.9, 19.8091 min, CYP-2_NP	RI=3344.9, 19.8091 min, CYP-2_NP	1.02968	1	0.876151	1.27226	0.93777	0.46628	0.89098
RI=3575.2, 20.8821 min, CYP-2_NP	RI=3575.2, 20.8821 min, CYP-2_NP	1.29992	1	1.20646	1.39082	0.93202	0.46869	0.89098
RI=3825.6, 21.9754 min, L12-2_NP	RI=3825.6, 21.9754 min, L12-2_NP	1.71521	1	1.48518	0.523611	0.9299	0.46958	0.89098
RI=4299.6, 23.9472 min, CYP-2_NP	RI=4299.6, 23.9472 min, CYP-2_NP	1.63564	1	1.51466	0.77664	0.6957	0.58022	0.89098
RI=4323.5, 24.0466 min, CYP-2_NP	RI=4323.5, 24.0466 min, CYP-2_NP	0.97575	1	0.983754	1.69988	1.0009	0.44076	0.89098
Sulfuric acid	Sulfuric acid, 2TMS derivative	0.667444	1	0.728019	0.624853	0.65566	0.6017	0.89098
Triethylene glycol	Triethylene glycol, 2TMS derivative	0.867101	1	0.921869	0.817311	0.74655	0.55405	0.89098
Octacosanoate	Trimethylsilyl octacosanoate	1.02414	1	0.984884	1.21444	0.74576	0.55445	0.89098
.beta.-D-Glucopyranose	.beta.-D-Glucopyranose, 5TMS derivative	0.235053	1	0.397952	0.0517696	0.63152	0.61503	0.89216
n/a	Pentanenitrile, 5-methylthio-	1.064	1	0.667862	0.83089	0.61918	0.62195	0.89513
RI=1193.9, 4.1073 min, CYP-2_NP	RI=1193.9, 4.1073 min, CYP-2_NP	1.14373	1	0.869831	0.928136	0.62134	0.62074	0.89513
RI=1595.5, 8.2012 min, CYP-2_P	RI=1595.5, 8.2012 min, CYP-2_P	1.34308	1	1.49255	1.64927	0.6097	0.62733	0.89721
RI=2742.6, 16.6294 min, CYP-2_NP	RI=2742.6, 16.6294 min, CYP-2_NP	3.45673	1	1.86458	1.39535	0.60714	0.62878	0.89721
RI=2982.8, 17.9750 min, CYP-2_NP	RI=2982.8, 17.9750 min, CYP-2_NP	1.01168	1	0.984672	1.4073	0.60372	0.63074	0.89721
1-Linolenoylglycerol	1-Linolenoylglycerol, 2TMS derivative	0.995361	1	1.4937	1.34201	0.57549	0.64707	0.89962
Raffinose	Raffinose TMS	1.2352	1	0.782726	1.19177	0.57457	0.64761	0.89962
RI=1799.9, 10.0311 min, CYP-2_P	RI=1799.9, 10.0311 min, CYP-2_P	0.982023	1	0.864211	0.872923	0.59	0.63863	0.89962
RI=1886.5, 10.7362 min, CYP-2_P	RI=1886.5, 10.7362 min, CYP-2_P	1.31624	1	1.15261	1.46591	0.57924	0.64488	0.89962
RI=3055.2, 18.3556 min, WT-2_NP	RI=3055.2, 18.3556 min, WT-2_NP	1.06975	1	0.890015	1.28341	0.58971	0.63879	0.89962
RI=3125.9, 18.7209 min, CYP-2_P	RI=3125.9, 18.7209 min, CYP-2_P	1.06429	1	0.930822	0.975086	0.57234	0.64892	0.89962
Sinapinic acid	Sinapinic acid, 2TMS derivative	0.899256	1	0.925063	0.864707	0.57119	0.64959	0.89962
n/a	3,5,5-Trimethylhexanoic acid trimethylsilyl ester	0.794285	1	0.859186	0.702736	0.56514	0.65315	0.90116
D-Gluconic acid	D-Gluconic acid, 6TMS derivative	1.07356	1	0.992409	1.02301	0.5497	0.66233	0.91039
RI=1187.7, 4.0427 min, CYP-2_NP	RI=1187.7, 4.0427 min, CYP-2_NP	0.685225	1	0.804997	0.845464	0.53874	0.66891	0.91083
RI=1670.5, 8.8748 min, CYP-2_NP	RI=1670.5, 8.8748 min, CYP-2_NP	1.26827	1	1.11293	0.793466	0.53678	0.67009	0.91083
RI=1762.5, 9.6972 min, CYP-2_P	RI=1762.5, 9.6972 min, CYP-2_P	1.04645	1	1.11749	1.20902	0.54304	0.66632	0.91083
1,2-Dipalmitin	1,2-Dipalmitin, TMS derivative - Like	0.958981	1	1.05835	1.22512	0.45214	0.72287	0.9156
1-Octadecanol	1-Octadecanol, TMS derivative	0.763411	1	0.973865	0.859697	0.4585	0.71879	0.9156
n/a	3,7,11,15-Tetramethylhexadec-2-ene	1.09874	1	0.965546	1.01483	0.48697	0.70076	0.9156
Glycerol	Glycerol, 3TMS derivative	0.893971	1	1.00736	0.934017	0.48975	0.69901	0.9156
Hexacosanoic acid	Hexacosanoic acid, TMS derivative	1.08816	1	1.01012	1.15384	0.50415	0.69005	0.9156
Isoleucine	Isoleucine	0.950888	1	0.881019	1.01883	0.48486	0.70208	0.9156
Lysine	Lysine	0.889916	1	0.844096	0.946982	0.44124	0.72989	0.9156
Neophytadiene	Neophytadiene	1.13277	1	1.04913	1.04632	0.42875	0.738	0.9156
RI=1202.2, 4.1948 min, CYP-2_NP	RI=1202.2, 4.1948 min, CYP-2_NP	0.94442	1	1.16047	1.17078	0.46514	0.71455	0.9156
RI=1338.0, 5.6262 min, CYP-2_NP	RI=1338.0, 5.6262 min, CYP-2_NP	1.21488	1	1.07433	1.17865	0.47918	0.70565	0.9156
RI=1519.1, 7.4502 min, CYP-2_P	RI=1519.1, 7.4502 min, CYP-2_P	1.03633	1	1.62254	1.45259	0.49278	0.69712	0.9156
RI=1580.3, 8.0517 min, CYP-2_P	RI=1580.3, 8.0517 min, CYP-2_P	1.15981	1	0.984366	1.22003	0.48544	0.70172	0.9156
RI=1815.1, 10.1552 min, WT-2_NP	RI=1815.1, 10.1552 min, WT-2_NP	0.79912	1	0.731893	0.85114	0.42937	0.7376	0.9156
RI=1858.8, 10.5110 min, CYP-2_NP	RI=1858.8, 10.5110 min, CYP-2_NP	1.32043	1	1.24229	1.59246	0.46186	0.71664	0.9156
RI=2003.7, 11.6885 min, CYP-2_P	RI=2003.7, 11.6885 min, CYP-2_P	1.39775	1	1.28537	1.71217	0.4509	0.72367	0.9156
RI=2012.6, 11.7548 min, CYP-2_P	RI=2012.6, 11.7548 min, CYP-2_P	1.14032	1	0.647106	0.576048	0.48815	0.70002	0.9156
RI=2247.3, 13.4733 min, CYP-2_NP	RI=2247.3, 13.4733 min, CYP-2_NP	0.935135	1	0.986173	1.07226	0.42804	0.73846	0.9156
RI=2261.9, 13.5727 min, CYP-2_NP	RI=2261.9, 13.5727 min, CYP-2_NP	0.88363	1	0.912573	0.749979	0.4288	0.73797	0.9156
RI=2676.5, 16.2394 min, CYP-2_P	RI=2676.5, 16.2394 min, CYP-2_P	1.26247	1	0.829928	1.13456	0.47234	0.70998	0.9156
RI=2966.9, 17.8875 min, CYP-2_P	RI=2966.9, 17.8875 min, CYP-2_P	0.795	1	0.978947	1.08289	0.50458	0.68979	0.9156
RI=2996.5, 18.0506 min, L12-2_NP	RI=2996.5, 18.0506 min, L12-2_NP	1.02549	1	1.83442	1.37662	0.43004	0.73716	0.9156
RI=3025.7, 18.2027 min, CYP-2_NP	RI=3025.7, 18.2027 min, CYP-2_NP	1.14771	1	1.61668	1.35526	0.51266	0.6848	0.9156
RI=3558.0, 20.8031 min, CYP-2_P	RI=3558.0, 20.8031 min, CYP-2_P	0.785168	1	1.64281	1.35245	0.44054	0.73035	0.9156
RI=3863.2, 22.1317 min, CYP-2_NP	RI=3863.2, 22.1317 min, CYP-2_NP	1.19595	1	0.941667	1.27477	0.47766	0.70662	0.9156
Triacontanoate	Trimethylsilyl triacontanoate	1.14273	1	1.12431	1.22315	0.4353	0.73374	0.9156
Alpha-Tocopherol	.alpha.-Tocopherol, TMS derivative	0.907404	1	0.959076	0.989921	0.36484	0.78042	0.92726
1-Monopalmitin	1-Monopalmitin, 2TMS derivative	0.866928	1	0.992102	1.13474	0.36693	0.77901	0.92726
n/a	1-Palmitoyloxy-3-trimethylsilyloxypropan-2-yl Z-hexadec-9-enoate - Like	1.04762	1	1.0121	1.21248	0.30681	0.81999	0.92726
Benzoic Acid	Benzoic Acid, TMS derivative	1.0286	1	0.935927	0.966819	0.29592	0.82749	0.92726
Campesteryl glucoside	Campesteryl glucoside	1.20525	1	1.10258	1.36081	0.32774	0.80563	0.92726
Cycloartenol	Cycloartenol Like, TMS	0.807107	1	0.822335	0.939932	0.30165	0.82354	0.92726
Docosanoic acid	Docosanoic acid, TMS ester	1.0087	1	1.18318	1.17641	0.38822	0.76474	0.92726
Enanthic acid	enanthic acid trimethylsilyl ester	0.970522	1	1.23396	1.09925	0.31396	0.81508	0.92726
Hexadecanoic acid	Hexadecanoic acid, trimethylsilyl ester	0.945906	1	1.1054	1.04436	0.35073	0.78996	0.92726
Glycerol-3-phosphate	Phosphoric acid, bistrimethylsilyl 2,3-bistrimethylsilyloxypropyl ester	1.21758	1	1.22681	1.24757	0.28315	0.8363	0.92726
Proline	Proline	0.796341	1	0.911086	0.996654	0.28671	0.83385	0.92726
RI=1163.1, 3.7836 min, CYP-2_NP	RI=1163.1, 3.7836 min, CYP-2_NP	0.916318	1	1.0429	0.99719	0.39401	0.76088	0.92726
RI=1167.9, 3.8337 min, CYP-2_NP	RI=1167.9, 3.8337 min, CYP-2_NP	0.981423	1	1.12981	1.02086	0.30745	0.81955	0.92726
RI=1428.1, 6.5556 min, CYP-2_NP	RI=1428.1, 6.5556 min, CYP-2_NP	1.2441	1	1.24864	1.41742	0.31043	0.8175	0.92726
RI=1480.1, 7.0662 min, CYP-2_NP	RI=1480.1, 7.0662 min, CYP-2_NP	0.900311	1	0.968743	0.853398	0.36812	0.77821	0.92726
RI=1505.1, 7.3125 min, CYP-2_NP	RI=1505.1, 7.3125 min, CYP-2_NP	1.5169	1	1.26783	1.09262	0.38686	0.76564	0.92726
RI=1568.1, 7.9311 min, L12-2_NP	RI=1568.1, 7.9311 min, L12-2_NP	0.80794	1	0.969434	0.877551	0.36434	0.78076	0.92726
RI=1600.6, 8.2504 min, CYP-2_P	RI=1600.6, 8.2504 min, CYP-2_P	1.16028	1	0.998966	1.24226	0.36142	0.78273	0.92726
RI=1686.6, 9.0184 min, CYP-2_P	RI=1686.6, 9.0184 min, CYP-2_P	1.10706	1	1.25973	1.29979	0.33095	0.80344	0.92726
RI=1715.1, 9.2733 min, CYP-2_P	RI=1715.1, 9.2733 min, CYP-2_P	0.773353	1	1.05074	1.08912	0.38489	0.76696	0.92726
RI=1809.1, 10.1058 min, CYP-2_P	RI=1809.1, 10.1058 min, CYP-2_P	1.0058	1	0.815809	0.883249	0.3051	0.82117	0.92726
RI=1841.0, 10.3658 min, CYP-2_P	RI=1841.0, 10.3658 min, CYP-2_P	1.11786	1	0.950276	0.869245	0.29993	0.82473	0.92726
RI=2003.5, 11.6868 min, CYP-2_NP	RI=2003.5, 11.6868 min, CYP-2_NP	1.2354	1	1.01477	1.0911	0.2892	0.83213	0.92726
RI=2016.3, 11.7819 min, WT-2_P	RI=2016.3, 11.7819 min, WT-2_P	1.25324	1	1.36185	0.980118	0.34748	0.79217	0.92726
RI=2060.7, 12.1124 min, WT-2_P	RI=2060.7, 12.1124 min, WT-2_P	0.745725	1	0.87865	0.531846	0.2956	0.82771	0.92726
RI=2140.6, 12.7071 min, CYP-2_NP	RI=2140.6, 12.7071 min, CYP-2_NP	0.828249	1	0.910734	0.935593	0.32485	0.80761	0.92726
RI=2650.3, 16.0848 min, CYP-2_P	RI=2650.3, 16.0848 min, CYP-2_P	0.853042	1	0.762342	0.797933	0.40662	0.75252	0.92726
RI=2731.1, 16.5614 min, CYP-2_P	RI=2731.1, 16.5614 min, CYP-2_P	0.902736	1	1.21884	1.01311	0.29606	0.8274	0.92726
RI=2877.6, 17.3957 min, CYP-2_P	RI=2877.6, 17.3957 min, CYP-2_P	0.945666	1	0.909996	1.09083	0.34947	0.79082	0.92726
RI=2991.4, 18.0226 min, CYP-2_NP	RI=2991.4, 18.0226 min, CYP-2_NP	1.03094	1	1.16473	1.25715	0.29358	0.82911	0.92726
RI=3025.5, 18.2018 min, L12-2_P	RI=3025.5, 18.2018 min, L12-2_P	0.742639	1	0.750928	0.709691	0.36926	0.77744	0.92726
RI=3813.3, 21.9245 min, CYP-2_NP	RI=3813.3, 21.9245 min, CYP-2_NP	1.54262	1	1.24596	1.06394	0.31671	0.81319	0.92726
Serine	Serine	1.03582	1	1.05011	1.00726	0.38698	0.76557	0.92726
Sucrose	Sucrose, 8TMS derivative	1.03081	1	1.04054	1.27975	0.30936	0.81823	0.92726
RI=1677.3, 8.9360 min, CYP-2_P	RI=1677.3, 8.9360 min, CYP-2_P	0.782909	1	1.08714	0.817536	0.2704	0.84511	0.92891
RI=2295.1, 13.8004 min, CYP-2_NP	RI=2295.1, 13.8004 min, CYP-2_NP	1.01957	1	1.11546	1.06067	0.27051	0.84503	0.92891
RI=2764.3, 16.7576 min, CYP-2_NP	RI=2764.3, 16.7576 min, CYP-2_NP	0.949832	1	0.870314	1.10768	0.27001	0.84538	0.92891
RI=1618.0, 8.4059 min, CYP-2_P	RI=1618.0, 8.4059 min, CYP-2_P	0.965519	1	0.961997	0.880712	0.26587	0.84824	0.92926
RI=1753.5, 9.6165 min, CYP-2_P	RI=1753.5, 9.6165 min, CYP-2_P	1.03554	1	1.10339	0.983306	0.25983	0.85241	0.93062
RI=2097.3, 12.3851 min, CYP-2_P	RI=2097.3, 12.3851 min, CYP-2_P	1.07882	1	1.17833	1.09458	0.25675	0.85454	0.93062
RI=3481.1, 20.4497 min, CYP-2_NP	RI=3481.1, 20.4497 min, CYP-2_NP	1.22551	1	0.973955	1.16359	0.24936	0.85964	0.9334
Linolenic acid	Linolenic acid-like	1.00468	1	0.927557	0.962676	0.19584	0.89633	0.94578
Myo-inositol	Myo-inositol	1.0285	1	1.09075	1.06105	0.19858	0.89448	0.94578
n/a	Phosphoric acid, 1-trimethylsilyloxymethyl-1,2-ethanediyl tetrakistrimethylsilyl ester	1.33626	1	1.11784	1.32161	0.19374	0.89776	0.94578
Phosphorylethanolamine	Phosphorylethanolamine, 4TMS derivative	1.1753	1	1.30825	1.11516	0.21288	0.88473	0.94578
RI=1335.4, 5.5982 min, CYP-2_P	RI=1335.4, 5.5982 min, CYP-2_P	1.25596	1	1.02308	1.00346	0.211	0.88602	0.94578
RI=1442.0, 6.6916 min, CYP-2_P	RI=1442.0, 6.6916 min, CYP-2_P	0.767722	1	0.933807	0.834087	0.22019	0.87972	0.94578
RI=1756.1, 9.6394 min, CYP-2_NP	RI=1756.1, 9.6394 min, CYP-2_NP	0.921663	1	0.936654	0.926015	0.21019	0.88657	0.94578
RI=1982.6, 11.5194 min, CYP-2_NP	RI=1982.6, 11.5194 min, CYP-2_NP	1.04709	1	1.00653	1.15137	0.21814	0.88113	0.94578
RI=2703.7, 16.4000 min, CYP-2_NP	RI=2703.7, 16.4000 min, CYP-2_NP	0.968811	1	0.919259	1.13141	0.19132	0.89939	0.94578
RI=2815.5, 17.0533 min, CYP-2_P	RI=2815.5, 17.0533 min, CYP-2_P	1.14677	1	1.08379	1.046	0.20136	0.89259	0.94578
RI=3672.2, 21.3111 min, CYP-2_NP	RI=3672.2, 21.3111 min, CYP-2_NP	0.835913	1	1.05911	0.89931	0.21666	0.88215	0.94578
3-Amino-2-piperidone	3-Amino-2-piperidone, 2TMS derivative	1.11172	1	0.966722	1.12911	0.16378	0.91778	0.94688
n/a	4-bistrimethylsilylamino-4-keto-2-trimethylsilylaminobutyric acid trimethylsilyl ester	1.05494	1	0.907266	1.03795	0.15559	0.92316	0.94688
Cholesterol	Cholesterol, TMS derivative	0.883467	1	0.886912	0.876579	0.15381	0.92432	0.94688
RI=1559.7, 7.8486 min, CYP-2_NP	RI=1559.7, 7.8486 min, CYP-2_NP	0.915988	1	1.02037	1.09725	0.16857	0.91461	0.94688
RI=1566.5, 7.9157 min, CYP-2_P	RI=1566.5, 7.9157 min, CYP-2_P	1.1568	1	1.02036	1.0688	0.17269	0.91188	0.94688
RI=2023.8, 11.8379 min, L12-2_P	RI=2023.8, 11.8379 min, L12-2_P	1.09862	1	0.989619	0.874567	0.16622	0.91617	0.94688
RI=2179.4, 12.9959 min, CYP-2_P	RI=2179.4, 12.9959 min, CYP-2_P	0.953963	1	0.988166	1.04118	0.18221	0.90553	0.94688
RI=2355.6, 14.2150 min, CYP-2_NP	RI=2355.6, 14.2150 min, CYP-2_NP	0.973151	1	1.00274	1.03836	0.16616	0.91621	0.94688
RI=2376.8, 14.3602 min, CYP-2_NP	RI=2376.8, 14.3602 min, CYP-2_NP	0.955637	1	0.96178	1.11262	0.16255	0.91859	0.94688
RI=2460.3, 14.9014 min, CYP-2_NP	RI=2460.3, 14.9014 min, CYP-2_NP	0.996333	1	1.07824	1.02323	0.15086	0.92624	0.94688
Glycerol monostearate	Glycerol monostearate, 2TMS derivative	0.639998	1	0.975371	0.78847	0.14145	0.9323	0.95043
RI=2039.8, 11.9569 min, CYP-2_P	RI=2039.8, 11.9569 min, CYP-2_P	0.992259	1	1.07063	1.12972	0.12047	0.94547	0.96119
RI=1493.0, 7.1928 min, CYP-2_P	RI=1493.0, 7.1928 min, CYP-2_P	0.882759	1	0.977318	0.864109	0.085875	0.96582	0.97916
Niacin	Niacin, TMS derivative	1.03387	1	1.05484	1.02258	0.066391	0.97622	0.98698
RI=1449.2, 6.7629 min, CYP-2_NP	RI=1449.2, 6.7629 min, CYP-2_NP	1.07974	1	1.02044	1.04749	0.051892	0.98328	0.99138
RI=1823.8, 10.2256 min, CYP-2_P	RI=1823.8, 10.2256 min, CYP-2_P	1.00712	1	1.0525	0.954426	0.045552	0.98614	0.99155
RI=1913.7, 10.9579 min, CYP-2_NP	RI=1913.7, 10.9579 min, CYP-2_NP	1.11057	1	0.920293	1.01275	0.023129	0.99485	0.99757
n/a	Carbamic acid,trimethylsilyltrimethylsilyloxy trimethylsilyl ester	1.03312	1	0.991846	0.987924	0.012943	0.99782	0.99782
